# Supplementary material for: Tropical land use alters functional diversity of soil food webs and leads to monopolization of the detrital energy channel
Source: eLife. 2022 Mar 31;11:e75428. doi: 10.7554/eLife.75428 (PMC9033302; doi:10.7554/eLife.75428)
Supplement: Figure 1—source data 1. [file elife-75428-fig1-data1.xlsx]

## Sheet: CleanData
System	GroupCorrected	ID	Layer	Sum of Metabolism
F	Annelida	BF2	Soil	0.128
F	Annelida	BF3	Soil	2.121
F	Annelida	BF4	Litter	0.978
F	Annelida	HF1	Soil	9.109
F	Annelida	HF2	Soil	38.178
F	Annelida	HF3	Litter	6.254
F	Annelida	HF3	Soil	47.207
F	Annelida	HF4	Litter	0.202
F	Annelida	HF4	Soil	3.7
F	Araneae	BF1	Litter	5.529
F	Araneae	BF1	Soil	0.916
F	Araneae	BF2	Litter	1.641
F	Araneae	BF2	Soil	7.31
F	Araneae	BF3	Litter	4.675
F	Araneae	BF3	Soil	1.477
F	Araneae	BF4	Litter	3.024
F	Araneae	BF4	Soil	4.634
F	Araneae	HF1	Litter	16.297
F	Araneae	HF1	Soil	1.451
F	Araneae	HF2	Soil	1.95
F	Araneae	HF3	Litter	3.611
F	Araneae	HF3	Soil	4.66
F	Araneae	HF4	Litter	2.378
F	Araneae	HF4	Soil	4.429
F	Blattodea	BF1	Litter	0.265
F	Blattodea	BF1	Soil	11.822
F	Blattodea	BF3	Litter	24.866
F	Blattodea	BF3	Soil	0.562
F	Blattodea	BF4	Litter	10.654
F	Blattodea	HF4	Soil	0.25
F	Chilopoda	BF1	Litter	11.779
F	Chilopoda	BF1	Soil	0.194
F	Chilopoda	BF2	Litter	0.348
F	Chilopoda	BF2	Soil	6.133
F	Chilopoda	BF3	Litter	1.24
F	Chilopoda	BF3	Soil	9.555
F	Chilopoda	BF4	Litter	1.012
F	Chilopoda	BF4	Soil	4.159
F	Chilopoda	HF1	Litter	0.843
F	Chilopoda	HF1	Soil	9.117
F	Chilopoda	HF2	Litter	15.554
F	Chilopoda	HF3	Soil	1.064
F	Chilopoda	HF4	Soil	8.282
F	Coleoptera	BF1	Litter	10.476
F	Coleoptera	BF1	Soil	2.32
F	Coleoptera	BF2	Litter	14.611
F	Coleoptera	BF2	Soil	32.198
F	Coleoptera	BF3	Litter	8.135
F	Coleoptera	BF3	Soil	2.44
F	Coleoptera	BF4	Litter	6.175
F	Coleoptera	BF4	Soil	3.177
F	Coleoptera	HF1	Litter	6.539
F	Coleoptera	HF1	Soil	4.969
F	Coleoptera	HF2	Soil	6.734
F	Coleoptera	HF3	Litter	5.967
F	Coleoptera	HF3	Soil	9.228
F	Coleoptera	HF4	Litter	0.877
F	Coleoptera	HF4	Soil	5.085
F	Collembola	BF1	Litter	5.246
F	Collembola	BF1	Soil	2.281
F	Collembola	BF2	Litter	2.745
F	Collembola	BF2	Soil	1.232
F	Collembola	BF3	Litter	15.791
F	Collembola	BF3	Soil	0.87
F	Collembola	BF4	Litter	2.334
F	Collembola	BF4	Soil	7.923
F	Collembola	HF1	Litter	4.802
F	Collembola	HF1	Soil	1.729
F	Collembola	HF2	Litter	0.269
F	Collembola	HF2	Soil	2.222
F	Collembola	HF3	Litter	3.944
F	Collembola	HF3	Soil	2.808
F	Collembola	HF4	Litter	3.825
F	Collembola	HF4	Soil	3.268
F	Diplopoda	BF1	Litter	1.924
F	Diplopoda	BF1	Soil	1.493
F	Diplopoda	BF2	Litter	1.167
F	Diplopoda	BF2	Soil	2.377
F	Diplopoda	BF3	Litter	2.005
F	Diplopoda	BF3	Soil	1.333
F	Diplopoda	BF4	Litter	0.246
F	Diplopoda	HF1	Soil	0.144
F	Diplopoda	HF3	Litter	4.981
F	Diplopoda	HF3	Soil	2.088
F	Diplopoda	HF4	Litter	0.081
F	Diplopoda	HF4	Soil	0.12
F	Diplura	BF1	Litter	0.772
F	Diplura	BF1	Soil	1.373
F	Diplura	BF2	Litter	0.256
F	Diplura	BF2	Soil	3.476
F	Diplura	BF3	Litter	2.326
F	Diplura	BF3	Soil	4.582
F	Diplura	BF4	Soil	0.624
F	Diplura	HF1	Litter	0.151
F	Diplura	HF1	Soil	3.173
F	Diplura	HF2	Soil	1.617
F	Diplura	HF3	Soil	1.796
F	Diplura	HF4	Soil	6.348
F	Diptera	BF1	Litter	0.624
F	Diptera	BF1	Soil	0.155
F	Diptera	BF2	Litter	0.899
F	Diptera	BF2	Soil	0.82
F	Diptera	BF3	Litter	0.262
F	Diptera	BF3	Soil	0.109
F	Diptera	BF4	Litter	0.613
F	Diptera	BF4	Soil	0.478
F	Diptera	HF1	Litter	0.725
F	Diptera	HF1	Soil	0.156
F	Diptera	HF2	Litter	0.008
F	Diptera	HF2	Soil	0.024
F	Diptera	HF3	Litter	0.492
F	Diptera	HF4	Litter	0.513
F	Diptera	HF4	Soil	0.009
F	Formicidae	BF1	Litter	25.473
F	Formicidae	BF1	Soil	35.166
F	Formicidae	BF2	Litter	6.919
F	Formicidae	BF2	Soil	23.375
F	Formicidae	BF3	Litter	2.324
F	Formicidae	BF3	Soil	27.206
F	Formicidae	BF4	Litter	3.839
F	Formicidae	BF4	Soil	12.408
F	Formicidae	HF1	Litter	11.19
F	Formicidae	HF1	Soil	4.116
F	Formicidae	HF2	Soil	4.721
F	Formicidae	HF3	Litter	35.604
F	Formicidae	HF3	Soil	36.602
F	Formicidae	HF4	Litter	9.877
F	Formicidae	HF4	Soil	7.565
F	Harpacticoida	BF2	Litter	0.047
F	Harpacticoida	HF4	Litter	0.035
F	Hemiptera	BF1	Litter	0.77
F	Hemiptera	BF1	Soil	0.035
F	Hemiptera	BF2	Litter	0.655
F	Hemiptera	BF2	Soil	0.341
F	Hemiptera	BF3	Litter	0.853
F	Hemiptera	BF4	Litter	2.093
F	Hemiptera	BF4	Soil	0.262
F	Hemiptera	HF1	Litter	0.034
F	Hemiptera	HF1	Soil	0.481
F	Hemiptera	HF2	Soil	0.198
F	Hemiptera	HF3	Litter	0.593
F	Hemiptera	HF3	Soil	0.122
F	Hirudinea	BF2	Litter	2.442
F	Hymenoptera	BF1	Litter	0.03
F	Hymenoptera	BF2	Soil	0.023
F	Hymenoptera	BF3	Litter	0.072
F	Hymenoptera	BF3	Soil	0.01
F	Hymenoptera	BF4	Soil	0.011
F	Hymenoptera	HF4	Litter	0.011
F	Isopoda	BF1	Litter	1.065
F	Isopoda	BF2	Soil	3.081
F	Isopoda	BF3	Litter	3.704
F	Isopoda	BF3	Soil	0.191
F	Isopoda	BF4	Litter	0.312
F	Isopoda	BF4	Soil	0.192
F	Isopoda	HF1	Soil	1.006
F	Isopoda	HF2	Soil	0.154
F	Isopoda	HF3	Litter	0.216
F	Isoptera	BF2	Soil	1.958
F	Isoptera	BF3	Soil	9.375
F	Lepidoptera	BF1	Litter	1.272
F	Lepidoptera	BF2	Litter	0.574
F	Lepidoptera	BF3	Litter	0.021
F	Lepidoptera	BF4	Litter	0.423
F	Mesostigmata	BF1	Litter	1.11
F	Mesostigmata	BF1	Soil	0.109
F	Mesostigmata	BF2	Litter	0.737
F	Mesostigmata	BF2	Soil	0.354
F	Mesostigmata	BF3	Litter	1.91
F	Mesostigmata	BF3	Soil	0.519
F	Mesostigmata	BF4	Litter	3.287
F	Mesostigmata	BF4	Soil	1.475
F	Mesostigmata	HF1	Litter	0.988
F	Mesostigmata	HF1	Soil	0.246
F	Mesostigmata	HF2	Litter	0.061
F	Mesostigmata	HF2	Soil	0.054
F	Mesostigmata	HF3	Litter	1.178
F	Mesostigmata	HF3	Soil	0.038
F	Mesostigmata	HF4	Litter	0.766
F	Mesostigmata	HF4	Soil	0.056
F	Opiliones	BF3	Litter	0.375
F	Opiliones	BF3	Soil	0.449
F	Opiliones	BF4	Soil	0.8
F	Opiliones	HF4	Soil	0.417
F	Oribatida	BF1	Litter	1.383
F	Oribatida	BF1	Soil	0.065
F	Oribatida	BF2	Litter	1.683
F	Oribatida	BF2	Soil	0.521
F	Oribatida	BF3	Litter	2.165
F	Oribatida	BF3	Soil	0.148
F	Oribatida	BF4	Litter	2.828
F	Oribatida	BF4	Soil	0.753
F	Oribatida	HF1	Litter	1.867
F	Oribatida	HF1	Soil	0.418
F	Oribatida	HF2	Litter	0.228
F	Oribatida	HF2	Soil	0.09
F	Oribatida	HF3	Litter	1.047
F	Oribatida	HF3	Soil	0.045
F	Oribatida	HF4	Litter	1.085
F	Oribatida	HF4	Soil	0.147
F	Orthoptera	BF1	Litter	0.883
F	Orthoptera	BF4	Soil	1.317
F	Orthoptera	HF4	Litter	4.81
F	Pauropoda	BF1	Litter	0.364
F	Pauropoda	BF2	Litter	0.44
F	Pauropoda	BF2	Soil	0.557
F	Pauropoda	BF3	Litter	0.209
F	Pauropoda	HF1	Soil	0.026
F	Pauropoda	HF2	Soil	0.059
F	Pauropoda	HF3	Soil	0.101
F	Prostigmata	BF2	Litter	0.035
F	Prostigmata	BF3	Litter	0.067
F	Prostigmata	BF4	Litter	0.009
F	Prostigmata	HF1	Litter	0.002
F	Prostigmata	HF2	Soil	0.002
F	Prostigmata	HF4	Litter	0.003
F	Prostigmata	HF4	Soil	0.003
F	Protura	BF1	Litter	0.079
F	Protura	BF2	Soil	0.128
F	Protura	BF3	Litter	0.081
F	Protura	HF1	Soil	0.081
F	Protura	HF2	Soil	0.037
F	Protura	HF3	Soil	0.021
F	Protura	HF4	Soil	0.016
F	Pseudoscorpionida	BF1	Litter	4.044
F	Pseudoscorpionida	BF1	Soil	1.085
F	Pseudoscorpionida	BF2	Litter	1.645
F	Pseudoscorpionida	BF2	Soil	4.903
F	Pseudoscorpionida	BF3	Litter	9.365
F	Pseudoscorpionida	BF3	Soil	4.139
F	Pseudoscorpionida	BF4	Litter	3.223
F	Pseudoscorpionida	BF4	Soil	10.707
F	Pseudoscorpionida	HF1	Litter	3.077
F	Pseudoscorpionida	HF1	Soil	5.763
F	Pseudoscorpionida	HF3	Litter	1.627
F	Pseudoscorpionida	HF3	Soil	0.404
F	Pseudoscorpionida	HF4	Litter	3.051
F	Pseudoscorpionida	HF4	Soil	3.533
F	Psocoptera	BF1	Litter	0.119
F	Psocoptera	BF1	Soil	0.106
F	Psocoptera	BF2	Litter	0.11
F	Psocoptera	BF2	Soil	0.061
F	Psocoptera	BF4	Litter	1.732
F	Psocoptera	HF3	Litter	0.223
F	Psocoptera	HF4	Litter	0.288
F	Psocoptera	HF4	Soil	0.141
F	Schizomida	BF1	Soil	1.379
F	Schizomida	BF2	Litter	0.565
F	Schizomida	BF2	Soil	0.881
F	Schizomida	HF1	Soil	0.335
F	Schizomida	HF2	Soil	0.52
F	Schizomida	HF3	Litter	1.764
F	Schizomida	HF4	Soil	2.503
F	Symphyla	BF1	Litter	3.208
F	Symphyla	BF1	Soil	2.014
F	Symphyla	BF2	Litter	1.421
F	Symphyla	BF2	Soil	4.7
F	Symphyla	BF3	Litter	1.915
F	Symphyla	BF3	Soil	2.656
F	Symphyla	BF4	Litter	1.811
F	Symphyla	BF4	Soil	1.704
F	Symphyla	HF1	Litter	0.363
F	Symphyla	HF1	Soil	9.993
F	Symphyla	HF2	Soil	5.597
F	Symphyla	HF3	Litter	0.09
F	Symphyla	HF3	Soil	4.134
F	Symphyla	HF4	Litter	0.425
F	Symphyla	HF4	Soil	9.916
F	Thysanoptera	BF1	Litter	1.587
F	Thysanoptera	BF1	Soil	0.076
F	Thysanoptera	BF2	Litter	0.237
F	Thysanoptera	BF3	Litter	0.073
F	Thysanoptera	BF4	Soil	0.141
F	Thysanoptera	HF1	Litter	0.197
F	Thysanoptera	HF2	Litter	0.424
F	Thysanoptera	HF2	Soil	0.201
F	Thysanoptera	HF3	Litter	0.345
F	Thysanoptera	HF3	Soil	0.076
J	Annelida	BJ2	Litter	2.18
J	Annelida	BJ2	Soil	423.093
J	Annelida	BJ3	Soil	317.836
J	Annelida	BJ4	Litter	0.024
J	Annelida	BJ4	Soil	78.365
J	Annelida	BJ5	Soil	0.141
J	Annelida	HJ1	Soil	220.45
J	Annelida	HJ2	Litter	4.148
J	Annelida	HJ2	Soil	7.071
J	Annelida	HJ3	Soil	695.665
J	Annelida	HJ4	Soil	306.356
J	Araneae	BJ2	Soil	3.506
J	Araneae	BJ3	Litter	0.239
J	Araneae	BJ3	Soil	1.898
J	Araneae	BJ4	Litter	0.467
J	Araneae	BJ4	Soil	1.629
J	Araneae	BJ5	Soil	2.016
J	Araneae	HJ1	Soil	1.058
J	Araneae	HJ2	Litter	2.552
J	Araneae	HJ2	Soil	1.764
J	Araneae	HJ3	Litter	0.276
J	Araneae	HJ3	Soil	0.621
J	Araneae	HJ4	Litter	2.834
J	Araneae	HJ4	Soil	0.583
J	Blattodea	BJ2	Litter	19.864
J	Blattodea	BJ5	Litter	0.627
J	Blattodea	BJ5	Soil	0.604
J	Blattodea	HJ2	Litter	1.74
J	Blattodea	HJ2	Soil	6.052
J	Chilopoda	BJ2	Soil	2.343
J	Chilopoda	BJ3	Litter	0.377
J	Chilopoda	BJ3	Soil	1.621
J	Chilopoda	BJ4	Soil	1.306
J	Chilopoda	BJ5	Soil	0.613
J	Chilopoda	HJ1	Soil	5.68
J	Chilopoda	HJ2	Litter	3.403
J	Chilopoda	HJ2	Soil	6.178
J	Chilopoda	HJ3	Litter	0.288
J	Chilopoda	HJ3	Soil	5.916
J	Chilopoda	HJ4	Litter	0.961
J	Chilopoda	HJ4	Soil	0.822
J	Coleoptera	BJ2	Litter	10.96
J	Coleoptera	BJ2	Soil	4.441
J	Coleoptera	BJ3	Litter	3.804
J	Coleoptera	BJ3	Soil	6.5
J	Coleoptera	BJ4	Litter	7.015
J	Coleoptera	BJ4	Soil	13.056
J	Coleoptera	BJ5	Litter	3.426
J	Coleoptera	BJ5	Soil	5.49
J	Coleoptera	HJ1	Litter	1.839
J	Coleoptera	HJ1	Soil	2.922
J	Coleoptera	HJ2	Litter	5.875
J	Coleoptera	HJ2	Soil	3.049
J	Coleoptera	HJ3	Litter	0.018
J	Coleoptera	HJ3	Soil	2.241
J	Coleoptera	HJ4	Litter	5.801
J	Coleoptera	HJ4	Soil	2.116
J	Collembola	BJ2	Litter	2.716
J	Collembola	BJ2	Soil	1.199
J	Collembola	BJ3	Litter	2.563
J	Collembola	BJ3	Soil	1.557
J	Collembola	BJ4	Litter	3.939
J	Collembola	BJ4	Soil	1.076
J	Collembola	BJ5	Litter	0.501
J	Collembola	BJ5	Soil	1.864
J	Collembola	HJ1	Litter	2.641
J	Collembola	HJ1	Soil	1.837
J	Collembola	HJ2	Litter	4.553
J	Collembola	HJ2	Soil	1.177
J	Collembola	HJ3	Litter	0.922
J	Collembola	HJ3	Soil	0.644
J	Collembola	HJ4	Litter	0.66
J	Collembola	HJ4	Soil	1.585
J	Dermaptera	HJ1	Soil	2.839
J	Diplopoda	BJ2	Soil	1.787
J	Diplopoda	BJ3	Litter	0.232
J	Diplopoda	BJ3	Soil	2.249
J	Diplopoda	BJ4	Litter	0.305
J	Diplopoda	BJ4	Soil	0.541
J	Diplopoda	BJ5	Soil	0.09
J	Diplopoda	HJ1	Litter	2.283
J	Diplopoda	HJ1	Soil	5.158
J	Diplopoda	HJ2	Litter	0.496
J	Diplopoda	HJ2	Soil	1.392
J	Diplopoda	HJ3	Litter	0.374
J	Diplopoda	HJ3	Soil	2.437
J	Diplopoda	HJ4	Litter	0.043
J	Diplopoda	HJ4	Soil	2.468
J	Diplura	BJ2	Soil	3.784
J	Diplura	BJ3	Soil	4.47
J	Diplura	BJ4	Soil	6.107
J	Diplura	BJ5	Litter	0.095
J	Diplura	BJ5	Soil	4.178
J	Diplura	HJ1	Soil	8.16
J	Diplura	HJ2	Litter	0.289
J	Diplura	HJ2	Soil	0.831
J	Diplura	HJ3	Soil	2.411
J	Diplura	HJ4	Soil	1.946
J	Diptera	BJ2	Litter	0.516
J	Diptera	BJ2	Soil	0.121
J	Diptera	BJ3	Litter	0.349
J	Diptera	BJ3	Soil	0.038
J	Diptera	BJ4	Litter	0.693
J	Diptera	BJ4	Soil	0.341
J	Diptera	BJ5	Litter	0.093
J	Diptera	HJ1	Litter	0.215
J	Diptera	HJ1	Soil	13.164
J	Diptera	HJ2	Litter	0.914
J	Diptera	HJ2	Soil	0.547
J	Diptera	HJ3	Litter	0.456
J	Diptera	HJ3	Soil	0.094
J	Diptera	HJ4	Litter	1.263
J	Diptera	HJ4	Soil	1.319
J	Formicidae	BJ2	Litter	1.828
J	Formicidae	BJ2	Soil	1.641
J	Formicidae	BJ3	Litter	0.175
J	Formicidae	BJ3	Soil	7.124
J	Formicidae	BJ4	Litter	0.536
J	Formicidae	BJ4	Soil	7.608
J	Formicidae	BJ5	Litter	0.835
J	Formicidae	BJ5	Soil	0.636
J	Formicidae	HJ1	Soil	4.86
J	Formicidae	HJ2	Litter	14.822
J	Formicidae	HJ2	Soil	2.431
J	Formicidae	HJ3	Litter	2.678
J	Formicidae	HJ3	Soil	4.393
J	Formicidae	HJ4	Litter	0.226
J	Formicidae	HJ4	Soil	2.423
J	Harpacticoida	HJ2	Litter	0.078
J	Harpacticoida	HJ2	Soil	0.024
J	Harpacticoida	HJ4	Litter	0.065
J	Hemiptera	BJ2	Litter	0.159
J	Hemiptera	BJ2	Soil	0.52
J	Hemiptera	BJ3	Soil	0.671
J	Hemiptera	BJ5	Soil	0.458
J	Hemiptera	HJ1	Litter	4.795
J	Hemiptera	HJ1	Soil	0.302
J	Hemiptera	HJ2	Litter	0.156
J	Hemiptera	HJ2	Soil	0.138
J	Hemiptera	HJ3	Litter	0.092
J	Hemiptera	HJ3	Soil	0.038
J	Hymenoptera	BJ3	Litter	0.026
J	Hymenoptera	BJ5	Litter	0.02
J	Isopoda	BJ2	Soil	0.968
J	Isopoda	BJ3	Litter	0.497
J	Isopoda	BJ3	Soil	0.967
J	Isopoda	BJ4	Soil	1.43
J	Isopoda	BJ5	Soil	0.439
J	Isopoda	HJ1	Litter	0.237
J	Isopoda	HJ1	Soil	1.407
J	Isopoda	HJ2	Soil	0.502
J	Isoptera	BJ5	Litter	8.276
J	Isoptera	BJ5	Soil	3.057
J	Isoptera	HJ2	Soil	0.768
J	Isoptera	HJ4	Soil	1.341
J	Lepidoptera	BJ2	Soil	0.099
J	Lepidoptera	BJ3	Litter	0.216
J	Lepidoptera	HJ1	Litter	0.365
J	Lepidoptera	HJ2	Litter	0.071
J	Mesostigmata	BJ2	Litter	0.453
J	Mesostigmata	BJ2	Soil	0.144
J	Mesostigmata	BJ3	Litter	0.43
J	Mesostigmata	BJ3	Soil	0.109
J	Mesostigmata	BJ4	Litter	0.45
J	Mesostigmata	BJ4	Soil	0.127
J	Mesostigmata	BJ5	Litter	0.093
J	Mesostigmata	BJ5	Soil	0.069
J	Mesostigmata	HJ1	Litter	0.09
J	Mesostigmata	HJ1	Soil	0.104
J	Mesostigmata	HJ2	Litter	0.291
J	Mesostigmata	HJ2	Soil	0.023
J	Mesostigmata	HJ3	Litter	0.031
J	Mesostigmata	HJ3	Soil	0.04
J	Mesostigmata	HJ4	Litter	0.468
J	Mesostigmata	HJ4	Soil	0.14
J	Opiliones	BJ2	Litter	0.64
J	Opiliones	HJ2	Litter	1.465
J	Oribatida	BJ2	Litter	1.008
J	Oribatida	BJ2	Soil	0.113
J	Oribatida	BJ3	Litter	1.218
J	Oribatida	BJ3	Soil	0.139
J	Oribatida	BJ4	Litter	0.825
J	Oribatida	BJ4	Soil	0.401
J	Oribatida	BJ5	Litter	0.996
J	Oribatida	BJ5	Soil	0.185
J	Oribatida	HJ1	Litter	1.175
J	Oribatida	HJ1	Soil	0.415
J	Oribatida	HJ2	Litter	0.365
J	Oribatida	HJ2	Soil	0.114
J	Oribatida	HJ3	Litter	0.603
J	Oribatida	HJ3	Soil	0.223
J	Oribatida	HJ4	Litter	0.967
J	Oribatida	HJ4	Soil	0.274
J	Orthoptera	BJ2	Soil	0.439
J	Orthoptera	BJ3	Soil	0.798
J	Pauropoda	BJ2	Litter	0.036
J	Pauropoda	BJ2	Soil	0.03
J	Pauropoda	BJ3	Soil	0.146
J	Pauropoda	BJ5	Soil	0.021
J	Pauropoda	HJ1	Litter	0.219
J	Pauropoda	HJ1	Soil	0.316
J	Pauropoda	HJ2	Litter	0.183
J	Pauropoda	HJ3	Litter	0.023
J	Pauropoda	HJ4	Soil	0.078
J	Prostigmata	BJ4	Litter	0.01
J	Protura	BJ2	Soil	0.017
J	Protura	BJ3	Soil	0.126
J	Protura	BJ4	Litter	0.062
J	Protura	BJ5	Soil	0.084
J	Protura	HJ1	Soil	0.022
J	Protura	HJ4	Soil	0.018
J	Pseudoscorpionida	BJ2	Soil	3.418
J	Pseudoscorpionida	BJ3	Litter	0.343
J	Pseudoscorpionida	BJ3	Soil	4.107
J	Pseudoscorpionida	BJ4	Litter	0.837
J	Pseudoscorpionida	BJ4	Soil	4.139
J	Pseudoscorpionida	BJ5	Soil	3.446
J	Pseudoscorpionida	HJ1	Soil	1.389
J	Pseudoscorpionida	HJ2	Litter	1.189
J	Pseudoscorpionida	HJ2	Soil	2.63
J	Pseudoscorpionida	HJ3	Soil	0.162
J	Pseudoscorpionida	HJ4	Soil	1.047
J	Psocoptera	BJ3	Litter	0.639
J	Psocoptera	BJ4	Soil	0.049
J	Psocoptera	BJ5	Litter	0.024
J	Psocoptera	HJ1	Litter	2.012
J	Psocoptera	HJ2	Litter	0.391
J	Psocoptera	HJ2	Soil	0.07
J	Psocoptera	HJ3	Litter	0.666
J	Psocoptera	HJ4	Litter	1.152
J	Schizomida	BJ2	Soil	0.238
J	Schizomida	BJ3	Soil	0.501
J	Schizomida	HJ1	Soil	0.193
J	Symphyla	BJ2	Litter	0.141
J	Symphyla	BJ2	Soil	4.51
J	Symphyla	BJ3	Litter	1.362
J	Symphyla	BJ3	Soil	8.259
J	Symphyla	BJ4	Litter	0.657
J	Symphyla	BJ4	Soil	1.517
J	Symphyla	BJ5	Litter	0.305
J	Symphyla	BJ5	Soil	2.505
J	Symphyla	HJ1	Soil	0.784
J	Symphyla	HJ2	Litter	1.977
J	Symphyla	HJ2	Soil	1.227
J	Symphyla	HJ3	Litter	0.068
J	Symphyla	HJ3	Soil	0.272
J	Symphyla	HJ4	Litter	0.036
J	Symphyla	HJ4	Soil	0.367
J	Thysanoptera	BJ2	Litter	0.694
J	Thysanoptera	BJ2	Soil	0.587
J	Thysanoptera	BJ3	Litter	0.596
J	Thysanoptera	BJ3	Soil	0.121
J	Thysanoptera	BJ4	Litter	0.404
J	Thysanoptera	BJ4	Soil	0.203
J	Thysanoptera	BJ5	Litter	0.213
J	Thysanoptera	HJ1	Litter	0.406
J	Thysanoptera	HJ2	Litter	0.221
J	Thysanoptera	HJ3	Litter	0.264
J	Thysanoptera	HJ3	Soil	0.083
J	Thysanoptera	HJ4	Litter	0.31
O	Annelida	BO2	Soil	206.905
O	Annelida	BO3	Litter	8.941
O	Annelida	BO3	Soil	171.72
O	Annelida	BO4	Soil	75.98
O	Annelida	BO5	Soil	157.77
O	Annelida	HO1	Litter	36.968
O	Annelida	HO1	Soil	108.716
O	Annelida	HO2	Litter	0.102
O	Annelida	HO2	Soil	11.576
O	Annelida	HO3	Litter	0.048
O	Annelida	HO3	Soil	250.153
O	Annelida	HO4	Soil	287.367
O	Araneae	BO2	Soil	0.161
O	Araneae	BO3	Litter	1.894
O	Araneae	BO4	Litter	0.102
O	Araneae	BO4	Soil	0.487
O	Araneae	BO5	Litter	0.128
O	Araneae	BO5	Soil	1.391
O	Araneae	HO1	Soil	0.294
O	Araneae	HO3	Litter	0.376
O	Araneae	HO4	Soil	0.031
O	Blattodea	BO3	Litter	0.559
O	Chilopoda	BO2	Soil	2.372
O	Chilopoda	BO3	Litter	1.424
O	Chilopoda	BO3	Soil	3.626
O	Chilopoda	BO4	Soil	1.688
O	Chilopoda	BO5	Soil	4.421
O	Chilopoda	HO1	Soil	2.254
O	Chilopoda	HO2	Soil	2.14
O	Chilopoda	HO3	Litter	0.775
O	Chilopoda	HO3	Soil	3.687
O	Chilopoda	HO4	Litter	2.151
O	Chilopoda	HO4	Soil	1.176
O	Coleoptera	BO2	Litter	0.115
O	Coleoptera	BO2	Soil	3.781
O	Coleoptera	BO3	Litter	0.836
O	Coleoptera	BO3	Soil	2.526
O	Coleoptera	BO4	Litter	0.536
O	Coleoptera	BO4	Soil	2.344
O	Coleoptera	BO5	Litter	0.17
O	Coleoptera	BO5	Soil	0.548
O	Coleoptera	HO1	Litter	0.102
O	Coleoptera	HO1	Soil	3.672
O	Coleoptera	HO2	Litter	0.156
O	Coleoptera	HO2	Soil	1.063
O	Coleoptera	HO3	Soil	0.657
O	Coleoptera	HO4	Soil	1.902
O	Collembola	BO2	Litter	0.365
O	Collembola	BO2	Soil	6.498
O	Collembola	BO3	Litter	4.147
O	Collembola	BO3	Soil	6.365
O	Collembola	BO4	Litter	0.9
O	Collembola	BO4	Soil	3.778
O	Collembola	BO5	Litter	1.205
O	Collembola	BO5	Soil	10.426
O	Collembola	HO1	Litter	1.33
O	Collembola	HO1	Soil	7.366
O	Collembola	HO2	Litter	0.363
O	Collembola	HO2	Soil	4.635
O	Collembola	HO3	Litter	0.308
O	Collembola	HO3	Soil	0.749
O	Collembola	HO4	Litter	0.442
O	Collembola	HO4	Soil	1.554
O	Dermaptera	HO1	Soil	1.83
O	Diplopoda	BO2	Soil	0.503
O	Diplopoda	BO3	Litter	0.543
O	Diplopoda	BO3	Soil	1.009
O	Diplopoda	BO4	Soil	0.159
O	Diplopoda	BO5	Litter	0.211
O	Diplopoda	BO5	Soil	2.547
O	Diplopoda	HO2	Soil	0.54
O	Diplopoda	HO3	Litter	0.964
O	Diplopoda	HO3	Soil	0.248
O	Diplopoda	HO4	Soil	0.128
O	Diplura	BO2	Soil	1.308
O	Diplura	BO5	Litter	0.182
O	Diplura	BO5	Soil	3.786
O	Diplura	HO1	Soil	0.776
O	Diplura	HO2	Soil	0.421
O	Diptera	BO2	Litter	0.161
O	Diptera	BO2	Soil	0.163
O	Diptera	BO3	Litter	0.232
O	Diptera	BO4	Litter	0.092
O	Diptera	BO4	Soil	0.29
O	Diptera	BO5	Litter	0.376
O	Diptera	BO5	Soil	0.724
O	Diptera	HO1	Litter	0.102
O	Diptera	HO1	Soil	0.59
O	Diptera	HO2	Litter	0.07
O	Diptera	HO2	Soil	0.391
O	Diptera	HO3	Litter	0.418
O	Diptera	HO3	Soil	0.492
O	Diptera	HO4	Litter	0.898
O	Diptera	HO4	Soil	1.061
O	Formicidae	BO2	Soil	1.483
O	Formicidae	BO3	Litter	0.335
O	Formicidae	BO3	Soil	30.183
O	Formicidae	BO4	Litter	0.153
O	Formicidae	BO4	Soil	0.257
O	Formicidae	BO5	Litter	0.404
O	Formicidae	BO5	Soil	4.504
O	Formicidae	HO1	Litter	1.847
O	Formicidae	HO1	Soil	2.835
O	Formicidae	HO2	Soil	0.68
O	Formicidae	HO3	Litter	0.973
O	Formicidae	HO3	Soil	0.106
O	Formicidae	HO4	Litter	0.847
O	Formicidae	HO4	Soil	2.436
O	Hemiptera	BO2	Litter	0.642
O	Hemiptera	BO2	Soil	7.639
O	Hemiptera	BO3	Litter	0.42
O	Hemiptera	BO3	Soil	0.041
O	Hemiptera	BO4	Soil	0.771
O	Hemiptera	BO5	Litter	0.157
O	Hemiptera	BO5	Soil	0.199
O	Hemiptera	HO1	Litter	1.075
O	Hemiptera	HO1	Soil	0.171
O	Hemiptera	HO2	Soil	0.125
O	Hemiptera	HO3	Litter	0.1
O	Hemiptera	HO3	Soil	0.499
O	Hemiptera	HO4	Litter	0.21
O	Hemiptera	HO4	Soil	0.113
O	Hymenoptera	BO2	Soil	0.058
O	Hymenoptera	BO3	Litter	0.089
O	Hymenoptera	BO4	Soil	0.06
O	Hymenoptera	BO5	Litter	0.041
O	Hymenoptera	HO2	Litter	0.012
O	Isopoda	BO2	Litter	0.215
O	Isopoda	BO2	Soil	0.367
O	Isopoda	BO3	Litter	0.535
O	Isopoda	BO5	Soil	0.491
O	Isopoda	HO1	Soil	0.302
O	Isopoda	HO2	Soil	0.996
O	Isopoda	HO4	Soil	0.422
O	Isoptera	BO3	Soil	32.105
O	Isoptera	HO3	Soil	0.325
O	Lepidoptera	BO2	Soil	0.037
O	Lepidoptera	BO3	Litter	0.076
O	Lepidoptera	BO4	Soil	0.409
O	Lepidoptera	HO2	Soil	0.043
O	Mesostigmata	BO2	Litter	0.012
O	Mesostigmata	BO2	Soil	0.547
O	Mesostigmata	BO3	Litter	0.388
O	Mesostigmata	BO3	Soil	0.007
O	Mesostigmata	BO4	Litter	0.068
O	Mesostigmata	BO4	Soil	0.021
O	Mesostigmata	BO5	Litter	0.254
O	Mesostigmata	BO5	Soil	2.009
O	Mesostigmata	HO1	Litter	0.048
O	Mesostigmata	HO1	Soil	0.124
O	Mesostigmata	HO2	Litter	0.051
O	Mesostigmata	HO2	Soil	0.005
O	Mesostigmata	HO3	Litter	0.083
O	Mesostigmata	HO3	Soil	0.028
O	Mesostigmata	HO4	Litter	0.026
O	Mesostigmata	HO4	Soil	0.146
O	Oribatida	BO2	Litter	0.03
O	Oribatida	BO2	Soil	0.296
O	Oribatida	BO3	Litter	1.265
O	Oribatida	BO3	Soil	0.28
O	Oribatida	BO4	Litter	0.17
O	Oribatida	BO4	Soil	0.131
O	Oribatida	BO5	Litter	0.829
O	Oribatida	BO5	Soil	2.365
O	Oribatida	HO1	Litter	0.142
O	Oribatida	HO1	Soil	0.504
O	Oribatida	HO2	Litter	0.041
O	Oribatida	HO2	Soil	0.069
O	Oribatida	HO3	Litter	0.384
O	Oribatida	HO3	Soil	0.373
O	Oribatida	HO4	Litter	0.155
O	Oribatida	HO4	Soil	0.663
O	Orthoptera	BO4	Litter	0.791
O	Pauropoda	BO2	Litter	0.079
O	Pauropoda	BO2	Soil	0.689
O	Pauropoda	BO3	Soil	0.029
O	Pauropoda	BO4	Soil	0.018
O	Pauropoda	HO1	Soil	0.302
O	Pauropoda	HO2	Soil	0.325
O	Protura	BO2	Soil	0.093
O	Protura	BO4	Soil	0.025
O	Protura	BO5	Litter	0.019
O	Pseudoscorpionida	BO3	Litter	0.324
O	Pseudoscorpionida	BO3	Soil	1.232
O	Pseudoscorpionida	BO5	Soil	0.757
O	Pseudoscorpionida	HO1	Litter	0.742
O	Pseudoscorpionida	HO2	Soil	0.173
O	Pseudoscorpionida	HO4	Soil	0.308
O	Psocoptera	BO4	Litter	0.127
O	Psocoptera	BO4	Soil	0.183
O	Psocoptera	BO5	Litter	0.092
O	Psocoptera	HO2	Litter	0.628
O	Symphyla	BO2	Soil	1.314
O	Symphyla	BO3	Litter	0.303
O	Symphyla	BO3	Soil	4.318
O	Symphyla	BO5	Litter	0.072
O	Symphyla	BO5	Soil	3.084
O	Symphyla	HO1	Litter	0.462
O	Symphyla	HO1	Soil	2.519
O	Symphyla	HO2	Soil	1.267
O	Symphyla	HO3	Litter	0.994
O	Symphyla	HO3	Soil	0.886
O	Symphyla	HO4	Litter	0.282
O	Symphyla	HO4	Soil	0.495
O	Thysanoptera	BO2	Soil	0.054
O	Thysanoptera	BO3	Litter	0.088
O	Thysanoptera	BO4	Litter	0.101
O	Thysanoptera	BO5	Litter	0.077
O	Thysanoptera	HO1	Litter	0.249
O	Thysanoptera	HO1	Soil	0.036
O	Thysanoptera	HO2	Litter	0.13
O	Thysanoptera	HO2	Soil	0.027
O	Thysanoptera	HO3	Litter	0.125
O	Thysanoptera	HO3	Soil	0.033
O	Thysanoptera	HO4	Litter	0.006
O	Thysanoptera	HO4	Soil	0.141
R	Annelida	BR1	Litter	0.158
R	Annelida	BR3	Soil	168.83
R	Annelida	BR4	Soil	168.373
R	Annelida	HR1	Litter	4.419
R	Annelida	HR1	Soil	253.251
R	Annelida	HR2	Litter	0.418
R	Annelida	HR2	Soil	77.844
R	Annelida	HR3	Litter	1.941
R	Annelida	HR3	Soil	267.356
R	Annelida	HR4	Litter	64.03
R	Annelida	HR4	Soil	159.714
R	Araneae	BR1	Litter	0.637
R	Araneae	BR1	Soil	1.822
R	Araneae	BR2	Litter	0.461
R	Araneae	BR2	Soil	0.241
R	Araneae	BR3	Litter	3.565
R	Araneae	BR3	Soil	0.408
R	Araneae	BR4	Litter	1.172
R	Araneae	BR4	Soil	1.743
R	Araneae	HR1	Soil	1.457
R	Araneae	HR2	Litter	2.189
R	Araneae	HR2	Soil	4.442
R	Araneae	HR3	Litter	8.364
R	Araneae	HR3	Soil	1.263
R	Araneae	HR4	Litter	0.157
R	Araneae	HR4	Soil	1.04
R	Blattodea	BR1	Soil	0.302
R	Blattodea	HR3	Soil	0.505
R	Chilopoda	BR1	Litter	0.821
R	Chilopoda	BR1	Soil	2.198
R	Chilopoda	BR3	Soil	5.042
R	Chilopoda	BR4	Soil	0.758
R	Chilopoda	HR1	Litter	0.928
R	Chilopoda	HR1	Soil	2.239
R	Chilopoda	HR2	Soil	3.828
R	Chilopoda	HR3	Litter	0.858
R	Chilopoda	HR3	Soil	2.583
R	Chilopoda	HR4	Litter	0.331
R	Chilopoda	HR4	Soil	2.094
R	Coleoptera	BR1	Litter	1.895
R	Coleoptera	BR1	Soil	5.427
R	Coleoptera	BR2	Litter	1.072
R	Coleoptera	BR2	Soil	9.255
R	Coleoptera	BR3	Soil	0.665
R	Coleoptera	BR4	Litter	0.328
R	Coleoptera	BR4	Soil	3.575
R	Coleoptera	HR1	Litter	1.062
R	Coleoptera	HR1	Soil	4.793
R	Coleoptera	HR2	Litter	1.992
R	Coleoptera	HR2	Soil	6.704
R	Coleoptera	HR3	Litter	0.445
R	Coleoptera	HR3	Soil	6.237
R	Coleoptera	HR4	Litter	0.052
R	Coleoptera	HR4	Soil	9.081
R	Collembola	BR1	Litter	1.048
R	Collembola	BR1	Soil	1.885
R	Collembola	BR2	Litter	0.089
R	Collembola	BR2	Soil	0.476
R	Collembola	BR3	Litter	1.141
R	Collembola	BR3	Soil	1.332
R	Collembola	BR4	Litter	1.126
R	Collembola	BR4	Soil	0.372
R	Collembola	HR1	Litter	1.31
R	Collembola	HR1	Soil	1.838
R	Collembola	HR2	Litter	1.076
R	Collembola	HR2	Soil	1.393
R	Collembola	HR3	Litter	1.124
R	Collembola	HR3	Soil	2.582
R	Collembola	HR4	Litter	0.48
R	Collembola	HR4	Soil	1.327
R	Dermaptera	HR2	Litter	0.605
R	Dermaptera	HR3	Soil	1.026
R	Diplopoda	BR1	Litter	0.231
R	Diplopoda	BR1	Soil	1.344
R	Diplopoda	BR2	Soil	0.13
R	Diplopoda	BR3	Litter	0.224
R	Diplopoda	BR3	Soil	0.265
R	Diplopoda	BR4	Litter	0.167
R	Diplopoda	BR4	Soil	0.265
R	Diplopoda	HR1	Litter	0.782
R	Diplopoda	HR1	Soil	0.591
R	Diplopoda	HR2	Soil	0.958
R	Diplopoda	HR3	Soil	1.569
R	Diplopoda	HR4	Soil	0.455
R	Diplura	BR1	Soil	1.806
R	Diplura	BR2	Litter	0.068
R	Diplura	BR2	Soil	1.606
R	Diplura	BR3	Soil	1.537
R	Diplura	BR4	Soil	1.692
R	Diplura	HR2	Litter	0.255
R	Diplura	HR2	Soil	12.914
R	Diplura	HR3	Soil	0.284
R	Diplura	HR4	Soil	0.183
R	Diptera	BR1	Litter	0.595
R	Diptera	BR1	Soil	0.554
R	Diptera	BR2	Litter	0.118
R	Diptera	BR2	Soil	0.253
R	Diptera	BR3	Litter	0.39
R	Diptera	BR3	Soil	0.353
R	Diptera	BR4	Litter	0.108
R	Diptera	BR4	Soil	0.218
R	Diptera	HR1	Litter	0.413
R	Diptera	HR1	Soil	0.52
R	Diptera	HR2	Litter	0.158
R	Diptera	HR3	Litter	0.769
R	Diptera	HR3	Soil	0.176
R	Formicidae	BR1	Litter	0.048
R	Formicidae	BR1	Soil	1.985
R	Formicidae	BR2	Litter	0.11
R	Formicidae	BR2	Soil	2
R	Formicidae	BR3	Soil	0.059
R	Formicidae	BR4	Litter	0.834
R	Formicidae	BR4	Soil	1.153
R	Formicidae	HR1	Litter	0.923
R	Formicidae	HR1	Soil	4.644
R	Formicidae	HR2	Litter	33.005
R	Formicidae	HR2	Soil	3.408
R	Formicidae	HR3	Litter	3.351
R	Formicidae	HR3	Soil	6.112
R	Formicidae	HR4	Litter	3.281
R	Formicidae	HR4	Soil	0.791
R	Hemiptera	BR1	Litter	0.275
R	Hemiptera	BR1	Soil	0.019
R	Hemiptera	BR2	Litter	0.089
R	Hemiptera	BR4	Soil	0.088
R	Hemiptera	HR1	Litter	1.537
R	Hemiptera	HR2	Litter	0.007
R	Hemiptera	HR3	Litter	1.522
R	Hemiptera	HR4	Litter	0.019
R	Hirudinea	BR4	Soil	2.687
R	Hirudinea	HR1	Soil	28.248
R	Hirudinea	HR2	Soil	0.257
R	Hymenoptera	BR2	Soil	0.045
R	Hymenoptera	BR3	Litter	0.016
R	Hymenoptera	HR1	Soil	0.155
R	Isopoda	BR1	Soil	1.054
R	Isopoda	BR3	Soil	0.176
R	Isopoda	HR2	Soil	1.712
R	Isoptera	BR1	Litter	0.318
R	Lepidoptera	BR1	Litter	2.628
R	Lepidoptera	BR2	Litter	0.308
R	Lepidoptera	BR3	Litter	0.033
R	Lepidoptera	BR4	Litter	0.14
R	Lepidoptera	HR1	Litter	0.073
R	Lepidoptera	HR3	Litter	0.253
R	Lepidoptera	HR4	Litter	0.598
R	Mesostigmata	BR1	Litter	0.443
R	Mesostigmata	BR1	Soil	0.206
R	Mesostigmata	BR2	Litter	0.085
R	Mesostigmata	BR2	Soil	0.161
R	Mesostigmata	BR3	Litter	0.159
R	Mesostigmata	BR3	Soil	0.148
R	Mesostigmata	BR4	Litter	0.105
R	Mesostigmata	BR4	Soil	0.073
R	Mesostigmata	HR1	Litter	0.642
R	Mesostigmata	HR1	Soil	0.043
R	Mesostigmata	HR2	Litter	0.253
R	Mesostigmata	HR2	Soil	0.377
R	Mesostigmata	HR3	Litter	0.148
R	Mesostigmata	HR3	Soil	0.071
R	Mesostigmata	HR4	Litter	0.109
R	Mesostigmata	HR4	Soil	0.029
R	Opiliones	HR2	Litter	0.172
R	Opiliones	HR2	Soil	0.625
R	Oribatida	BR1	Litter	1.451
R	Oribatida	BR1	Soil	3.48
R	Oribatida	BR2	Litter	0.159
R	Oribatida	BR2	Soil	0.507
R	Oribatida	BR3	Litter	0.108
R	Oribatida	BR3	Soil	0.055
R	Oribatida	BR4	Litter	0.776
R	Oribatida	BR4	Soil	0.087
R	Oribatida	HR1	Litter	0.655
R	Oribatida	HR1	Soil	0.159
R	Oribatida	HR2	Litter	0.571
R	Oribatida	HR2	Soil	0.532
R	Oribatida	HR3	Litter	0.295
R	Oribatida	HR3	Soil	0.159
R	Oribatida	HR4	Litter	0.241
R	Oribatida	HR4	Soil	0.026
R	Orthoptera	BR4	Litter	0.734
R	Orthoptera	HR2	Litter	0.303
R	Pauropoda	BR3	Soil	0.022
R	Pauropoda	BR4	Soil	0.321
R	Pauropoda	HR1	Litter	0.05
R	Pauropoda	HR2	Litter	0.027
R	Pauropoda	HR2	Soil	0.045
R	Pauropoda	HR3	Soil	0.225
R	Pauropoda	HR4	Soil	0.068
R	Prostigmata	HR2	Soil	0.047
R	Protura	BR2	Soil	0.01
R	Protura	BR3	Litter	0.012
R	Protura	BR4	Soil	0.073
R	Protura	HR2	Litter	0.039
R	Protura	HR4	Soil	0.027
R	Pseudoscorpionida	BR1	Soil	0.658
R	Pseudoscorpionida	BR3	Soil	0.904
R	Pseudoscorpionida	BR4	Soil	0.061
R	Pseudoscorpionida	HR1	Soil	0.135
R	Pseudoscorpionida	HR2	Soil	1.474
R	Psocoptera	BR1	Litter	0.61
R	Psocoptera	BR1	Soil	0.048
R	Psocoptera	BR2	Litter	0.267
R	Psocoptera	BR3	Litter	0.734
R	Psocoptera	BR3	Soil	0.038
R	Psocoptera	BR4	Litter	2.23
R	Psocoptera	HR1	Litter	0.049
R	Psocoptera	HR2	Litter	0.031
R	Psocoptera	HR2	Soil	0.194
R	Psocoptera	HR3	Litter	3.897
R	Psocoptera	HR3	Soil	0.085
R	Psocoptera	HR4	Litter	0.619
R	Schizomida	BR1	Litter	0.216
R	Schizomida	BR1	Soil	0.456
R	Schizomida	BR3	Soil	0.214
R	Schizomida	BR4	Soil	0.342
R	Schizomida	HR1	Litter	0.903
R	Schizomida	HR2	Soil	0.403
R	Schizomida	HR3	Soil	0.297
R	Symphyla	BR1	Litter	0.403
R	Symphyla	BR1	Soil	6.412
R	Symphyla	BR2	Soil	0.75
R	Symphyla	BR3	Litter	0.374
R	Symphyla	BR3	Soil	2.799
R	Symphyla	BR4	Soil	2.055
R	Symphyla	HR1	Litter	0.495
R	Symphyla	HR1	Soil	2.802
R	Symphyla	HR2	Litter	0.321
R	Symphyla	HR2	Soil	4.132
R	Symphyla	HR3	Litter	0.205
R	Symphyla	HR3	Soil	4.931
R	Symphyla	HR4	Litter	0.336
R	Symphyla	HR4	Soil	3.626
R	Thysanoptera	BR1	Litter	0.49
R	Thysanoptera	BR2	Litter	1.731
R	Thysanoptera	BR2	Soil	0.038
R	Thysanoptera	BR3	Litter	0.331
R	Thysanoptera	BR4	Litter	0.105
R	Thysanoptera	HR1	Litter	0.267
R	Thysanoptera	HR2	Soil	0.185
R	Thysanoptera	HR3	Litter	1.577
R	Thysanoptera	HR4	Litter	0.147
