# Supplementary material for: Tropical land use alters functional diversity of soil food webs and leads to monopolization of the detrital energy channel
Source: eLife. 2022 Mar 31;11:e75428. doi: 10.7554/eLife.75428 (PMC9033302; doi:10.7554/eLife.75428)
Supplement: Figure 1—source data 2. [file elife-75428-fig1-data2.xlsx]

## Sheet: Sheet1
GroupCorrected	ID	Layer	d13Clitter	d15Nlitter	D13C	percentC	D15N	percentN	d13C	d15N
Annelida	HF2	Litter	-31.5546	-0.660909	-26.0136	35.3695	2.89435	8.91467	5.54091	3.55526
Annelida	BO5	Litter	-30.6942	0.177591	-26.9172	35.2219	2.93871	6.65448	3.77701	2.76111
Annelida	HR1	Soil	-29.2332	0.621091	-23.5072	33.3918	3.86775	11.8639	5.72594	3.24666
Annelida	HF2	Soil	-31.5546	-0.660909	-25.1788	44.4597	4.12167	11.5407	6.37578	4.78258
Annelida	HF1	Litter	-30.7821	0.202091	-26.3163	34.5394	4.29875	9.51407	4.46586	4.09666
Annelida	HO4	Litter | Soil	-29.8435	0.147091	-25.6333	45.5778	4.32991	10.7812	4.21018	4.18282
Annelida	HJ2	Soil	-30.9372	1.15409	-25.9363	39.4222	4.35675	9.15718	5.00096	3.20266
Annelida	BJ4	Litter | Soil	-30.343	-1.50791	-25.4578	11.946	4.49067	3.6035	4.88524	5.99858
Annelida	BO3	Litter	-28.4809	0.876091	-25.1158	46.5819	4.68667	13.4916	3.36511	3.81058
Annelida	HO4	Litter | Soil	-29.8435	0.147091	-24.8842	12.9116	4.73048	3.26615	4.9593	4.58339
Annelida	BJ2	Litter | Soil	-29.6834	-3.09891	-25.5903	47.0598	4.79075	14.4504	4.09312	7.88966
Annelida	BO5	Litter | Soil	-30.912	0.952091	-24.9513	38.342	5.03075	13.5437	5.96078	4.07866
Annelida	HJ2	Litter	-30.9372	1.15409	-26.3446	37.5693	5.04435	9.19034	4.59256	3.89026
Annelida	HF1	Soil	-30.7821	0.202091	-26.1198	30.7542	5.04467	7.66657	4.66233	4.84258
Annelida	BO2	Litter | Soil	-30.1688	-0.0129091	-25.1322	41.5946	5.19575	14.1644	5.03654	5.20866
Annelida	BF2	Litter | Soil	-32.2495	-0.670909	-25.3094	35.2657	5.24467	7.8615	6.94003	5.91558
Annelida	HR2	Litter	-29.6179	-1.35591	-25.6418	25.8209	5.29867	6.86964	3.97613	6.65458
Annelida	HJ1	Litter | Soil	-30.3027	0.428091	-24.5033	39.3024	5.41575	13.0114	5.79948	4.98766
Annelida	BO3	Soil	-28.4809	0.876091	-25.7112	43.2375	5.42475	14.06	2.76964	4.54866
Annelida	HO3	Litter | Soil	-29.6632	1.07709	-24.9834	35.8357	5.43052	9.61884	4.67983	4.35343
Annelida	BJ3	Litter | Soil	-29.9815	-2.48791	-25.0338	11.5317	5.54867	3.56509	4.94769	8.03658
Annelida	HO1	Litter	-28.4487	1.97209	-25.6308	38.814	5.66367	11.1046	2.81788	3.69158
Annelida	HR3	Litter | Soil	-30.064	1.53209	-23.0602	10.0558	5.74595	2.33153	7.00388	4.21386
Annelida	HJ3	Litter | Soil	-29.8546	-0.187909	-24.2643	43.2649	5.80975	13.6378	5.59032	5.99766
Annelida	HF3	Litter	-30.8969	0.644091	-26.0256	44.4758	5.83335	11.3933	4.87127	5.18926
Annelida	HR2	Soil	-29.6179	-1.35591	-24.0443	30.0031	5.87475	11.382	5.57365	7.23066
Annelida	BF4	Litter | Soil	-32.0349	-0.703909	-26.7364	47.1588	5.99195	9.48107	5.29851	6.69586
Annelida	HR1	Litter	-29.2332	0.621091	-23.8002		5.99775		5.43294	5.37666
Annelida	BJ2	Litter | Soil	-29.6834	-3.09891	-24.6283	44.2866	6.09075	14.0785	5.05512	9.18966
Annelida	HF4	Litter | Soil	-30.5505	0.553091	-26.0368	24.2567	6.14467	6.03512	4.5137	5.59158
Annelida	HO2	Litter | Soil	-30.4629	0.0450909	-24.8948	43.9868	6.18767	12.5134	5.56808	6.14258
Annelida	HR4	Litter | Soil	-29.6384	0.265758	-24.4551	27.191	6.18939	7.7851	5.18331	5.92363
Annelida	BR4	Litter | Soil	-30.062	-0.186909	-24.5433	43.1749	6.29075	13.4391	5.51879	6.47766
Annelida	HO3	Litter | Soil	-29.6632	1.07709	-24.9238	35.2892	6.36648	9.60125	4.73945	5.28939
Annelida	HR3	Litter | Soil	-30.064	1.53209	-23.9587	30.2234	6.37925	9.05263	6.10533	4.84716
Annelida	HR3	Litter | Soil	-30.064	1.53209	-23.5163	57.2162	6.47102	13.8735	6.5477	4.93893
Annelida	HO3	Litter | Soil	-29.6632	1.07709	-24.5853	47.0622	6.47373	13.2366	5.07788	5.39664
Annelida	HF3	Soil	-30.8969	0.644091	-25.5888	38.4713	6.86567	9.79047	5.30814	6.22158
Annelida	HO1	Soil	-28.4487	1.97209	-24.7222	34.085	7.05975	11.237	3.72641	5.08766
Annelida	BR3	Litter | Soil	-29.5816	-1.50491	-24.4943	43.8092	7.24675	13.8967	5.0874	8.75166
Annelida	HJ4	Litter | Soil	-29.8576	-1.15291	-24.8565	44.1235	7.68529	12.5151	5.0011	8.8382
Annelida	BO4	Litter | Soil	-33.2153	-1.10491	-25.8953	43.4037	7.77575	13.2343	7.32002	8.88066
Annelida	BF4	Litter | Soil	-32.0349	-0.703909
Annelida	HR4	Litter | Soil	-29.6384	0.265758	-23.9913	43.1514		13.6301	5.64713
Annelida	HJ4	Soil	-29.8576	-1.15291	-24.6983	39.6671		12.8969	5.15934
Annelida	HR3	Litter | Soil	-30.064	1.53209	-23.1663	38.5496		11.1347	6.8978
Annelida	HO4	Soil	-29.8435	0.147091	-24.6732	39.0496		11.1304	5.17024
Annelida	HO3	Soil	-29.6632	1.07709	-24.5772	36.4843		10.4514	5.08597
Araneae	HF3	Soil	-30.8969	0.644091	-25.857		1.42194		5.03993	0.777847
Araneae	HR2	Litter	-29.6179	-1.35591	-25.3725		2.10694		4.24539	3.46285
Araneae	BJ2	Soil	-29.6834	-3.09891	-25.7206		2.25594		3.96273	5.35485
Araneae	BF3	Soil	-32.1422	-0.687409	-25.9675		2.60094		6.17468	3.28835
Araneae	HO3	Litter	-29.6632	1.07709	-25.8856	54.4908	2.61735	1.26659	3.77758	1.54026
Araneae	HO2	Litter	-30.4629	0.0450909	-25.9655		2.81694		4.49741	2.77185
Araneae	BJ4	Soil	-30.343	-1.50791	-25.6266		2.82594		4.71639	4.33385
Araneae	BJ5	Litter	-30.2418	-2.30516	-26.6358		3.09967	7.16458	3.60602	5.40483
Araneae	BO4	Litter	-33.2153	-1.10491	-25.5047		3.13094		7.71053	4.23585
Araneae	BJ3	Soil	-29.9815	-2.48791	-25.6731		3.13394		4.30835	5.62185
Araneae	BJ3	Litter	-29.9815	-2.48791	-25.543		3.24994		4.43851	5.73785
Araneae	HJ1	Litter	-30.3027	0.428091	-25.5295		3.62194		4.7732	3.19385
Araneae	BJ4	Litter	-30.343	-1.50791	-26.0006		4.12594		4.34244	5.63385
Araneae	BO2	Litter	-30.1688	-0.0129091	-25.5109		4.13594		4.65785	4.14885
Araneae	HO4	Litter | Soil	-29.8435	0.147091	-25.6876		4.55594		4.15592	4.40885
Araneae	BJ2	Litter	-29.6834	-3.09891	-26.7798	52.2055	4.65167	4.51722	2.90359	7.75058
Araneae	BR2	Litter	-29.9372	-2.09691	-25.0564		4.72394		4.88074	6.82085
Araneae	BF4	Soil	-32.0349	-0.703909	-25.8456		4.80294		6.18932	5.50685
Araneae	HJ4	Litter	-29.8576	-1.15291	-26.0658	61.7442	5.02667	5.30022	3.79182	6.17958
Araneae	HR2	Soil	-29.6179	-1.35591	-25.6772		5.09594		3.94066	6.45185
Araneae	BR4	Litter	-30.062	-0.186909	-26.0192		5.19594		4.04287	5.38285
Araneae	HJ2	Litter	-30.9372	1.15409	-25.3219		5.19694		5.61531	4.04285
Araneae	BF1	Litter	-32.1422	-0.687409	-25.7991		5.23194		6.34306	5.91935
Araneae	HF4	Soil	-30.5505	0.553091	-25.9438		5.51194		4.60672	4.95885
Araneae	BF3	Litter	-32.1422	-0.687409	-25.8095		5.63494		6.33273	6.32235
Araneae	HF1	Litter	-30.7821	0.202091	-25.2992		5.87094	22.1492	5.48294	5.66885
Araneae	HO1	Litter | Soil	-28.4487	1.97209	-26.1555		5.91394		2.29314	3.94185
Araneae	HJ3	Litter | Soil	-29.8546	-0.187909	-25.1824		6.02094		4.67213	6.20885
Araneae	HF2	Litter	-31.5546	-0.660909	-26.6778		6.03867	13.7103	4.87678	6.69958
Araneae	HF3	Litter	-30.8969	0.644091	-25.7134		6.14494	28.4367	5.18352	5.50085
Araneae	HR1	Litter	-29.2332	0.621091	-25.2816		6.31094		3.95158	5.68985
Araneae	HR4	Litter	-29.6384	0.265758	-24.8085		6.63194		4.82989	6.36618
Araneae	BF2	Soil	-32.2495	-0.670909	-25.7341		6.79894		6.51539	7.46985
Araneae	BR1	Litter	-30.5444	-0.679909	-25.5346		6.82235	22.0296	5.00979	7.50226
Araneae	BO3	Litter	-28.4809	0.876091	-25.4815		7.099		2.99939	6.22291
Araneae	BF4	Litter	-32.0349	-0.703909	-26.388		7.16094		5.64699	7.86485
Araneae	HF4	Litter	-30.5505	0.553091	-25.8278	52.6379	7.25367	7.49438	4.7227	6.70058
Araneae	BF2	Litter	-32.2495	-0.670909	-26.0966		7.50935	18.6202	6.15281	8.18026
Araneae	BO5	Litter	-30.6942	0.177591	-24.3447		7.54994		6.34957	7.37235
Araneae	HR3	Litter	-30.064	1.53209	-25.5791		7.62594		4.48494	6.09385
Araneae	BR3	Litter | Soil	-29.5816	-1.50491	-25.1814		7.76394	17.046	4.40024	9.26885
Araneae	BJ5	Litter | Soil	-30.9594	-2.12591	-25.7938			7.97452	5.16556
Araneae	BF1	Soil	-32.1422	-0.687409	-25.9696				6.17261
Araneae	HJ1	Soil	-30.3027	0.428091	-24.9965				5.30623
Araneae	HR1	Soil	-29.2332	0.621091	-25.6824				3.55078
Araneae	BR1	Soil	-30.5444	-0.679909	-25.5832				4.96119
Araneae	HR3	Soil	-30.064	1.53209	-25.577				4.487
Araneae	BO5	Litter | Soil	-30.912	0.952091	-25.9892				4.92281
Araneae	BO4	Soil	-33.2153	-1.10491	-25.4304				7.78491
Araneae	BR4	Soil	-30.062	-0.186909	-25.6649				4.39718
Araneae	HJ2	Soil	-30.9372	1.15409	-25.8942				5.04303
Araneae	HF2	Soil	-31.5546	-0.660909	-25.8405				5.7141
Araneae	HR4	Soil	-29.6384	0.265758	-25.3632				4.27517
Araneae	HF1	Soil	-30.7821	0.202091	-26.0298	67.0363		0.532605	4.75233
Blattodea	BJ3	Litter	-29.9815	-2.48791	-26.5038		0.604667	2.98864	3.47769	3.09258
Blattodea	HF3	Litter	-30.8969	0.644091	-26.3698		1.01267	14	4.52714	0.368576
Blattodea	BF4	Litter	-32.0349	-0.703909	-27.9336	66.4379	1.12535	11.1625	4.1013	1.82926
Blattodea	HF2	Litter	-31.5546	-0.660909	-25.8178	43.2246	1.64867	9.29321	5.73678	2.30958
Blattodea	HF1	Litter	-30.7821	0.202091	-25.8648	42.3686	1.90467	10.0884	4.91733	1.70258
Blattodea	BF1	Litter	-32.1422	-0.687409	-26.4828		2.18067	2.86074	5.65942	2.86808
Blattodea	BR1	Litter | Soil	-30.5444	-0.679909	-25.2269		2.30294		5.31758	2.98285
Blattodea	BO5	Litter	-30.6942	0.177591	-26.6506		2.48935	14.2221	4.0436	2.31176
Blattodea	BJ4	Litter	-30.343	-1.50791	-26.3816		2.84135	15.4922	3.96137	4.34926
Blattodea	HJ3	Litter	-29.8546	-0.187909	-25.136		2.88294		4.71862	3.07085
Blattodea	HF4	Litter | Soil	-30.5505	0.553091	-26.2586		3.49735	15.5807	4.29183	2.94426
Blattodea	BR2	Litter	-29.9372	-2.09691	-25.5006		3.59371		4.43651	5.69061
Blattodea	HJ1	Litter	-30.3027	0.428091	-25.8788		3.60767	6.11632	4.42395	3.17958
Blattodea	BR3	Litter	-29.5816	-1.50491	-24.5233	64.8766	3.61575	14.4676	5.0584	5.12066
Blattodea	HJ2	Litter | Soil	-30.9372	1.15409	-26.4588	53.9292	3.61967	4.98051	4.47843	2.46558
Blattodea	HJ4	Litter	-29.8576	-1.15291	-24.6198	67.8082	3.71367	16.5993	5.23782	4.86658
Blattodea	BR4	Litter	-30.062	-0.186909			3.84794			4.03485
Blattodea	HR2	Litter	-29.6179	-1.35591	-25.0438		4.13667	19.9845	4.57413	5.49258
Blattodea	HR4	Litter	-29.6384	0.265758	-25.1918		4.95467	15.7997	4.4466	4.68891
Blattodea	HR1	Litter	-29.2332	0.621091	-24.7517		5.81094	25.2331	4.48151	5.18985
Blattodea	HR3	Litter	-30.064	1.53209	-25.7038		5.89767	6.85949	4.36027	4.36558
Blattodea	BF3	Litter | Soil	-32.1422	-0.687409	-25.3567	47.6885		10.1612	6.78549
Chilopoda	HO3	Soil	-29.6632	1.07709	-25.6	2.76	3.847	1.48	4.06322	2.76991
Chilopoda	HO4	Soil	-29.8435	0.147091	-26.72	45.26	4.73	13.68	3.12349	4.58291
Chilopoda	HO4	Litter	-29.8435	0.147091	-26.7527	48.7277	5.19873	13.8197	3.09084	5.05164
Chilopoda	HF4	Soil	-30.5505	0.553091	-26.23	53.03	5.231	12.18	4.32048	4.67791
Chilopoda	HO3	Litter	-29.6632	1.07709	-24.89	50.25	5.639	14.97	4.77322	4.56191
Chilopoda	HR4	Litter	-29.6384	0.265758	-24.36	52.62	5.702	14.22	5.27838	5.43624
Chilopoda	HF1	Litter	-30.7821	0.202091	-26.49	50.65	5.863	13.12	4.29211	5.66091
Chilopoda	BJ2	Soil	-29.6834	-3.09891	-25.53	50.37	5.914	14.14	4.15337	9.01291
Chilopoda	BJ4	Soil	-30.343	-1.50791	-27.023	57.7789	5.97482	11.3637	3.32001	7.48273
Chilopoda	HO4	Soil	-29.8435	0.147091	-27.73	50.65	6.236	11.29	2.11349	6.08891
Chilopoda	BO3	Soil	-28.4809	0.876091	-27.13	50.26	6.272	15.23	1.35089	5.39591
Chilopoda	HJ4	Soil	-29.8576	-1.15291	-24.83	80.72	6.273	18.91	5.02759	7.42591
Chilopoda	BJ2	Soil	-29.6834	-3.09891	-25.58	49.99	6.32	12.4	4.10337	9.41891
Chilopoda	BJ4	Soil	-30.343	-1.50791	-25.4873	51.8348	6.36951	14.543	4.85574	7.87742
Chilopoda	HJ2	Litter	-30.9372	1.15409	-26.0109	49.8418	6.3877	14.3403	4.92629	5.2336
Chilopoda	BR1	Soil	-30.5444	-0.679909	-24.37	52.72	6.461	15.08	6.17444	7.14091
Chilopoda	BR1	Soil	-30.5444	-0.679909	-24.0123	50.4985	6.61286	13.8334	6.53213	7.29277
Chilopoda	HJ1	Soil	-30.3027	0.428091	-25.0893	50.9785	6.64216	14.0509	5.21348	6.21407
Chilopoda	HF1	Soil	-30.7821	0.202091	-25.31	62.37	6.648	16.55	5.47211	6.44591
Chilopoda	HJ2	Litter	-30.9372	1.15409	-26.7409	53.378	6.75446	12.4785	4.19629	5.60037
Chilopoda	HJ1	Soil	-30.3027	0.428091	-25.2234	48.6868	6.82801	13.3081	5.07938	6.39992
Chilopoda	BJ2	Soil	-29.6834	-3.09891	-25.73	68.14	6.892	17.98	3.95337	9.99091
Chilopoda	BR1	Soil	-30.5444	-0.679909	-23.8103	51.1238	6.89897	14.583	6.73413	7.57888
Chilopoda	BO3	Litter	-28.4809	0.876091	-26.5908	55.1388	6.92416	16.0058	1.89008	6.04807
Chilopoda	BO5	Soil	-30.912	0.952091	-27.53	46.73	6.938	11.15	3.38203	5.98591
Chilopoda	BF2	Soil	-32.2495	-0.670909	-25.1462	49.4865	6.94178	13.8731	7.10329	7.61269
Chilopoda	HF4	Soil	-30.5505	0.553091	-26.14	981.35	6.966	271.62	4.41048	6.41291
Chilopoda	BJ2	Soil	-29.6834	-3.09891	-24.4133	48.7228	6.9835	13.762	5.2701	10.0824
Chilopoda	BO2	Soil	-30.1688	-0.0129091	-24.51	49.62	7.032	15.36	5.65879	7.04491
Chilopoda	BJ2	Soil	-29.6834	-3.09891	-27.08	60.56	7.033	11.42	2.60337	10.1319
Chilopoda	HJ2	Soil	-30.9372	1.15409	-25.77	46.82	7.081	10.04	5.16721	5.92691
Chilopoda	HJ4	Soil	-29.8576	-1.15291	-25.39	49.53	7.13	13.08	4.46759	8.28291
Chilopoda	HR4	Soil	-29.6384	0.265758	-23.483	47.9329	7.16047	11.7906	6.15543	6.89472
Chilopoda	HO2	Soil	-30.4629	0.0450909	-26.5746	51.4714	7.16564	12.4136	3.88823	7.12055
Chilopoda	BO5	Soil	-30.912	0.952091	-26.6211	51.0211	7.2974	13.4937	4.29089	6.34531
Chilopoda	BR1	Soil	-30.5444	-0.679909	-24.2583	50.6372	7.35226	14.1859	6.28615	8.03217
Chilopoda	HO2	Soil	-30.4629	0.0450909	-24.13	59.91	7.44	15.07	6.33286	7.39491
Chilopoda	BF1	Litter	-32.1422	-0.687409	-25.4664	51.1262	7.454	13.541	6.67576	8.14141
Chilopoda	BF1	Soil	-32.1422	-0.687409	-24.85	89.03	7.482	24.11	7.2922	8.16941
Chilopoda	HJ2	Soil	-30.9372	1.15409	-25.73	42.58	7.511	10.89	5.20721	6.35691
Chilopoda	BF3	Soil	-32.1422	-0.687409	-25.94	52.39	7.518	13.91	6.2022	8.20541
Chilopoda	BF2	Soil	-32.2495	-0.670909	-25.93	54.16	7.564	12.41	6.31946	8.23491
Chilopoda	HJ2	Soil	-30.9372	1.15409	-26.0751	51.0433	7.58401	13.3574	4.86211	6.42992
Chilopoda	BO5	Soil	-30.912	0.952091	-26.4692	53.4143	7.64896	13.1379	4.4428	6.69687
Chilopoda	BF4	Soil	-32.0349	-0.703909	-24.48	51.92	7.66	13.49	7.55494	8.36391
Chilopoda	HF1	Soil	-30.7821	0.202091	-25.6891	52.7591	7.66174	13.8284	5.09306	7.45965
Chilopoda	BJ2	Soil	-29.6834	-3.09891	-25.3		7.771		4.38337	10.8699
Chilopoda	HO3	Soil	-29.6632	1.07709	-25.6	56.42	7.779	14.53	4.06322	6.70191
Chilopoda	BF3	Litter	-32.1422	-0.687409	-24.87	33.21	7.91	8.77	7.2722	8.59741
Chilopoda	HO1	Soil	-28.4487	1.97209	-25.4753	49.2093	7.98075	13.9494	2.97337	6.00866
Chilopoda	HR1	Soil	-29.2332	0.621091	-24.0465	50.2676	8.13902	14.3888	5.18665	7.51792
Chilopoda	HJ4	Soil	-29.8576	-1.15291	-25.42	82.78	8.193	21.97	4.43759	9.34591
Chilopoda	HJ2	Soil	-30.9372	1.15409	-24.77	49.09	8.197	13.19	6.16721	7.04291
Chilopoda	HR3	Litter	-30.064	1.53209	-23.5254	47.5392	8.21142	13.3868	6.53861	6.67933
Chilopoda	HJ2	Soil	-30.9372	1.15409	-26.2084	51.7182	8.43872	13.5298	4.72879	7.28463
Chilopoda	HF4	Soil	-30.5505	0.553091	-26.0667	53.7842	8.5105	12.2721	4.48378	7.95741
Chilopoda	HF3	Soil	-30.8969	0.644091	-25.13	49.84	8.534	12.97	5.76692	7.88991
Chilopoda	HR3	Soil	-30.064	1.53209	-22.08	49.6	8.733	14.37	7.98405	7.20091
Chilopoda	HF3	Soil	-30.8969	0.644091	-25.5686	51.3515	8.75201	13.6037	5.32836	8.10792
Chilopoda	BO4	Soil	-33.2153	-1.10491	-26.84	50.6	8.894	14.04	6.37527	9.99891
Chilopoda	HR2	Soil	-29.6179	-1.35591	-24.69	49.35	8.911	10.57	4.9279	10.2669
Chilopoda	BF4	Soil	-32.0349	-0.703909	-25.1185	50.4765	8.91656	13.6532	6.91642	9.62047
Chilopoda	BR3	Soil	-29.5816	-1.50491	-25.0683	50.8828	8.98678	14.2267	4.51333	10.4917
Chilopoda	BF3	Soil	-32.1422	-0.687409	-26.38	52.29	9.496	14	5.7622	10.1834
Chilopoda	BO3	Soil	-28.4809	0.876091	-28.3612	54.1237	9.59883	11.914	0.119672	8.72273
Chilopoda	HJ2	Soil	-30.9372	1.15409	-26.0643	50.2791	9.78467	14.3546	4.87288	8.63058
Chilopoda	BF3	Soil	-32.1422	-0.687409	-26.1017	53.0266		12.0894	6.04049
Coleoptera	BJ3	Litter | Soil	-29.9815	-2.48791	-26.4629		-2.00559		3.51861	0.482321
Coleoptera	BR4	Soil	-30.062	-0.186909	-27.6368		-1.73959		2.4252	-1.55268
Coleoptera	BR1	Soil	-30.5444	-0.679909	-27.449		-1.70859		3.09548	-1.02868
Coleoptera	HR2	Soil	-29.6179	-1.35591	-27.4801		-1.17559		2.13781	0.180321
Coleoptera	HR3	Soil	-30.064	1.53209	-27.3908		-0.968588		2.67322	-2.50068
Coleoptera	BJ4	Litter | Soil	-30.343	-1.50791	-29.4118		-0.917071		0.931195	0.590838
Coleoptera	BR2	Soil	-29.9372	-2.09691	-27.5829		-0.286588		2.3543	1.81032
Coleoptera	BJ2	Soil	-29.6834	-3.09891	-27.6378		0.315929		2.04556	3.41484
Coleoptera	HR4	Soil	-29.6384	0.265758	-27.1828		0.920929		2.45559	0.655171
Coleoptera	HF3	Litter | Soil	-30.8969	0.644091	-27.5445		1.46441		3.35247	0.820321
Coleoptera	BO2	Soil	-30.1688	-0.0129091	-27.5528		1.49141		2.61603	1.50432
Coleoptera	HJ2	Soil	-30.9372	1.15409	-27.7905		1.85541		3.14675	0.701321
Coleoptera	HF4	Soil	-30.5505	0.553091	-27.8984		2.18341		2.65207	1.63032
Coleoptera	BO3	Soil	-28.4809	0.876091	-27.6244		2.19741		0.85651	1.32132
Coleoptera	HF2	Soil	-31.5546	-0.660909	-27.2759		2.42193	19.6108	4.27867	3.08284
Coleoptera	BJ5	Soil	-30.9594	-2.12591	-27.4725		4.49893	6.85963	3.48682	6.62484
Coleoptera	HJ4	Soil	-29.8576	-1.15291	-27.6503		4.58641		2.20727	5.73932
Coleoptera	HJ1	Soil	-30.3027	0.428091	-27.9462		4.92341		2.35657	4.49532
Coleoptera	HR1	Soil	-29.2332	0.621091	-27.1178		7.44141		2.11536	6.82032
Collembola	HJ4	Litter | Soil	-29.8576	-1.15291	-28.2516	44.5425	-4.55539	13.6487	1.60599	-3.40248
Collembola	HJ1	Litter | Soil	-30.3027	0.428091	-26.5963	47.1383	-3.00539	12.3565	3.70645	-3.43348
Collembola	BJ2	Litter | Soil	-29.6834	-3.09891	-27.8231	51.4157	-2.13095	6.22851	1.8603	0.967957
Collembola	BJ3	Soil	-29.9815	-2.48791	-27.5323		-2.02118		2.44914	0.466727
Collembola	HJ3	Litter | Soil	-29.8546	-0.187909	-26.9678	71.4966	-1.61039	3.5276	2.88678	-1.42248
Collembola	HJ1	Litter | Soil	-30.3027	0.428091	-27.0669	31.1501	-1.53839	4.34634	3.23586	-1.96648
Collembola	HR4	Litter | Soil	-29.6384	0.265758	-27.9585	108.787	-1.51239	10.1135	1.67986	-1.77815
Collembola	BJ2	Litter | Soil	-29.6834	-3.09891	-28.2592	45.0049	-0.954952	5.02024	1.42413	2.14396
Collembola	HF4	Litter | Soil	-30.5505	0.553091	-28.3078	59.8889	-0.694105	3.63984	2.24272	-1.2472
Collembola	BJ2	Litter | Soil	-29.6834	-3.09891	-27.1845	63.4262	-0.492389	2.97388	2.49885	2.60652
Collembola	BJ2	Litter | Soil	-29.6834	-3.09891	-27.8893	42.5379	-0.411952	4.1583	1.79409	2.68696
Collembola	HO2	Litter	-30.4629	0.0450909	-27.5354		-0.119182		2.92745	-0.164273
Collembola	BR1	Litter | Soil	-30.5444	-0.679909	-26.6081	85.0014	0.0550476	10.3949	3.93633	0.734957
Collembola	BF4	Litter | Soil	-32.0349	-0.703909	-27.8265	64.9832	0.129895	1.49119	4.20846	0.833804
Collembola	HJ1	Litter | Soil	-30.3027	0.428091	-26.6582	31.3814	0.234611	4.68873	3.64453	-0.19348
Collembola	HF4	Litter | Soil	-30.5505	0.553091	-27.7944	57.9363	0.326895	5.12922	2.75608	-0.226196
Collembola	BR3	Litter | Soil	-29.5816	-1.50491	-27.3166	55.2608	0.331611	7.51866	2.26503	1.83652
Collembola	HJ2	Soil	-30.9372	1.15409	-27.6793		0.367818		3.25787	-0.786273
Collembola	BJ3	Litter | Soil	-29.9815	-2.48791	-26.1205	42.8451	0.512611	12.0655	3.86094	3.00052
Collembola	HR2	Litter | Soil	-29.6179	-1.35591	-27.1577	58.5827	0.553611	3.77348	2.46022	1.90952
Collembola	BO4	Litter | Soil	-33.2153	-1.10491	-28.108	65.2945	0.566895	4.33896	5.10726	1.6718
Collembola	BJ2	Litter | Soil	-29.6834	-3.09891	-27.6107	53.7836	0.591611	7.87195	2.07263	3.69052
Collembola	BO4	Litter | Soil	-33.2153	-1.10491	-27.0369	59.1016	0.595611	2.87194	6.17832	1.70052
Collembola	BF3	Litter | Soil	-32.1422	-0.687409	-27.9207	80.1687	0.645895	1.25092	4.22153	1.3333
Collembola	BJ4	Soil	-30.343	-1.50791	-27.6357		0.650929		2.7073	2.15884
Collembola	HF1	Litter | Soil	-30.7821	0.202091	-27.9672	63.896	0.658895	2.91976	2.81487	0.456804
Collembola	BF3	Litter | Soil	-32.1422	-0.687409	-27.3349	58.427	0.758895	3.06604	4.80734	1.4463
Collembola	HF1	Litter | Soil	-30.7821	0.202091	-27.991	56.1129	0.761895	2.80219	2.79106	0.559804
Collembola	BJ2	Litter | Soil	-29.6834	-3.09891	-27.7789	64.8479	0.785611	7.3085	1.90442	3.88452
Collembola	HF3	Litter | Soil	-30.8969	0.644091	-27.7406	69.2958	1.03089	5.00919	3.15634	0.386804
Collembola	HF1	Litter | Soil	-30.7821	0.202091	-27.7996	55.8914	1.10789	3.55298	2.98254	0.905804
Collembola	BR1	Litter | Soil	-30.5444	-0.679909	-27.8625	50.9979	1.13661	5.95414	2.68189	1.81652
Collembola	HJ2	Litter | Soil	-30.9372	1.15409	-27.7621	66.7663	1.17605	6.06107	3.1751	0.0219567
Collembola	HF4	Litter | Soil	-30.5505	0.553091	-27.901	76.2074	1.26589	3.67707	2.64947	0.712804
Collembola	HO2	Litter | Soil	-30.4629	0.0450909	-26.6691	43.6735	1.42005	6.12916	3.79379	1.37496
Collembola	BR2	Litter | Soil	-29.9372	-2.09691	-27.6221	62.2084	1.42161	8.56583	2.31507	3.51852
Collembola	BR3	Soil	-29.5816	-1.50491	-27.5478		1.45182		2.0339	2.95673
Collembola	HJ2	Litter | Soil	-30.9372	1.15409	-27.7212	61.6612	1.53861	5.35857	3.21605	0.38452
Collembola	BJ4	Litter	-30.343	-1.50791	-27.7832		1.57093		2.55982	3.07884
Collembola	BF4	Litter | Soil	-32.0349	-0.703909	-28.1184	80.7308	1.77889	4.60196	3.91659	2.4828
Collembola	BF4	Litter | Soil	-32.0349	-0.703909	-27.233	59.1645	1.77961	1.46957	4.80192	2.48352
Collembola	BR1	Litter | Soil	-30.5444	-0.679909	-27.0054	50.1078	1.85905	6.76571	3.53905	2.53896
Collembola	HO2	Soil	-30.4629	0.0450909	-27.9349		2.02693		2.52799	1.98184
Collembola	HJ2	Litter | Soil	-30.9372	1.15409	-28.0101	52.5675	2.06905	2.75825	2.92706	0.914957
Collembola	BJ4	Litter | Soil	-30.343	-1.50791	-27.251	44.5166	2.11689	4.87896	3.09199	3.6248
Collembola	HO1	Litter | Soil	-28.4487	1.97209	-26.8463	51.2005	2.13689	3.59213	1.60232	0.164804
Collembola	HJ2	Litter | Soil	-30.9372	1.15409	-27.8017	62.4146	2.28661	4.26008	3.13555	1.13252
Collembola	HJ1	Litter | Soil	-30.3027	0.428091	-26.587	38.3898	2.29061	5.56911	3.71574	1.86252
Collembola	HJ3	Soil	-29.8546	-0.187909	-28.0719		2.48693	4.09643	1.78268	2.67484
Collembola	HJ3	Litter | Soil	-29.8546	-0.187909	-27.1278	54.0119	2.55161	4.58574	2.72682	2.73952
Collembola	BR1	Litter | Soil	-30.5444	-0.679909	-27.6892	73.3145	2.56861	6.397	2.85527	3.24852
Collembola	HJ1	Litter | Soil	-30.3027	0.428091	-26.8729	63.9289	2.60061	3.97434	3.42988	2.17252
Collembola	HJ1	Litter | Soil	-30.3027	0.428091	-26.5921	41.4173	2.65661	5.64253	3.71058	2.22852
Collembola	BJ3	Litter | Soil	-29.9815	-2.48791	-26.9337	59.9402	2.75061	7.81783	3.04773	5.23852
Collembola	HR2	Litter | Soil	-29.6179	-1.35591	-27.3486	50.858	2.80361	5.74048	2.2693	4.15952
Collembola	HO2	Litter | Soil	-30.4629	0.0450909	-27.8555	53.6579	2.82189	3.975	2.6074	2.7768
Collembola	HF1	Litter | Soil	-30.7821	0.202091	-28.2902	61.532	2.82989	3.4291	2.49195	2.6278
Collembola	BJ2	Litter | Soil	-29.6834	-3.09891	-27.2506	49.8077	2.86261	7.39175	2.4328	5.96152
Collembola	BR1	Litter | Soil	-30.5444	-0.679909	-26.7831	49.0259	2.87561	8.50169	3.76137	3.55552
Collembola	BR3	Litter | Soil	-29.5816	-1.50491	-26.717	49.5553	2.90661	9.1511	2.86463	4.41152
Collembola	HF3	Litter | Soil	-30.8969	0.644091	-27.6257	65.1965	2.93989	1.8912	3.27123	2.2958
Collembola	HF4	Litter | Soil	-30.5505	0.553091	-27.6236	57.8302	2.98589	8.55607	2.92685	2.4328
Collembola	BJ2	Litter | Soil	-29.6834	-3.09891	-24.8863	10.1577	2.99161	3.01315	4.79711	6.09052
Collembola	BR3	Litter | Soil	-29.5816	-1.50491	-27.1897	50.8217	3.02761	7.56399	2.39197	4.53252
Collembola	HR1	Litter | Soil	-29.2332	0.621091	-26.0049	47.2079	3.05861	7.54235	3.22825	2.43752
Collembola	BR3	Litter | Soil	-29.5816	-1.50491	-27.3575	49.5261	3.07105	6.02608	2.22417	4.57596
Collembola	BF1	Litter | Soil	-32.1422	-0.687409	-27.8037	58.0188	3.09589	1.12951	4.33849	3.7833
Collembola	HR1	Litter | Soil	-29.2332	0.621091	-26.9162	69.0275	3.13961	6.96632	2.31699	2.51852
Collembola	HR4	Soil	-29.6384	0.265758	-27.4501		3.16082		2.18829	2.89506
Collembola	HR1	Litter | Soil	-29.2332	0.621091	-25.7077	50.2551	3.18761	7.01561	3.52547	2.56652
Collembola	HF2	Litter | Soil	-31.5546	-0.660909	-27.8441	50.6422	3.21889	1.83974	3.71048	3.8798
Collembola	BJ2	Litter | Soil	-29.6834	-3.09891	-27.297	46.8221	3.23061	5.10975	2.38636	6.32952
Collembola	HO1	Litter | Soil	-28.4487	1.97209	-28.1391	62.9698	3.27889	2.17827	0.309607	1.3068
Collembola	BR2	Litter | Soil	-29.9372	-2.09691	-27.2134	42.684	3.31961	4.7893	2.72374	5.41652
Collembola	BR3	Litter | Soil	-29.5816	-1.50491	-26.2487	169.669	3.40105	21.8202	3.33298	4.90596
Collembola	HF1	Litter | Soil	-30.7821	0.202091	-28.107	57.8396	3.45089	2.03575	2.67514	3.2488
Collembola	HR2	Litter | Soil	-29.6179	-1.35591	-26.9389	53.4164	3.48261	5.4076	2.679	4.83852
Collembola	BF2	Litter | Soil	-32.2495	-0.670909	-27.8907	53.1048	3.53789	1.72514	4.3588	4.2088
Collembola	HR4	Litter | Soil	-29.6384	0.265758	-27.393	67.3282	3.53961	5.5263	2.2454	3.27385
Collembola	HR1	Litter | Soil	-29.2332	0.621091	-26.5385	51.9416	3.58261	6.63827	2.69471	2.96152
Collembola	HF4	Litter	-30.5505	0.553091	-28.0384		3.58793	5.44016	2.51206	3.03484
Collembola	BO4	Litter | Soil	-33.2153	-1.10491	-27.6598	58.8658	3.60389	3.21821	5.55542	4.7088
Collembola	BF1	Litter | Soil	-32.1422	-0.687409	-27.5977	60.7052	3.60489	4.12835	4.54445	4.2923
Collembola	BF3	Litter | Soil	-32.1422	-0.687409	-27.3939	58.7849	3.61289	3.37778	4.74835	4.3003
Collembola	BR1	Soil	-30.5444	-0.679909	-28.2157	11.5931	3.619	1.21342	2.32873	4.29891
Collembola	BO4	Litter	-33.2153	-1.10491	-27.5354		3.62482		5.67985	4.72973
Collembola	HJ1	Litter | Soil	-30.3027	0.428091	-25.6788	37.2212	3.62561	8.00384	4.6239	3.19752
Collembola	HJ4	Litter | Soil	-29.8576	-1.15291	-27.7253	61.5051	3.69661	3.95198	2.13231	4.84952
Collembola	BF1	Litter | Soil	-32.1422	-0.687409	-27.5853	56.5906	3.70889	5.57751	4.55687	4.3963
Collembola	HJ2	Litter | Soil	-30.9372	1.15409	-27.7779	52.2548	3.71161	8.57394	3.15929	2.55752
Collembola	HJ4	Litter	-29.8576	-1.15291	-27.5735		3.71182		2.28414	4.86473
Collembola	BO3	Soil	-28.4809	0.876091	-27.7382		3.78193		0.742667	2.90584
Collembola	HJ2	Litter	-30.9372	1.15409	-27.8459		3.79782		3.09133	2.64373
Collembola	HO2	Litter | Soil	-30.4629	0.0450909	-27.9072	59.7356	3.83489	3.81555	2.55565	3.7898
Collembola	BJ5	Litter | Soil	-30.9594	-2.12591	-27.8865	46.0009	3.88689	2.51588	3.07285	6.0128
Collembola	HR2	Litter | Soil	-29.6179	-1.35591	-27.5908	44.9935	3.91805	3.99087	2.02711	5.27396
Collembola	HF1	Litter | Soil	-30.7821	0.202091	-27.4549	49.7891	3.97689	4.90654	3.32719	3.7748
Collembola	BF3	Litter | Soil	-32.1422	-0.687409	-28.0625	69.9536	3.97889	0.649329	4.07974	4.6663
Collembola	HR1	Soil	-29.2332	0.621091	-26.5483	36.8357	3.983	7.93644	2.68489	3.36191
Collembola	BJ5	Litter | Soil	-30.9594	-2.12591	-26.8425	52.0755	4.03005	8.89298	4.11688	6.15596
Collembola	BR1	Litter | Soil	-30.5444	-0.679909	-26.4074	65.8301	4.03361	11.2776	4.13701	4.71352
Collembola	HR4	Litter	-29.6384	0.265758	-26.6733	20.7105	4.039	3.02809	2.96513	3.77324
Collembola	HR2	Soil	-29.6179	-1.35591	-27.801		4.10093	5.21669	1.81692	5.45684
Collembola	HR2	Litter | Soil	-29.6179	-1.35591	-27.4064	53.7601	4.15761	5.8498	2.21151	5.51352
Collembola	HF1	Litter | Soil	-30.7821	0.202091	-27.9134	56.0396	4.23189	1.20769	2.86869	4.0298
Collembola	HR3	Litter | Soil	-30.064	1.53209	-26.7248	42.8974	4.40105	3.16098	3.33928	2.86896
Collembola	HO2	Litter | Soil	-30.4629	0.0450909	-27.7369	50.4767	4.40705	4.19855	2.72598	4.36196
Collembola	HR2	Litter | Soil	-29.6179	-1.35591	-26.1587	51.4819	4.55061	8.59064	3.45919	5.90652
Collembola	HO3	Litter | Soil	-29.6632	1.07709	-27.6857	72.8419	4.56889	6.27318	1.9775	3.4918
Collembola	BJ5	Litter | Soil	-30.9594	-2.12591	-27.2815	59.7505	4.62961	4.57171	3.67784	6.75552
Collembola	BJ2	Litter | Soil	-29.6834	-3.09891	-27.6143	53.2415	4.67389	4.27857	2.06906	7.7728
Collembola	HR4	Litter | Soil	-29.6384	0.265758	-27.1711	52.0356	4.67961	3.18174	2.46728	4.41385
Collembola	BF2	Litter	-32.2495	-0.670909	-27.8556	20.6157	4.734	2.42499	4.3939	5.40491
Collembola	BF2	Litter | Soil	-32.2495	-0.670909	-28.0066	55.6724	4.76389	3.43219	4.24288	5.4348
Collembola	BR1	Litter | Soil	-30.5444	-0.679909	-26.7222	46.4328	4.78461	5.24724	3.82225	5.46452
Collembola	HO1	Litter | Soil	-28.4487	1.97209	-27.2831	60.5139	4.86089	5.28161	1.16555	2.8888
Collembola	HO4	Litter | Soil	-29.8435	0.147091	-26.4137	32.4291	4.88205	6.37476	3.42982	4.73496
Collembola	HJ4	Litter | Soil	-29.8576	-1.15291	-26.7143	162.584	4.88305	11.7678	3.14333	6.03596
Collembola	HO1	Soil	-28.4487	1.97209	-27.9851		4.90493	4.23098	0.463584	2.93284
Collembola	BF1	Litter	-32.1422	-0.687409	-28.0489		4.94193	27.2581	4.09332	5.62934
Collembola	BO5	Litter | Soil	-30.912	0.952091	-27.192	49.4107	4.94689	3.32093	3.72	3.9948
Collembola	HR3	Litter | Soil	-30.064	1.53209	-26.0514	51.6205	5.02661	6.6748	4.01267	3.49452
Collembola	BO5	Litter | Soil	-30.912	0.952091	-27.8503	47.7824	5.06589	3.4901	3.06174	4.1138
Collembola	HF3	Litter | Soil	-30.8969	0.644091	-26.4323	50.5696	5.09489	7.66727	4.46458	4.4508
Collembola	HJ3	Litter | Soil	-29.8546	-0.187909	-27.3311	101.367	5.10361	4.76954	2.52351	5.29152
Collembola	BF3	Litter | Soil	-32.1422	-0.687409	-27.5605	56.199	5.11089	2.85234	4.58171	5.7983
Collembola	HJ3	Litter | Soil	-29.8546	-0.187909	-28.0008	54.605	5.12661	2.25063	1.85374	5.31452
Collembola	BO2	Litter | Soil	-30.1688	-0.0129091	-27.547	63.0973	5.14389	2.34116	2.62175	5.1568
Collembola	HJ1	Soil	-30.3027	0.428091	-27.9353		5.14482		2.36742	4.71673
Collembola	HO3	Litter | Soil	-29.6632	1.07709	-28.4092	63.0441	5.15189	1.82665	1.25403	4.0748
Collembola	HR3	Soil	-30.064	1.53209	-26.7403		5.16593	22.6428	3.32371	3.63384
Collembola	HF2	Litter | Soil	-31.5546	-0.660909	-28.2043	56.0375	5.16689	1.2302	3.3503	5.8278
Collembola	HR1	Litter | Soil	-29.2332	0.621091	-25.3125	45.0502	5.19661	9.20758	3.92072	4.57552
Collembola	BO3	Litter | Soil	-28.4809	0.876091	-27.3742	47.7139	5.24089	8.79678	1.1067	4.3648
Collembola	HO2	Litter | Soil	-30.4629	0.0450909	-27.8451	62.1933	5.26305	4.29053	2.61772	5.21796
Collembola	HF4	Soil	-30.5505	0.553091	-28.0268		5.26582		2.52368	4.71273
Collembola	HO4	Litter | Soil	-29.8435	0.147091	-25.9418	102.686	5.33005	11.9217	3.90172	5.18296
Collembola	HJ3	Litter | Soil	-29.8546	-0.187909	-27.1143	44.3647	5.34361	3.65835	2.74023	5.53152
Collembola	BO3	Litter | Soil	-28.4809	0.876091	-27.7633	66.5363	5.35789	4.41126	0.717539	4.4818
Collembola	BF3	Soil	-32.1422	-0.687409	-27.9353		5.43582		4.20689	6.12323
Collembola	BR1	Litter | Soil	-30.5444	-0.679909	-26.5529	49.6778	5.45661	7.39689	3.9915	6.13652
Collembola	HR1	Litter	-29.2332	0.621091	-28.0551	11.7162	5.475	0.83263	1.17814	4.85391
Collembola	HO1	Litter | Soil	-28.4487	1.97209	-27.6919	55.5454	5.48489	4.77395	0.756727	3.5128
Collembola	BF1	Litter | Soil	-32.1422	-0.687409	-27.7447	62.9428	5.50789	3.06167	4.39748	6.1953
Collembola	BF3	Litter | Soil	-32.1422	-0.687409	-27.3081	60.9575	5.59505	1.02646	4.83412	6.28246
Collembola	HO2	Litter | Soil	-30.4629	0.0450909	-27.7044	51.1309	5.66189	2.93988	2.75851	5.6168
Collembola	BO4	Litter | Soil	-33.2153	-1.10491	-27.1237	63.4573	5.70789	5.19551	6.09155	6.8128
Collembola	HJ1	Litter	-30.3027	0.428091	-27.1962	17.7235	5.711	2.19869	3.10658	5.28291
Collembola	HF4	Litter | Soil	-30.5505	0.553091	-27.7261	64.9394	5.71489	0.799296	2.82439	5.1618
Collembola	BF2	Litter | Soil	-32.2495	-0.670909	-28.1194	75.6411	5.76389	2.44449	4.13007	6.4348
Collembola	HJ3	Litter	-29.8546	-0.187909	-28.0114		5.88582		1.84319	6.07373
Collembola	HR4	Litter | Soil	-29.6384	0.265758	-27.4374	64.2164	5.90261	5.14095	2.20102	5.63685
Collembola	HO1	Litter | Soil	-28.4487	1.97209	-27.4394	49.8334	5.92489	6.93883	1.00927	3.9528
Collembola	HO1	Litter | Soil	-28.4487	1.97209	-28.1463	61.9044	5.99889	1.12979	0.302362	4.0268
Collembola	BJ3	Litter | Soil	-29.9815	-2.48791	-27.1465	44.818	6.00989	5.59728	2.83498	8.4978
Collembola	HR1	Litter | Soil	-29.2332	0.621091	-25.9791	53.3533	6.05861	6.88988	3.25405	5.43752
Collembola	HR3	Litter | Soil	-30.064	1.53209	-26.136	54.4386	6.14761	6.9888	3.92804	4.61552
Collembola	BJ5	Litter | Soil	-30.9594	-2.12591	-27.5439	38.455	6.21989	3.27059	3.41543	8.3458
Collembola	BF1	Litter | Soil	-32.1422	-0.687409	-27.8524	55.4676	6.24889	3.19294	4.28984	6.9363
Collembola	BO5	Litter | Soil	-30.912	0.952091	-26.8782	54.433	6.25305	1.23502	4.03381	5.30096
Collembola	HF4	Litter | Soil	-30.5505	0.553091	-27.4518	57.0026	6.37289	2.93188	3.09866	5.8198
Collembola	HF2	Litter	-31.5546	-0.660909	-28.0782		6.47582		3.47636	7.13673
Collembola	HR3	Litter | Soil	-30.064	1.53209	-25.6148	51.2085	6.48861	8.3977	4.4492	4.95652
Collembola	HJ4	Soil	-29.8576	-1.15291	-28.0039		6.54293	4.09381	1.85369	7.69584
Collembola	HO1	Litter | Soil	-28.4487	1.97209	-26.9271	47.0875	6.56389	8.34799	1.52159	4.5918
Collembola	BO5	Litter | Soil	-30.912	0.952091	-26.7842	47.8443	6.77189	4.61148	4.12779	5.8198
Collembola	HO3	Soil	-29.6632	1.07709	-28.6987	10.9149	6.871	0.859452	0.964521	5.79391
Collembola	BR3	Litter | Soil	-29.5816	-1.50491	-26.1195	50.1969	6.93361	8.58409	3.46215	8.43852
Collembola	BO3	Litter | Soil	-28.4809	0.876091	-27.3618	57.0403	6.99989	3.64563	1.11912	6.1238
Collembola	HR2	Litter	-29.6179	-1.35591	-27.9973	19.6344	7.012	1.37741	1.6206	8.36791
Collembola	BO2	Litter | Soil	-30.1688	-0.0129091	-26.0142	60.1768	7.04389	6.52271	4.15459	7.0568
Collembola	HO1	Litter	-28.4487	1.97209	-28.1212	15.3841	7.088	1.14246	0.327458	5.11591
Collembola	BR2	Litter | Soil	-29.9372	-2.09691	-27.7356	67.6594	7.15561	4.62208	2.20155	9.25252
Collembola	BF1	Litter | Soil	-32.1422	-0.687409	-27.6578	73.6798	7.22989	2.7213	4.48442	7.9173
Collembola	HF2	Litter | Soil	-31.5546	-0.660909	-28.0407	57.687	7.35889	1.11424	3.51383	8.0198
Collembola	BJ2	Litter | Soil	-29.6834	-3.09891	-27.5375	46.4322	7.53561	3.61716	2.1459	10.6345
Collembola	BR4	Litter | Soil	-30.062	-0.186909	-26.5963	47.9713	7.56561	5.98404	3.46576	7.75252
Collembola	BJ4	Litter | Soil	-30.343	-1.50791	-26.4365	50.6568	7.59789	8.3031	3.90654	9.1058
Collembola	BO5	Litter	-30.912	0.952091	-27.9816	18.8932	7.802	1.68137	2.93047	6.84991
Collembola	BJ3	Litter | Soil	-29.9815	-2.48791	-26.6081	65.6102	7.80405	5.98237	3.37336	10.292
Collembola	BR4	Litter | Soil	-30.062	-0.186909	-28.5106	52.8442	8.06061	1.5631	1.5514	8.24752
Collembola	BR2	Litter | Soil	-29.9372	-2.09691	-26.588	49.1197	8.14061	7.75462	3.34913	10.2375
Collembola	BF4	Soil	-32.0349	-0.703909	-28.074	11.6784	8.159	0.637474	3.96099	8.86291
Collembola	BF1	Litter | Soil	-32.1422	-0.687409	-26.7635	55.4407	8.29489	3.81976	5.37866	8.9823
Collembola	BR3	Litter | Soil	-29.5816	-1.50491	-26.5478	50.381	8.50461	6.72249	3.03387	10.0095
Collembola	BR4	Soil	-30.062	-0.186909	-25.6054	17.6373	8.908	2.55756	4.45663	9.09491
Collembola	BF3	Litter	-32.1422	-0.687409	-28.7628	14.9796	9.176	0.987688	3.37945	9.86341
Collembola	BF4	Litter | Soil	-32.0349	-0.703909	-27.5864	72.073	9.19989	2.42084	4.44858	9.9038
Collembola	HR3	Litter | Soil	-30.064	1.53209	-27.9018	57.3821	9.69661	1.84899	2.16229	8.16452
Collembola	HF3	Litter	-30.8969	0.644091	-28.4299	11.8699	9.735	0.780216	2.46702	9.09091
Collembola	BJ5	Litter | Soil	-30.9594	-2.12591	-26.716	73.9879	9.74961	6.76596	4.24337	11.8755
Collembola	BJ5	Litter | Soil	-30.9594	-2.12591	-27.044	44.3582	9.80789	5.85168	3.91534	11.9338
Collembola	HJ4	Litter | Soil	-29.8576	-1.15291	-26.7913	67.2531	10.0976	5.94856	3.06627	11.2505
Collembola	HF1	Litter	-30.7821	0.202091	-28.5748	11.1146	10.528	0.675071	2.20731	10.3259
Collembola	BO5	Soil	-30.912	0.952091	-26.5725	37.2394	10.614	6.82145	4.33957	9.66191
Collembola	BR4	Litter	-30.062	-0.186909	-27.8377	12.0329	10.787	0.909528	2.22433	10.9739
Collembola	BF4	Litter | Soil	-32.0349	-0.703909	-27.2127	62.3856	11.0609	4.32471	4.82222	11.7648
Collembola	HF2	Soil	-31.5546	-0.660909	-28.1181	22.3671	11.092	1.64103	3.4365	11.7529
Collembola	BR3	Litter | Soil	-29.5816	-1.50491	-27.1917	68.005	11.4696	4.50493	2.38991	12.9745
Collembola	BR3	Litter | Soil	-29.5816	-1.50491	-27.6128	78.2778	11.6076	3.00101	1.96885	13.1125
Collembola	BF4	Litter | Soil	-32.0349	-0.703909	-27.0326	51.1188	13.3829	6.36112	5.00231	14.0868
Collembola	BF2	Litter | Soil	-32.2495	-0.670909	-27.7613	59.4628	14.9039	0.816171	4.48818	15.5748
Diplopoda	HF2	Litter	-31.5546	-0.660909			-1.809			-1.14809
Diplopoda	BO3	Litter	-28.4809	0.876091	-26.0569		-1.53	26.243	2.42399	-2.40609
Diplopoda	HJ4	Litter	-29.8576	-1.15291	-26.3278	7.73633	-0.506333	1.15208	3.52982	0.646576
Diplopoda	HO3	Litter | Soil	-29.6632	1.07709	-26.7268	59.9515	0.887667	7.76018	2.93645	-0.189424
Diplopoda	HO4	Litter | Soil	-29.8435	0.147091	-26.8948	35.2082	0.952667	6.09249	2.94872	0.805576
Diplopoda	HJ3	Litter	-29.8546	-0.187909	-26.0422		1		3.81237	1.18791
Diplopoda	BF1	Litter | Soil	-32.1422	-0.687409	-26.8356		1.01735	26.6285	5.30655	1.70476
Diplopoda	BO5	Litter	-30.6942	0.177591	-26.7228	52.0304	1.20767	4.94768	3.97146	1.03008
Diplopoda	HJ4	Soil	-29.8576	-1.15291	-26.1208	38.1914	1.32567	3.81446	3.73682	2.47858
Diplopoda	BO5	Litter	-30.912	0.952091	-26.3278	34.1719	1.47867	2.58843	4.58425	0.526576
Diplopoda	HF1	Litter | Soil	-30.7821	0.202091	-26.8538		1.51267	15.808	3.92833	1.31058
Diplopoda	BR4	Litter | Soil	-30.062	-0.186909	-25.4406		1.818		4.62148	2.00491
Diplopoda	HR2	Litter	-29.6179	-1.35591	-26.6736		2.01035	11.9226	2.94426	3.36626
Diplopoda	BR3	Litter	-29.5816	-1.50491	-25.6474		2.065		3.93425	3.56991
Diplopoda	BJ2	Litter	-29.6834	-3.09891			2.11493			5.21384
Diplopoda	BJ3	Litter	-29.9815	-2.48791	-25.0168	6.00436	2.12367	0.896733	4.96469	4.61158
Diplopoda	BO2	Litter | Soil	-30.1688	-0.0129091	-25.9309		2.166		4.23788	2.17891
Diplopoda	BR1	Litter | Soil	-30.5444	-0.679909	-26.1348	69.8611	2.23167	4.93888	4.40966	2.91158
Diplopoda	HJ1	Litter	-30.3027	0.428091	-25.9813		2.266		4.32143	1.83791
Diplopoda	BO5	Soil	-30.912	0.952091			2.285			1.33291
Diplopoda	HJ2	Soil	-30.9372	1.15409	-27.2128		2.33967	11.2371	3.72443	1.18558
Diplopoda	BF4	Litter	-32.0349	-0.703909	-26.3508	35.6932	2.37367	5.5762	5.68417	3.07758
Diplopoda	HJ2	Litter	-30.9372	1.15409	-26.9526		2.505	15.5686	3.98465	1.35091
Diplopoda	BJ4	Litter	-30.343	-1.50791	-25.6212		2.587		4.72186	4.09491
Diplopoda	BF3	Soil	-32.1422	-0.687409	-26.563		2.612	13.7551	5.5792	3.29941
Diplopoda	BR3	Soil	-29.5816	-1.50491	-26.1588		2.646		3.4229	4.15091
Diplopoda	HR4	Litter | Soil	-29.6384	0.265758	-24.6758	11.6376	2.97867	2.31259	4.9626	2.71291
Diplopoda	BO5	Litter | Soil	-30.912	0.952091	-27.7034	43.3553	3.02067	7.89787	3.20861	2.06858
Diplopoda	BF3	Litter	-32.1422	-0.687409	-27.0878	29.6369	3.11767	4.43419	5.05442	3.80508
Diplopoda	BJ2	Soil	-29.6834	-3.09891	-26.5396		3.12535	1.80637	3.14372	6.22426
Diplopoda	HR2	Soil	-29.6179	-1.35591	-25.1236		3.13194		4.49435	4.48785
Diplopoda	HJ1	Soil	-30.3027	0.428091	-25.3678	26.6401	3.26667	4.71906	4.93495	2.83858
Diplopoda	HR1	Litter | Soil	-29.2332	0.621091	-25.2748	60.6016	3.84067	6.72058	3.95841	3.21958
Diplopoda	HO2	Litter | Soil	-30.4629	0.0450909	-27.1636		3.87035	11.1113	3.29921	3.82526
Diplopoda	BJ4	Soil	-30.343	-1.50791	-25.849		3.937		4.49401	5.44491
Diplopoda	BF2	Soil	-32.2495	-0.670909	-26.3246	55.8308	3.98935	4.62379	5.92481	4.66026
Diplopoda	BF2	Litter	-32.2495	-0.670909			4.267			4.93791
Diplopoda	BJ3	Soil	-29.9815	-2.48791	-26.5606		4.79635	16.8314	3.42082	7.28426
Diplopoda	HF3	Soil	-30.8969	0.644091	-26.7648	63.7663	5.25267	9.59208	4.13214	4.60858
Diplopoda	HR3	Litter | Soil	-30.064	1.53209	-26.1358		5.35767	9.79534	3.92827	3.82558
Diplopoda	HJ3	Soil	-29.8546	-0.187909	-25.5718		5.528		4.28277	5.71591
Diplopoda	BF2	Litter | Soil	-32.2495	-0.670909	-26.0165	15.9498	5.65974	2.67562	6.23296	6.33065
Diplopoda	HF3	Litter	-30.8969	0.644091	-26.2638	43.69	6.06067	6.33516	4.63314	5.41658
Diplura	BJ3	Litter | Soil	-29.9815	-2.48791	-25.9023	45.1297	6.07886	12.7089	4.07914	8.56677
Diplura	BF4	Litter | Soil	-32.0349	-0.703909	-27.249	15.3699	6.54524	2.4381	4.78591	7.24915
Diplura	HF2	Litter | Soil	-31.5546	-0.660909	-25.6782	46.7681	6.60367	10.8519	5.87639	7.26458
Diplura	BJ4	Litter | Soil	-30.343	-1.50791	-25.9778	49.0926	7.86667	13.1526	4.36524	9.37458
Diplura	BR3	Litter | Soil	-29.5816	-1.50491	-25.4741	46.8998	8.19567	12.5134	4.10753	9.70058
Diplura	BO2	Litter | Soil	-30.1688	-0.0129091	-25.5938	49.5669	8.21771	12.5045	4.57496	8.23061
Diplura	HJ1	Litter | Soil	-30.3027	0.428091	-25.4282	30.3009	8.23175	8.25777	4.87448	7.80366
Diplura	BO5	Litter | Soil	-30.912	0.952091	-25.9568	47.7578	8.35467	10.7838	4.95527	7.40258
Diplura	BR1	Litter | Soil	-30.5444	-0.679909	-23.7306	47.0319	8.43335	12.5744	6.81379	9.11326
Diplura	BF2	Litter	-32.2495	-0.670909	-26.7131	60.6533	8.48471	11.7148	5.53639	9.15561
Diplura	BJ2	Litter | Soil	-29.6834	-3.09891	-25.1806	49.7456	8.52935	13.4883	4.50272	11.6283
Diplura	HF1	Litter | Soil	-30.7821	0.202091	-25.6686	48.1057	8.74735	11.8539	5.11346	8.54526
Diplura	BO5	Litter	-30.912	0.952091	-27.6187		8.91071	10.8293	3.2933	7.95861
Diplura	BF1	Litter | Soil	-32.1422	-0.687409	-25.7079	49.559	9.17771	11.6987	6.43425	9.86511
Diplura	HR2	Litter | Soil	-29.6179	-1.35591	-24.8148	45.8413	9.19867	12.6741	4.80313	10.5546
Diplura	BO5	Litter | Soil	-30.912	0.952091	-25.1702	43.8848	9.42667	10.5579	5.74181	8.47458
Diplura	HO2	Litter | Soil	-30.4629	0.0450909	-26.6188	62.6103	9.46271	11.8571	3.84402	9.41761
Diplura	BF2	Litter | Soil	-32.2495	-0.670909	-25.2285	42.7118	9.51467	10.8173	7.02098	10.1856
Diplura	BF3	Litter	-32.1422	-0.687409	-26.5266	52.4858	9.51635	12.7726	5.61555	10.2038
Diplura	BJ5	Litter | Soil	-30.9594	-2.12591	-25.2047	46.9024	9.73067	12.8468	5.75464	11.8566
Diplura	BF2	Litter | Soil	-32.2495	-0.670909	-25.0517	47.9118	9.93967	12.5899	7.19776	10.6106
Diplura	HO1	Litter | Soil	-28.4487	1.97209	-26.4859	54.8494	10.1917	11.7719	1.96279	8.21961
Diplura	BF2	Litter | Soil	-32.2495	-0.670909	-25.5313	52.4729	10.2967	11.9717	6.71818	10.9676
Diplura	BF3	Soil	-32.1422	-0.687409	-25.4088	47.3117	10.3757	12.19	6.73342	11.0631
Diplura	HF4	Litter | Soil	-30.5505	0.553091	-25.63	49.8059	10.8397	11.9292	4.92044	10.2866
Diplura	BJ5	Litter | Soil	-30.9594	-2.12591	-24.7538	38.8291	10.9217	9.7304	6.20556	13.0476
Diplura	BO5	Litter | Soil	-30.912	0.952091	-24.9545	38.82	13.3807	7.44633	5.95755	12.4286
Diplura	HF3	Litter | Soil	-30.8969	0.644091	-26.2747	79.7016		19.1593	4.62218
Diptera	HJ4	Litter	-29.8576	-1.15291	-26.5039	45.9599	-1.46407	7.42399	3.35365	-0.311162
Diptera	HF1	Soil	-30.7821	0.202091	-24.9922	47.0968	-1.19125	11.9918	5.78986	-1.39334
Diptera	HR3	Soil	-30.064	1.53209	-26.8869	47.6392	0.595706	10.5696	3.17718	-0.936385
Diptera	HF2	Litter | Soil	-31.5546	-0.660909	-24.7175	47.7862	0.658706	7.66529	6.83707	1.31961
Diptera	HJ3	Litter | Soil	-29.8546	-0.187909	-25.4126	44.8141	1.63935	10.6706	4.44193	1.82726
Diptera	BJ4	Litter | Soil	-30.343	-1.50791	-24.3678	40.9892	1.64167	9.80475	5.97521	3.14958
Diptera	HJ2	Litter	-30.9372	1.15409	-24.0448	44.2881	1.66267	12.3877	6.89243	0.508576
Diptera	BR1	Litter	-30.5444	-0.679909	-25.1285	47.6494	2.03293	8.22959	5.41598	2.71284
Diptera	HO2	Litter | Soil	-30.4629	0.0450909	-29.0828	81.5671	2.15467	4.49342	1.38008	2.10958
Diptera	BJ4	Litter	-30.343	-1.50791	-25.1786	29.2272	2.40935	5.67285	5.16437	3.91726
Diptera	HF4	Litter | Soil	-30.5505	0.553091	-32.2128	46.8699	2.80867	10.0227	-1.6623	2.25558
Diptera	BR2	Litter	-29.9372	-2.09691	-25.9328	42.402	2.82967	9.45061	4.00438	4.92658
Diptera	HJ1	Soil	-30.3027	0.428091	-25.7748	35.3492	2.94567	7.65538	4.52795	2.51758
Diptera	HJ1	Litter	-30.3027	0.428091	-25.0508	46.8847	3.53667	11.3316	5.25195	3.10858
Diptera	BR4	Soil	-30.062	-0.186909	-26.5782	50.5521	3.88893	5.55469	3.48383	4.07584
Diptera	HJ4	Soil	-29.8576	-1.15291	-26.3758	32.467	3.91567	6.95115	3.48182	5.06858
Diptera	HO4	Litter | Soil	-29.8435	0.147091	-27.9541	34.0345	4.27267	3.22141	1.88936	4.12558
Diptera	HF3	Litter	-30.8969	0.644091	-25.6756	51.1872	4.31735	11.0489	5.22127	3.67326
Diptera	HO1	Litter	-28.4487	1.97209	-26.0688	46.973	4.48093	6.25723	2.37986	2.50884
Diptera	HR2	Litter	-29.6179	-1.35591	-24.8168	44.4171	4.51767	10.7492	4.80113	5.87358
Diptera	HR1	Litter	-29.2332	0.621091	-23.0266	49.5431	4.72535	11.6772	6.20654	4.10426
Diptera	BF2	Litter	-32.2495	-0.670909	-26.0078	44.4925	4.81767	10.9981	6.24168	5.48858
Diptera	BF1	Litter	-32.1422	-0.687409	-28.1468	45.2337	4.84767	10.2917	3.99542	5.53508
Diptera	BR1	Soil	-30.5444	-0.679909	-25.3966	49.6706	5.06235	10.3971	5.14779	5.74226
Diptera	BO2	Litter | Soil	-30.1688	-0.0129091	-27.7	45.7364	5.06667	12.0498	2.46878	5.07958
Diptera	BF4	Litter	-32.0349	-0.703909	-25.7927	47.0651	5.22293	10.6709	6.24228	5.92684
Diptera	BR4	Litter	-30.062	-0.186909	-24.5113	44.4929	5.40593	9.64284	5.55072	5.59284
Diptera	BO4	Litter | Soil	-33.2153	-1.10491	-27.4192	45.2664	5.40893	8.31178	5.79607	6.51384
Diptera	HF1	Litter	-30.7821	0.202091	-25.1796	50.2214	5.56135	12.1345	5.60246	5.35926
Diptera	BR3	Soil	-29.5816	-1.50491	-26.4566	47.073	5.59571	7.95557	3.1251	7.10061
Diptera	BJ2	Litter	-29.6834	-3.09891	-27.1002	46.4934	5.72993	8.60591	2.5832	8.82884
Diptera	BF3	Litter | Soil	-32.1422	-0.687409	-26.0166	50.2608	5.84835	9.40091	6.12555	6.53576
Diptera	BO3	Litter	-28.4809	0.876091	-27.0845	40.9061	6.20093	6.6081	1.39642	5.32484
Diptera	BO5	Soil	-30.912	0.952091	-26.3784	43.813	6.26993	7.72435	4.53361	5.31784
Diptera	BJ3	Litter | Soil	-29.9815	-2.48791	-24.5197	46.7363	6.69593	10.0532	5.46179	9.18384
Diptera	HO4	Soil	-29.8435	0.147091	-25.6236	44.9863	7.11135	11.2328	4.21985	6.96426
Diptera	BF2	Soil	-32.2495	-0.670909	-23.6346	47.4458	7.11635	11.2809	8.61481	7.78726
Diptera	HR3	Litter	-30.064	1.53209	-24.4136	41.7954	7.21635	9.88194	5.6504	5.68426
Diptera	BF4	Soil	-32.0349	-0.703909	-24.6347	50.5271	7.35393	10.2194	7.4002	8.05784
Diptera	HJ2	Soil	-30.9372	1.15409	-24.731	43.1185	8.03093	8.68765	6.20623	6.87684
Diptera	BF1	Soil	-32.1422	-0.687409	-25.0772	48.9143	8.15793	10.6287	7.065	8.84534
Diptera	HR1	Litter | Soil	-29.2332	0.621091	-27.5664	170.192	8.17067	7.70893	1.66682	7.54958
Diptera	BO5	Litter	-30.912	0.952091	-25.6902	48.3202	10.5079	9.78775	5.22187	9.55584
Diptera	BR3	Litter	-29.5816	-1.50491	-22.4136	19.1246	10.6984	4.11933	7.168	12.2033
Diptera	BO2	Litter	-30.1688	-0.0129091	-26.1926	56.1863			3.97623
Diptera	BJ5	Litter	-30.9594	-2.12591	-25.9706	51.4663			4.98876
Diptera	BJ2	Soil	-29.6834	-3.09891	-26.2053	53.9591			3.47807
Diptera	BJ4	Soil	-30.343	-1.50791	-27.1133	50.0778			3.22971
Diptera	BR2	Soil	-29.9372	-2.09691	-25.2059	47.1125		8.10295	4.7313
Diptera	BO2	Soil	-30.1688	-0.0129091	-23.3387	47.3279		7.28018	6.83004
Formicidae	HJ3	Litter	-29.8546	-0.187909	-26.6375	42.3231	1.90905	10.8204	3.21703	2.09696
Formicidae	HJ3	Soil	-29.8546	-0.187909	-26.8141	41.6952	2.00205	9.6814	3.04047	2.18996
Formicidae	HR4	Litter	-29.6384	0.265758	-27.5569		3.25741		2.08147	2.99165
Formicidae	BJ2	Soil	-29.6834	-3.09891	-28.089	25.1118	3.40905	5.95461	1.5944	6.50796
Formicidae	BF4	Litter	-32.0349	-0.703909	-26.8488	37.5787	4.96205	10.1609	5.18615	5.66596
Formicidae	HJ2	Litter	-30.9372	1.15409	-26.2726	48.5786	5.17635	13.0001	4.66456	4.02226
Formicidae	HJ2	Soil	-30.9372	1.15409	-27.9471	40.8045	5.24205	10.0319	2.99012	4.08796
Formicidae	BF2	Soil	-32.2495	-0.670909	-26.7536	44.2113	5.24535	11.746	5.49581	5.91626
Formicidae	BO2	Litter | Soil	-30.1688	-0.0129091	-27.4321	18.3698	5.31405	4.06969	2.73669	5.32696
Formicidae	BF1	Litter	-32.1422	-0.687409	-25.9998	49.4666	5.44367	13.327	6.14242	6.13108
Formicidae	BF4	Soil	-32.0349	-0.703909	-26.3932	45.519	5.64475	12.3199	5.64169	6.34866
Formicidae	BJ5	Litter	-30.9594	-2.12591	-27.7159	13.4873	5.73505	2.30241	3.2435	7.86096
Formicidae	BF1	Soil	-32.1422	-0.687409	-25.9246	44.2088	5.77835	11.9792	6.21755	6.46576
Formicidae	HR4	Soil	-29.6384	0.265758	-27.4645		5.83241		2.17386	5.56665
Formicidae	HF1	Soil	-30.7821	0.202091	-25.9336	49.0686	5.84735	12.9328	4.84846	5.64526
Formicidae	BJ4	Litter | Soil	-30.343	-1.50791	-27.1336	43.8374	5.89135	11.8079	3.20937	7.39926
Formicidae	BR2	Litter | Soil	-29.9372	-2.09691	-25.5119	18.5605	5.92805	3.93641	4.42524	8.02496
Formicidae	HF1	Litter	-30.7821	0.202091	-25.4058	47.886	6.00967	13.3015	5.37633	5.80758
Formicidae	HR2	Litter	-29.6179	-1.35591	-25.5868	47.9531	6.07667	12.315	4.03113	7.43258
Formicidae	HO1	Litter	-28.4487	1.97209	-24.7762	41.2305	6.12905	11.3711	3.67244	4.15696
Formicidae	HF3	Litter	-30.8969	0.644091	-25.9196	49.3031	6.30135	13.0645	4.97727	5.65726
Formicidae	BO3	Soil	-28.4809	0.876091	-28.8205	29.8328	6.34705	7.87145	-0.339578	5.47096
Formicidae	HF2	Litter | Soil	-31.5546	-0.660909	-27.451	43.7396	6.42241	8.21688	4.10353	7.08332
Formicidae	BF3	Soil	-32.1422	-0.687409	-25.6216	43.3095	6.53335	11.0321	6.52055	7.22076
Formicidae	HO4	Soil	-29.8435	0.147091	-26.008	40.7703	6.55305	9.54936	3.8355	6.40596
Formicidae	HO4	Litter	-29.8435	0.147091	-28.1226	39.2485	6.75241	8.21024	1.72088	6.60532
Formicidae	HR2	Soil	-29.6179	-1.35591	-26.7351		6.97193	14.3584	2.8828	8.32784
Formicidae	BF2	Litter	-32.2495	-0.670909	-26.5843	46.5752	7.06575	12.9463	5.66521	7.73666
Formicidae	BR4	Soil	-30.062	-0.186909	-27.1822	38.9142	7.10041	7.17103	2.87985	7.28732
Formicidae	HF4	Litter	-30.5505	0.553091	-27.5416	49.6167	7.21135	13.301	3.00883	6.65826
Formicidae	HJ1	Litter | Soil	-30.3027	0.428091	-25.1872	46.25	7.21805	12.055	5.11557	6.78996
Formicidae	HF4	Soil	-30.5505	0.553091	-27.5116	49.3171	7.27735	12.9847	3.03883	6.72426
Formicidae	HR1	Litter	-29.2332	0.621091	-22.0431	40.1795	7.52241	8.8893	7.19014	6.90132
Formicidae	HF3	Soil	-30.8969	0.644091	-26.2048	46.5043	7.61167	12.626	4.69214	6.96758
Formicidae	HR1	Soil	-29.2332	0.621091	-22.2465	44.819	7.67505	11.4958	6.98673	7.05396
Formicidae	HO1	Soil	-28.4487	1.97209	-24.2381	43.4734	7.72005	10.8381	4.21056	5.74796
Formicidae	BJ3	Litter | Soil	-29.9815	-2.48791	-26.2016	43.1863	7.77935	11.1173	3.77982	10.2673
Formicidae	BF3	Litter	-32.1422	-0.687409	-26.4966	44.8578	8.08035	11.6595	5.64555	8.76776
Formicidae	BO5	Soil	-30.912	0.952091	-26.9296	43.791	8.66035	11.9528	3.98238	7.70826
Formicidae	HR3	Litter	-30.064	1.53209	-25.7205		9.07093	23.455	4.34356	7.53884
Formicidae	HR3	Soil	-30.064	1.53209	-25.1305		10.2349	15.9147	4.93351	8.70284
Hemiptera	BJ3	Litter | Soil	-29.9815	-2.48791	-24.7858		-2.39106		5.1957	0.0968466
Hemiptera	BO2	Litter	-30.1688	-0.0129091	-26.1186	57.8628	-1.83565	0.846599	4.05014	-1.82274
Hemiptera	HF2	Litter | Soil	-31.5546	-0.660909	-25.7167		-0.521		5.83785	0.139909
Hemiptera	BO2	Soil	-30.1688	-0.0129091	-26.5683		-0.286		3.60053	-0.273091
Hemiptera	HO1	Soil	-28.4487	1.97209	-26.5189		0.331		1.92976	-1.64109
Hemiptera	HJ1	Litter | Soil	-30.3027	0.428091	-28.2027	52.7791	0.461928	10.7441	2.10004	0.0338373
Hemiptera	BF4	Litter	-32.0349	-0.703909	-25.7516		0.557937		6.28332	1.26185
Hemiptera	HO3	Soil	-29.6632	1.07709	-26.3276		0.642353	1.25345	3.33558	-0.434738
Hemiptera	HR1	Litter | Soil	-29.2332	0.621091	-26.3661	45.7482	1.04367	9.76413	2.86709	0.422576
Hemiptera	BR1	Litter | Soil	-30.5444	-0.679909	-26.1483		1.374		4.39618	2.05391
Hemiptera	BJ2	Litter | Soil	-29.6834	-3.09891	-27.0517	42.6075	1.56667	6.51241	2.63162	4.66558
Hemiptera	BF3	Litter	-32.1422	-0.687409	-24.3571		1.65794		7.78513	2.34535
Hemiptera	HR1	Litter	-29.2332	0.621091			1.758			1.13691
Hemiptera	BR2	Litter | Soil	-29.9372	-2.09691	-26.5917	52.1815	1.76326	10.8454	3.34547	3.86017
Hemiptera	BO5	Soil	-30.912	0.952091	-26.1556		2.176		4.75642	1.22391
Hemiptera	HO1	Litter	-28.4487	1.97209	-27.1804		2.346		1.26826	0.373909
Hemiptera	HF2	Litter | Soil	-31.5546	-0.660909	-27.4865	52.2716	2.48162	9.60651	4.06808	3.14253
Hemiptera	HF1	Litter | Soil	-30.7821	0.202091	-25.9729		3.17		4.80921	2.96791
Hemiptera	BR2	Litter | Soil	-29.9372	-2.09691	-24.7145	62.614	3.26914	12.4754	5.2227	5.36605
Hemiptera	BJ5	Litter | Soil	-30.2418	-2.30516	-27.2384	49.7654	3.41367	11.5602	3.00338	5.71883
Hemiptera	HF2	Litter | Soil	-31.5546	-0.660909	-24.8693	49.1054	3.41963	11.8399	6.68524	4.08054
Hemiptera	BO5	Litter	-30.912	0.952091	-26.4234		3.579		4.48867	2.62691
Hemiptera	BF1	Litter | Soil	-32.1422	-0.687409	-25.9954		3.61894		6.14679	4.30635
Hemiptera	HJ2	Litter | Soil	-30.9372	1.15409	-27.2193		4.095		3.71795	2.94091
Hemiptera	BJ2	Litter | Soil	-29.6834	-3.09891	-26.4778		5.05094		3.20554	8.14985
Hemiptera	BJ5	Litter | Soil	-30.2418	-2.30516	-26.4542	47.6974	5.08567	9.80765	3.78765	7.39083
Hemiptera	BF4	Litter | Soil	-32.0349	-0.703909	-26.1574	53.4759	5.29607	7.95477	5.87753	5.99997
Hemiptera	HR1	Litter | Soil	-29.2332	0.621091	-24.7965	41.6278	5.45667	6.86511	4.4367	4.83558
Hemiptera	BF4	Soil	-32.0349	-0.703909	-25.6948		5.56994		6.34014	6.27385
Hemiptera	BR3	Litter | Soil	-29.5816	-1.50491	-24.4962	47.5272	5.70206	11.1697	5.08548	7.20697
Hemiptera	HR2	Litter | Soil	-29.6179	-1.35591	-24.9014	56.117	6.09456	13.3363	4.71655	7.45047
Hemiptera	HO3	Litter	-29.6632	1.07709	-26.2886			0.477702	3.37458
Isopoda	HJ4	Litter	-29.8576	-1.15291	-26.2977		0.513818		3.55989	1.66673
Isopoda	HJ1	Litter	-30.3027	0.428091	-25.3643		2.65482		4.93845	2.22673
Isopoda	BF2	Litter	-32.2495	-0.670909	-26.6883		2.79382		5.56111	3.46473
Isopoda	BO2	Soil	-30.1688	-0.0129091	-27.153		4.84082		3.01579	4.85373
Isopoda	BF3	Litter	-32.1422	-0.687409	-27.8633		4.92382		4.27885	5.61123
Isopoda	HJ2	Litter	-30.9372	1.15409	-27.0985		5.70482		3.83869	4.55073
Isopoda	BJ2	Litter	-29.6834	-3.09891	-27.9692		6.15682		1.71413	9.25573
Isopoda	BF4	Litter | Soil	-32.0349	-0.703909	-28.2931		6.35482		3.74189	7.05873
Isopoda	BJ5	Litter	-30.2418	-2.30516	-27.9096		6.46682		2.3322	8.77198
Isopoda	HF1	Soil	-30.7821	0.202091	-27.5827		6.71082		3.19941	6.50873
Isopoda	HO2	Soil	-30.4629	0.0450909	-27.2137		7.16682		3.24921	7.12173
Isopoda	BO3	Litter	-28.4809	0.876091	-28.3959		7.25582		0.0850369	6.37973
Isopoda	BJ2	Soil	-29.6834	-3.09891	-27.0738		8.73582		2.60952	11.8347
Isopoda	HO4	Soil	-29.8435	0.147091	-27.7986		9.01382		2.04491	8.86673
Isopoda	BO2	Litter	-30.1688	-0.0129091	-28.4462		9.06182		1.72256	9.07473
Isopoda	BF1	Litter	-32.1422	-0.687409	-27.7256		10.6748		4.4166	11.3622
Isopoda	BF2	Soil	-32.2495	-0.670909	-27.3082		11.9928		4.94123	12.6637
Isopoda	BJ4	Soil	-30.343	-1.50791	-27.5149		12.8788		2.82816	14.3867
Isopoda	BJ3	Litter | Soil	-29.9815	-2.48791	-28.3095		12.9428		1.67197	15.4307
Isoptera	BO5	Litter	-30.6942	0.177591	-27.483		0.243929	24.313	3.21124	0.0663377
Isoptera	BO3	Litter	-28.4809	0.876091	-27.5301		0.610929	12.5887	0.950821	-0.265162
Isoptera	BF2	Litter	-32.2495	-0.670909	-28.0904		0.630412		4.15902	1.30132
Isoptera	BO4	Litter	-33.2153	-1.10491	-27.233		0.634929	16.7147	5.98226	1.73984
Isoptera	HJ2	Soil	-30.9372	1.15409	-27.7654		0.693929	19.046	3.17179	-0.460162
Isoptera	HO1	Litter	-28.4487	1.97209	-27.3669		0.723929	11.3346	1.08177	-1.24816
Isoptera	HR1	Litter	-29.2332	0.621091	-27.392		0.783929		1.8412	0.162838
Isoptera	BO3	Soil	-28.4809	0.876091	-26.6954		1.31293	9.00332	1.78553	0.436838
Isoptera	BO2	Litter	-30.1688	-0.0129091	-27.3502		1.40693	16.0897	2.81863	1.41984
Isoptera	BJ5	Soil	-30.9594	-2.12591	-27.8428		1.41993	24.2429	3.11654	3.54584
Isoptera	BR3	Litter	-29.5816	-1.50491	-27.2456		1.59493	21.3335	2.33609	3.09984
Isoptera	HF1	Litter	-30.7821	0.202091	-26.8931		1.66793	12.745	3.88906	1.46584
Isoptera	BF1	Litter	-32.1422	-0.687409	-27.9632	50.1897	1.74675	10.3876	4.17895	2.43416
Isoptera	BJ3	Litter	-29.9815	-2.48791	-27.9349		1.79593		2.0466	4.28384
Isoptera	HF2	Litter	-31.5546	-0.660909	-28.1409		1.94693	15.0122	3.41363	2.60784
Isoptera	HF4	Litter	-30.5505	0.553091	-28.4641		2.33693	12.7869	2.08633	1.78384
Isoptera	BJ5	Litter	-30.9594	-2.12591	-27.6001		2.67893		3.35921	4.80484
Isoptera	HJ2	Litter	-30.9372	1.15409	-27.8052		2.73693	11.3078	3.13204	1.58284
Isoptera	HJ3	Litter	-29.8546	-0.187909	-27.8596		3.33493		1.99502	3.52284
Isoptera	HJ4	Litter | Soil	-29.8576	-1.15291	-28.0376	15.2974	5.50035	2.50643	1.81995	6.65326
Isoptera	BF3	Litter | Soil	-32.1422	-0.687409	-27.5652		6.49341		4.57699	7.18082
Isoptera	HR3	Litter	-30.064	1.53209	-26.619		8.38993	17.3048	3.44505	6.85784
Isoptera	BF2	Soil	-32.2495	-0.670909	-27.8766		8.78241		4.37284	9.45332
Lepidoptera	BJ4	Litter | Soil	-30.343	-1.50791	-28.1834	10.1242	-2.13364	12.0795	2.15961	-0.625732
Lepidoptera	BJ4	Litter | Soil	-30.343	-1.50791	-27.1703	43.6075	0.324667	6.27171	3.17268	1.83258
Lepidoptera	BO4	Litter | Soil	-33.2153	-1.10491	-32.2831	53.9288	0.355443	12.4245	0.932143	1.46035
Lepidoptera	BJ3	Litter	-29.9815	-2.48791	-27.9768		0.873706	2.90216	2.00467	3.36161
Lepidoptera	HF1	Litter	-30.7821	0.202091	-27.3724	63.9637	1.63994	3.55267	3.40971	1.43785
Lepidoptera	BO4	Litter | Soil	-33.2153	-1.10491	-26.0838	47.0961	1.68567	12.1482	7.13145	2.79058
Lepidoptera	HF2	Litter	-31.5546	-0.660909	-27.7077	66.9182	1.73171	3.41943	3.84684	2.39261
Lepidoptera	BR1	Litter	-30.5444	-0.679909	-26.7769	53.1467	1.89371	9.94724	3.7675	2.57361
Lepidoptera	HJ2	Litter	-30.9372	1.15409	-27.7894	62.1991	2.45871	4.828	3.14782	1.30461
Lepidoptera	BO4	Litter | Soil	-33.2153	-1.10491	-27.5507	58.2844	2.64767	4.14333	5.66461	3.75258
Lepidoptera	HR2	Litter | Soil	-29.6179	-1.35591	-25.2763	62.2114	2.75447	11.0649	4.34156	4.11038
Lepidoptera	BF4	Litter	-32.0349	-0.703909	-27.6596	63.7703	2.92871	7.72876	4.37539	3.63261
Lepidoptera	HR2	Litter | Soil	-29.6179	-1.35591	-24.1686	48.3668	3.25367	10.1776	5.44932	4.60958
Lepidoptera	BR2	Litter	-29.9372	-2.09691	-27.6774		3.44971	8.18429	2.2598	5.54661
Lepidoptera	BR3	Litter	-29.5816	-1.50491	-27.5067		4.06894	1.25197	2.07496	5.57385
Lepidoptera	HJ4	Litter	-29.8576	-1.15291	-27.5727	68.6544	4.32371	3.6285	2.28494	5.47661
Lepidoptera	HR2	Litter | Soil	-29.6179	-1.35591	-25.7355	51.6408	4.40767	9.63479	3.88245	5.76358
Lepidoptera	HJ1	Litter	-30.3027	0.428091	-26.4778	61.7112	4.47694	7.91929	3.82491	4.04885
Lepidoptera	BJ2	Litter | Soil	-29.6834	-3.09891	-27.869	58.3835	4.49371	7.09367	1.81441	7.59261
Lepidoptera	BF2	Litter	-32.2495	-0.670909	-28.0417	68.8285	4.72271	5.39487	4.20775	5.39361
Lepidoptera	BF1	Litter	-32.1422	-0.687409	-26.7036	49.5319	4.73171	10.5008	5.43855	5.41911
Lepidoptera	HR4	Litter | Soil	-29.6384	0.265758	-22.8665	43.693	5.14967	11.2915	6.77187	4.88391
Lepidoptera	BO5	Litter	-30.6942	0.177591	-28.159	57.474	5.25471	7.02483	2.53527	5.07711
Lepidoptera	BO2	Litter | Soil	-30.1688	-0.0129091	-27.3287	69.1979	5.47671	3.10536	2.84008	5.48961
Lepidoptera	HJ3	Litter	-29.8546	-0.187909	-27.8103		5.75471	1.08775	2.04425	5.94261
Lepidoptera	BR4	Litter	-30.062	-0.186909	-26.4902	62.9043	6.95094	5.32232	3.57182	7.13785
Lepidoptera	HR3	Litter | Soil	-30.064	1.53209	-26.4887	51.4048	7.34587	7.15058	3.57539	5.81378
Lepidoptera	HR3	Litter | Soil	-30.064	1.53209	-22.74	41.2711	8.74167	9.35279	7.32404	7.20958
Lepidoptera	BO3	Litter	-28.4809	0.876091	-27.9653		8.86771	1.81292	0.515608	7.99161
Litter	BJ2	Litter	-29.6834	-3.09891	-30.0933	45.4669	-3.72491	1.21811	-0.40989	-0.626
Litter	BJ2	Litter	-29.6834	-3.09891	-29.6834	46.7611	-3.09891	2.11538	0	0
Litter	HR1	Litter	-29.2332	0.621091	-29.1083	19.3059	-2.89391	0.599094	0.12488	-3.515
Litter	BR1	Litter	-30.5444	-0.679909	-29.7247	50.4779	-2.86691	1.59214	0.819779	-2.187
Litter	BJ3	Litter	-29.9815	-2.48791	-29.9815	35.6305	-2.48791	1.05057	0	0
Litter	HR2	Litter	-29.6179	-1.35591	-29.4769	36.4103	-2.25591	1.323	0.140994	-0.9
Litter	BJ3	Litter	-29.9815	-2.48791	-32.463	47.6117	-2.24891	1.98014	-2.48149	0.239
Litter	BR1	Litter	-30.5444	-0.679909	-29.0167	49.3573	-2.19991	1.65312	1.52777	-1.52
Litter	BJ5	Litter	-30.9594	-2.12591	-30.9594	47.2116	-2.12591	1.47965	0	0
Litter	BR2	Litter	-29.9372	-2.09691	-29.7629	41.5036	-2.10591	1.34698	0.174228	-0.009
Litter	BR2	Litter	-29.9372	-2.09691	-29.9372	30.9406	-2.09691	1.00956	0	0
Litter	BJ4	Litter	-30.343	-1.50791	-31.0973	50.535	-2.04291	1.22953	-0.754318	-0.535
Litter	BR2	Litter	-29.9372	-2.09691	-29.4386	42.9418	-1.84991	1.59461	0.498515	0.247
Litter	BJ3	Litter	-29.9815	-2.48791	-30.625	44.83	-1.76291	1.41564	-0.643537	0.725
Litter	BR3	Litter	-29.5816	-1.50491	-30.4216	36.4308	-1.74591	1.24671	-0.839921	-0.241
Litter	BJ4	Litter	-30.343	-1.50791	-30.343	41.3944	-1.50791	1.48158	0	0
Litter	BR3	Litter	-29.5816	-1.50491	-29.5816	49.2112	-1.50491	1.39124	0	0
Litter	HJ4	Litter	-29.8576	-1.15291	-30.9725	38.4463	-1.45391	1.4333	-1.11486	-0.301
Litter	BJ4	Litter	-30.343	-1.50791	-32.7621	42.2947	-1.40991	1.5528	-2.41905	0.098
Litter	BR3	Litter	-29.5816	-1.50491	-30.0389	23.983	-1.38791	0.758834	-0.457223	0.117
Litter	BJ2	Litter	-29.6834	-3.09891	-29.8727	34.3927	-1.37091	1.49527	-0.189335	1.728
Litter	HR2	Litter	-29.6179	-1.35591	-29.6179	35.4374	-1.35591	1.3409	0	0
Litter	BR4	Litter	-30.062	-0.186909	-28.7327	39.6024	-1.22791	1.23912	1.32937	-1.041
Litter	HJ4	Litter	-29.8576	-1.15291	-29.8576	36.7313	-1.15291	1.31362	0	0
Litter	BO4	Litter	-33.2153	-1.10491	-33.2153	32.7273	-1.10491	1.08618	0	0
Litter	HO4	Litter	-29.8435	0.147091	-30.9785	34.08	-1.00191	1.53291	-1.135	-1.149
Litter	BF4	Litter	-32.0349	-0.703909	-30.2272	32.5712	-0.886909	1.08442	1.80774	-0.183
Litter	HJ3	Litter	-29.8546	-0.187909	-29.6038	40.6061	-0.776909	1.41644	0.250768	-0.589
Litter	BF4	Litter	-32.0349	-0.703909	-32.0349	52.1563	-0.703909	1.47551	0	0
Litter	BR1	Litter	-30.5444	-0.679909	-30.5444	36.3373	-0.679909	1.42046	0	0
Litter	BF2	Litter	-32.2495	-0.670909	-32.2495	44.1612	-0.670909	1.78945	0	0
Litter	HF2	Litter	-31.5546	-0.660909	-31.5546	44.5323	-0.660909	1.28657	0	0
Litter	BR4	Litter	-30.062	-0.186909	-29.8898	43.483	-0.580909	1.59863	0.172214	-0.394
Litter	BO2	Litter	-30.1688	-0.0129091	-30.6683	30.0441	-0.507909	1.23283	-0.499522	-0.495
Litter	HJ3	Litter	-29.8546	-0.187909	-29.6521	37.1391	-0.446909	1.50318	0.202427	-0.259
Litter	HF4	Litter	-30.5505	0.553091	-30.4226	29.1924	-0.427909	0.888168	0.127902	-0.981
Litter	BF4	Litter	-32.0349	-0.703909	-31.618	36.1895	-0.405909	1.18438	0.416939	0.298
Litter	BJ5	Litter	-30.9594	-2.12591	-33.9484	44.2516	-0.396909	1.69724	-2.98907	1.729
Litter	HO2	Litter	-30.4629	0.0450909	-28.9472	25.4824	-0.336909	0.984951	1.51569	-0.382
Litter	HJ4	Litter	-29.8576	-1.15291	-29.9543	79.23	-0.288909	2.49218	-0.0966816	0.864
Litter	HR2	Litter	-29.6179	-1.35591	-28.7981	31.0394	-0.258909	0.710949	0.819779	1.097
Litter	HJ2	Litter	-30.9372	1.15409	-30.7861	25.5377	-0.231909	1.25508	0.151065	-1.386
Litter	BF2	Litter	-32.2495	-0.670909	-29.8183	47.6693	-0.222909	1.88007	2.43114	0.448
Litter	HJ3	Litter	-29.8546	-0.187909	-29.8546	32.9668	-0.187909	1.6509	0	0
Litter	BR4	Litter	-30.062	-0.186909	-30.062	41.4366	-0.186909	1.32426	0	0
Litter	BO4	Litter	-33.2153	-1.10491	-30.06	43.7268	-0.177909	1.03596	3.15524	0.927
Litter	HJ1	Litter	-30.3027	0.428091	-29.9301	39.904	-0.110909	1.56631	0.372627	-0.539
Litter	HJ1	Litter	-30.3027	0.428091			-0.0909091	0.0261091		-0.519
Litter	BO2	Litter	-30.1688	-0.0129091	-30.1688	31.5246	-0.0129091	1.34918	0	0
Litter	HF3	Litter	-30.8969	0.644091	-31.048	27.7468	-0.0119091	1.21988	-0.151065	-0.656
Litter	BF1	Litter	-32.1422	-0.687409	-28.1687	45.9794	-0.00990909	1.73808	3.97351	0.6775
Litter	HO2	Litter	-30.4629	0.0450909	-30.4629	19.3603	0.0450909	0.786538	0	0
Litter	HR4	Litter	-29.6384	0.265758	-28.1244	71.836	0.0630909	2.28662	1.51401	-0.202667
Litter	HF1	Litter	-30.7821	0.202091	-30.6975	25.3244	0.0660909	0.96162	0.0845964	-0.136
Litter	HO4	Litter	-29.8435	0.147091	-29.8435	27.1146	0.147091	0.997209	0	0
Litter	HO4	Litter	-29.8435	0.147091	-29.9795	23.2548	0.182091	1.07697	-0.135958	0.035
Litter	HF1	Litter	-30.7821	0.202091	-30.7821	31.278	0.202091	1.13927	0	0
Litter	HF3	Litter	-30.8969	0.644091	-31.1991	33.0661	0.238091	1.06055	-0.30213	-0.406
Litter	HF1	Litter	-30.7821	0.202091	-30.9483	23.2884	0.337091	1.01845	-0.166171	0.135
Litter	HF2	Litter	-31.5546	-0.660909	-31.6613	27.7123	0.343091	1.07018	-0.106753	1.004
Litter	BF3	Litter	-32.1422	-0.687409	-30.2453	53.1378	0.370091	1.38232	1.89687	1.0575
Litter	HF2	Litter	-31.5546	-0.660909	-30.4548	31.1094	0.414091	1.27531	1.09975	1.075
Litter	HJ1	Litter	-30.3027	0.428091	-30.3027	33.246	0.428091	1.5216	0	0
Litter	BO3	Litter	-28.4809	0.876091	-31.7711	21.6266	0.474091	1.06615	-3.2902	-0.402
Litter	HO1	Litter	-28.4487	1.97209	-30.1325	28.9143	0.475091	0.979205	-1.68387	-1.497
Litter	HF4	Litter	-30.5505	0.553091	-30.5505	32.6492	0.553091	1.07893	0	0
Litter	HR1	Litter	-29.2332	0.621091	-29.2332	15.9664	0.621091	0.726372	0	0
Litter	HF4	Litter	-30.5505	0.553091	-31.3129	42.0635	0.625091	1.65877	-0.762375	0.072
Litter	HF3	Litter	-30.8969	0.644091	-30.8969	39.3293	0.644091	1.41516	0	0
Litter	BF3	Litter	-32.1422	-0.687409	-33.1045	46.0997	0.680091	1.71041	-0.962284	1.3675
Litter	HO3	Litter	-29.6632	1.07709	-25.9339	12.4655	0.681091	0.65522	3.72929	-0.396
Litter	BO4	Litter	-33.2153	-1.10491	-33.1478	36.4374	0.701091	1.53068	0.0674757	1.806
Litter	BO3	Litter	-28.4809	0.876091	-28.4809	35.6479	0.876091	1.06589	0	0
Litter	BF1	Litter	-32.1422	-0.687409	-29.2664	34.8415	0.947091	1.6225	2.87577	1.6345
Litter	BF2	Litter	-32.2495	-0.670909	-33.3583	45.0913	0.949091	1.64561	-1.10882	1.62
Litter	BO5	Litter	-30.912	0.952091	-30.912	39.62	0.952091	1.79523	0	0
Litter	HR1	Litter	-29.2332	0.621091	-28.067	12.2347	1.05709	0.50064	1.16622	0.436
Litter	HO3	Litter	-29.6632	1.07709	-29.6632	32.1846	1.07709	1.28799	0	0
Litter	HJ2	Litter	-30.9372	1.15409	-30.6885	32.1957	1.09809	1.51233	0.248754	-0.056
Litter	HJ2	Litter	-30.9372	1.15409	-30.9372	23.0844	1.15409	0.993205	0	0
Litter	BO3	Litter	-28.4809	0.876091	-30.4608	37.3347	1.17709	2.08221	-1.97996	0.301
Litter	HO3	Litter	-29.6632	1.07709	-30.9221	26.2546	1.24709	1.36803	-1.25887	0.17
Litter	BO5	Litter	-30.912	0.952091	-29.9734	16.8788	1.30309	0.747278	0.938617	0.351
Litter	BO2	Litter	-30.1688	-0.0129091	-27.929	35.2167	1.39709	1.3435	2.23979	1.41
Litter	HR3	Litter	-30.064	1.53209	-30.064	23.0726	1.53209	0.85018	0	0
Litter	BO5	Litter	-30.912	0.952091	-28.7971	38.3342	1.56409	1.78788	2.11491	0.612
Litter	HR3	Litter	-30.064	1.53209	-28.8716	19.3507	1.58109	0.732723	1.19241	0.049
Litter	HO2	Litter	-30.4629	0.0450909	-27.4718	24.8235	1.88609	1.18723	2.99109	1.841
Litter	HO1	Litter	-28.4487	1.97209	-28.4487	24.513	1.97209	0.798161	0	0
Litter	HR4	Litter	-29.6384	0.265758	-29.5293	25.0422	2.07309	0.973397	0.109102	1.80733
Litter	HO1	Litter	-28.4487	1.97209	-30.1748	21.6606	2.44809	0.83008	-1.72617	0.476
Litter	HR3	Litter	-30.064	1.53209	-28.8263	18.6452	2.64709	0.990472	1.23773	1.115
Mesostigmata	HR3	Litter | Soil	-30.064	1.53209	-25.3377		4.07593	21.4854	4.7264	2.54384
Mesostigmata	HJ4	Litter	-29.8576	-1.15291	-25.3377	35.8863	4.95993	8.76422	4.51994	6.11284
Mesostigmata	HF2	Litter	-31.5546	-0.660909	-26.0926	19.358	5.551	3.63	5.46195	6.21191
Mesostigmata	HF1	Litter	-30.7821	0.202091	-26.255	29.7134	5.60993	6.77789	4.52712	5.40784
Mesostigmata	BF4	Soil	-32.0349	-0.703909	-26.6818	26.6971	5.73993	5.78667	5.35318	6.44384
Mesostigmata	HO3	Litter	-29.6632	1.07709	-28.1742	12.4047	5.86867	0.953474	1.48898	4.79158
Mesostigmata	HJ4	Soil	-29.8576	-1.15291	-27.7048	16.4642	6.14167	2.08175	2.15275	7.29458
Mesostigmata	HO2	Litter	-30.4629	0.0450909	-28.0691	12.5634	6.55667	1.08551	2.39375	6.51158
Mesostigmata	HJ3	Litter	-29.8546	-0.187909	-27.913	17.2294	6.57367	2.21062	1.94158	6.76158
Mesostigmata	HR4	Litter	-29.6384	0.265758	-26.7713	23.6687	6.68267	3.7167	2.86704	6.41691
Mesostigmata	BF4	Litter	-32.0349	-0.703909	-27.1195	17.6309	6.73	2.59065	4.91544	7.43391
Mesostigmata	HF3	Litter	-30.8969	0.644091	-26.6736	21.343	6.79867	4.46252	4.22328	6.15458
Mesostigmata	BF3	Litter	-32.1422	-0.687409	-28.6032	15.9709	7.135	1.49853	3.53905	7.82241
Mesostigmata	BJ4	Litter	-30.343	-1.50791	-28.3491	11.6272	7.237	0.73014	1.99396	8.74491
Mesostigmata	HO1	Soil	-28.4487	1.97209	-24.9808	25.7248	7.24067	5.99336	3.46785	5.26858
Mesostigmata	HJ1	Litter	-30.3027	0.428091	-25.4674	18.6904	7.27393	3.8966	4.83538	6.84584
Mesostigmata	HJ2	Litter	-30.9372	1.15409	-27.4489	22.2188	7.28167	3.98365	3.4883	6.12758
Mesostigmata	BO3	Soil	-28.4809	0.876091	-28.6567	12.5257	7.409	0.922597	-0.175815	6.53291
Mesostigmata	HJ2	Soil	-30.9372	1.15409	-27.5509	16.9376	7.69867	2.84864	3.38635	6.54458
Mesostigmata	BF1	Litter	-32.1422	-0.687409	-26.6407	17.9652	7.912	3.02372	5.5015	8.59941
Mesostigmata	BO5	Litter	-30.912	0.952091	-26.141	33.6584	8.02293	7.57057	4.77105	7.07084
Mesostigmata	HR1	Soil	-29.2332	0.621091	-27.6422	18.5575	8.16567	2.82323	1.59101	7.54458
Mesostigmata	HJ1	Soil	-30.3027	0.428091	-26.7533	17.9053	8.29167	2.94671	3.54944	7.86358
Mesostigmata	HR3	Litter	-30.064	1.53209	-25.7072	22.9799	8.59567	4.48827	4.35683	7.06358
Mesostigmata	BO5	Soil	-30.912	0.952091	-26.562	16.5958	8.66	2.61395	4.35007	7.70791
Mesostigmata	HR2	Litter	-29.6179	-1.35591	-27.4935	19.9379	8.70867	3.24921	2.1244	10.0646
Mesostigmata	BF3	Soil	-32.1422	-0.687409	-27.6865	14.5439	9.269	1.451	4.4557	9.95641
Mesostigmata	HF2	Soil	-31.5546	-0.660909	-26.0527	19.4028	9.819	4.07694	5.50185	10.4799
Mesostigmata	HO2	Soil	-30.4629	0.0450909	-27.8748	12.1266	10.2907	1.33728	2.5881	10.2456
Mesostigmata	HO3	Soil	-29.6632	1.07709	-27.6273	12.8114	10.3237	1.39088	2.03591	9.24658
Mesostigmata	HR2	Soil	-29.6179	-1.35591	-28.632	18.7641	10.5857	2.65525	0.985935	11.9416
Oribatida	BF2	Litter | Soil	-31.8087	0.0184242	-26.4947		-9.52418	3.59575	5.31396	-9.54261
Oribatida	BF3	Litter | Soil	-31.6749	0.525091	-25.5298		-8.61547		6.14514	-9.14057
Oribatida	BF2	Litter | Soil	-31.8087	0.0184242	-28.8091	54.6218	-7.93283	2.4468	2.99957	-7.95125
Oribatida	HR2	Litter | Soil	-29.2976	-1.29024	-31.1784	34.6673	-6.89929	3.87423	-1.88073	-5.60904
Oribatida	BF3	Litter | Soil	-31.6749	0.525091	-28.3731		-6.86108	10.9342	3.30182	-7.38618
Oribatida	BR3	Litter | Soil	-30.014	-1.54624	-36.3768		-5.51429		-6.36275	-3.96804
Oribatida	BJ2	Litter | Soil	-29.8831	-2.73158	-24.678	38.3916	-5.47526	4.08177	5.2051	-2.74369
Oribatida	BR1	Litter | Soil	-29.7619	-1.91558	-26.082		-5.42671		3.67988	-3.51113
Oribatida	HR1	Litter | Soil	-28.8028	-0.405242	-27.9246	21.4459	-5.27367	1.8274	0.878186	-4.86842
Oribatida	BJ3	Litter | Soil	-31.0231	-2.16658	-28.1838	30.3204	-5.26921	3.92539	2.83937	-3.10264
Oribatida	HF4	Litter | Soil	-30.762	0.250091	-27.501	61.342	-4.63326	11.982	3.26098	-4.88335
Oribatida	BF1	Litter | Soil	-28.7176	0.468591	-26.1898		-4.48014	10.9862	2.52775	-4.94873
Oribatida	HR3	Litter | Soil	-29.254	1.92009	-27.6713		-3.98082	11.1855	1.58266	-5.90091
Oribatida	HF2	Litter | Soil	-31.2236	0.0320909	-28.5692	40.2824	-3.89115	6.08249	2.65434	-3.92325
Oribatida	HF2	Litter | Soil	-31.2236	0.0320909	-28.3583	46.4361	-3.74126	5.225	2.86524	-3.77335
Oribatida	HF1	Litter | Soil	-30.8093	0.201758	-27.4014	51.4652	-3.64026	11.7614	3.40786	-3.84202
Oribatida	BR1	Litter | Soil	-29.7619	-1.91558	-34.4521	58.0867	-3.62229	10.971	-4.69021	-1.70671
Oribatida	HF2	Litter | Soil	-31.2236	0.0320909	-28.0651	38.4956	-3.34346	8.43971	3.15844	-3.37555
Oribatida	HR2	Litter | Soil	-29.2976	-1.29024	-26.5388		-3.24447	23.8076	2.75881	-1.95423
Oribatida	HJ3	Litter | Soil	-29.7035	-0.470576	-27.1751		-3.18617		2.5284	-2.71559
Oribatida	BR3	Litter | Soil	-30.014	-1.54624	-29.853		-3.17242		0.161045	-1.62618
Oribatida	BJ2	Litter | Soil	-29.8831	-2.73158	-29.1807	42.108	-3.147	6.66576	0.70236	-0.415426
Oribatida	HF4	Litter | Soil	-30.762	0.250091	-28.7336	50.6947	-3.02607	11.1668	2.02842	-3.27616
Oribatida	BF3	Litter | Soil	-31.6749	0.525091	-26.4217	58.6112	-2.92617	3.74664	5.25324	-3.45126
Oribatida	BJ2	Litter | Soil	-29.8831	-2.73158	-29.0516	48.3177	-2.90738	11.1867	0.831496	-0.175801
Oribatida	HF3	Litter | Soil	-31.048	0.290091	-28.1965	54.7059	-2.87708	12.0549	2.85149	-3.16718
Oribatida	HF3	Litter | Soil	-31.048	0.290091	-28.585	36.9307	-2.74714	7.54072	2.46301	-3.03723
Oribatida	BJ3	Litter | Soil	-31.0231	-2.16658	-27.1727	49.838	-2.7454	10.7022	3.85044	-0.578821
Oribatida	HF3	Litter | Soil	-31.048	0.290091	-28.2386	48.9523	-2.70926	10.9023	2.80934	-2.99935
Oribatida	BR1	Litter | Soil	-29.7619	-1.91558	-35.4915	53.3559	-2.66529	9.6275	-5.72955	-0.74971
Oribatida	HR1	Litter | Soil	-28.8028	-0.405242	-31.1306	45.315	-2.64729	7.66874	-2.32776	-2.24204
Oribatida	HF4	Litter | Soil	-30.762	0.250091	-29.0884	83.5764	-2.62119	15.1115	1.67354	-2.87128
Oribatida	HF4	Litter | Soil	-30.762	0.250091	-28.6699	43.3096	-2.61705	8.46918	2.09211	-2.86714
Oribatida	HF1	Litter | Soil	-30.8093	0.201758	-27.6698	34.1511	-2.56915	6.61248	3.13948	-2.7709
Oribatida	HJ2	Litter | Soil	-30.8039	0.673424	-27.8539		-2.53967		2.95006	-3.21309
Oribatida	BR2	Litter | Soil	-29.7129	-2.01758	-29.9229		-2.53887	1.06092	-0.210005	-0.521295
Oribatida	BJ2	Litter | Soil	-29.8831	-2.73158	-26.9014	38.0968	-2.52618	2.67473	2.98174	0.205394
Oribatida	BF3	Litter | Soil	-31.6749	0.525091	-27.536	44.6922	-2.50513	8.85346	4.13893	-3.03022
Oribatida	BJ4	Litter | Soil	-31.4008	-1.65358	-25.8501		-2.46826		5.55074	-0.814687
Oribatida	BJ3	Litter | Soil	-31.0231	-2.16658	-30.3697	16.8144	-2.44255	2.1602	0.653446	-0.275974
Oribatida	HF3	Litter | Soil	-31.048	0.290091	-28.1372	55.8649	-2.30798	10.9864	2.91076	-2.59807
Oribatida	BJ2	Litter | Soil	-29.8831	-2.73158	-25.0526	48.7325	-2.25521	6.54232	4.83055	0.476363
Oribatida	HF1	Litter | Soil	-30.8093	0.201758	-27.4361	45.1894	-2.23019	9.38929	3.37321	-2.43194
Oribatida	BF3	Litter | Soil	-31.6749	0.525091	-27.8875	44.5746	-2.2173	2.58294	3.78743	-2.74239
Oribatida	BF4	Litter | Soil	-31.2934	-0.665576	-26.0585	44.5542	-2.11818	2.31358	5.23489	-1.45261
Oribatida	BJ5	Litter | Soil	-32.4539	-1.26141	-25.6805		-2.11769		6.77343	-0.85628
Oribatida	HJ3	Litter | Soil	-29.7035	-0.470576	-28.9287	47.377	-2.07917	9.33908	0.774765	-1.60859
Oribatida	HF4	Litter | Soil	-30.762	0.250091	-27.8893	38.0086	-2.05646	7.31095	2.87262	-2.30655
Oribatida	HF4	Litter | Soil	-30.762	0.250091	-28.8843	75.5954	-2.0059	9.25001	1.87763	-2.25599
Oribatida	BF4	Litter | Soil	-31.2934	-0.665576	-27.8732	44.2357	-1.9943	9.44844	3.42021	-1.32873
Oribatida	BJ3	Litter | Soil	-31.0231	-2.16658	-26.6417	38.4293	-1.95109	8.53588	4.38149	0.215485
Oribatida	BJ2	Litter | Soil	-29.8831	-2.73158	-26.6418	56.567	-1.93304	10.2918	3.24129	0.798535
Oribatida	BO3	Litter | Soil	-30.2376	0.842424	-25.5646	22.2384	-1.88696	2.47638	4.67302	-2.72939
Oribatida	BF3	Litter | Soil	-31.6749	0.525091	-27.5566	77.6546	-1.88631	15.9362	4.11835	-2.4114
Oribatida	BO3	Litter | Soil	-30.2376	0.842424	-27.8416		-1.82657		2.39601	-2.669
Oribatida	BF4	Litter | Soil	-31.2934	-0.665576	-27.0539	44.9079	-1.81059	9.3287	4.23952	-1.14501
Oribatida	HR3	Litter | Soil	-29.254	1.92009	-27.2505	35.0973	-1.80335	3.56093	2.00351	-3.72344
Oribatida	BF3	Litter | Soil	-31.6749	0.525091	-27.9721	39.8841	-1.76908	7.63341	3.70284	-2.29417
Oribatida	HR3	Litter | Soil	-29.254	1.92009	-28.2295		-1.76156		1.02455	-3.68165
Oribatida	HF1	Litter | Soil	-30.8093	0.201758	-29.9183	31.94	-1.75175	0.764474	0.890955	-1.95351
Oribatida	BF4	Litter | Soil	-31.2934	-0.665576	-27.1432	48.8603	-1.74506	10.613	4.15018	-1.07949
Oribatida	BR4	Litter | Soil	-29.5615	-0.665242	-25.4152	33.5868	-1.74081	5.49332	4.14633	-1.07557
Oribatida	HF3	Litter | Soil	-31.048	0.290091	-29.4168	30.4657	-1.70688	1.13842	1.63118	-1.99697
Oribatida	HJ4	Litter | Soil	-30.2614	-0.965242	-26.5416	46.7251	-1.67167	8.48883	3.71988	-0.706424
Oribatida	HJ4	Litter | Soil	-30.2614	-0.965242	-26.6258	38.1741	-1.65518	2.4224	3.6356	-0.689939
Oribatida	HF3	Litter | Soil	-31.048	0.290091	-28.3318	42.0608	-1.62827	9.00096	2.7162	-1.91836
Oribatida	BJ5	Litter | Soil	-32.4539	-1.26141	-27.8925	41.2911	-1.6189	6.87149	4.56141	-0.35749
Oribatida	BJ2	Litter | Soil	-29.8831	-2.73158	-29.2518	34.275	-1.59757	6.08971	0.631348	1.134
Oribatida	BJ2	Litter | Soil	-29.8831	-2.73158	-30.4381	48.822	-1.59321	9.88892	-0.554943	1.13837
Oribatida	BJ2	Litter | Soil	-29.8831	-2.73158	-28.1159	38.3997	-1.5581	8.18461	1.7672	1.17348
Oribatida	HF2	Litter | Soil	-31.2236	0.0320909	-28.0485	48.8833	-1.54296	9.61532	3.17504	-1.57505
Oribatida	HF1	Litter | Soil	-30.8093	0.201758	-28.4427	35.8658	-1.47292	6.32978	2.36661	-1.67467
Oribatida	BF3	Litter | Soil	-31.6749	0.525091	-27.6421	44.6582	-1.46148	9.78509	4.03277	-1.98657
Oribatida	BR1	Litter | Soil	-29.7619	-1.91558	-25.4713	17.7326	-1.4557	2.2214	4.29062	0.459871
Oribatida	BJ5	Litter | Soil	-32.4539	-1.26141	-28.8863	22.8891	-1.45069	2.83912	3.56758	-0.189281
Oribatida	BR2	Litter | Soil	-29.7129	-2.01758	-26.7378	48.8326	-1.44818	3.97425	2.97508	0.569394
Oribatida	BJ2	Litter | Soil	-29.8831	-2.73158	-27.3067	42.8665	-1.429	9.54897	2.57642	1.30258
Oribatida	HR1	Litter | Soil	-28.8028	-0.405242	-30.7919	34.5348	-1.42329	5.98882	-1.98906	-1.01804
Oribatida	BJ3	Litter | Soil	-31.0231	-2.16658	-26.1076	40.6924	-1.42298	7.13895	4.91555	0.743591
Oribatida	BJ2	Litter | Soil	-29.8831	-2.73158	-23.8349	32.6984	-1.42043	3.9655	6.04824	1.31115
Oribatida	BF3	Litter | Soil	-31.6749	0.525091	-27.9581	33.0423	-1.40869	1.18012	3.71683	-1.93378
Oribatida	HF4	Litter | Soil	-30.762	0.250091	-28.4128	32.9524	-1.37749	1.93667	2.34922	-1.62758
Oribatida	BF4	Litter | Soil	-31.2934	-0.665576	-28.0907	40.2143	-1.3733	9.06153	3.20272	-0.70772
Oribatida	BF4	Litter | Soil	-31.2934	-0.665576	-27.241	40.8523	-1.34957	9.28393	4.05241	-0.683999
Oribatida	HJ1	Litter | Soil	-30.1164	0.158591	-25.5322	82.1631	-1.30657	10.3595	4.58418	-1.46516
Oribatida	HF4	Litter | Soil	-30.762	0.250091	-28.3058	39.0328	-1.29963	1.94191	2.45619	-1.54972
Oribatida	HJ2	Litter | Soil	-30.8039	0.673424	-29.321	31.5988	-1.29677	0.794449	1.48298	-1.97019
Oribatida	HJ4	Litter | Soil	-30.2614	-0.965242	-27.3928	42.0599	-1.26917	9.10076	2.86862	-0.303924
Oribatida	HR3	Litter | Soil	-29.254	1.92009	-26.4162	17.4842	-1.25743	1.22843	2.83779	-3.17752
Oribatida	BF2	Litter | Soil	-31.8087	0.0184242	-30.271	33.511	-1.24047	0.376205	1.5377	-1.2589
Oribatida	BF4	Litter | Soil	-31.2934	-0.665576	-27.8146	46.4062	-1.19762	10.1217	3.47882	-0.532046
Oribatida	BO3	Litter | Soil	-30.2376	0.842424	-27.3307		-1.18972	22.0824	2.90689	-2.03214
Oribatida	BF2	Litter | Soil	-31.8087	0.0184242	-27.2377	50.792	-1.1894	10.9258	4.57097	-1.20783
Oribatida	BF2	Litter | Soil	-31.8087	0.0184242	-30.5992	34.207	-1.17811	0.12859	1.20946	-1.19653
Oribatida	BJ2	Litter | Soil	-29.8831	-2.73158	-28.2356	47.562	-1.14289	10.6158	1.64751	1.58869
Oribatida	BJ3	Litter | Soil	-31.0231	-2.16658	-26.1223		-1.12826	22.34	4.9008	1.03831
Oribatida	BF2	Litter | Soil	-31.8087	0.0184242	-30.8246	36.0158	-1.10407	0.428029	0.984107	-1.1225
Oribatida	BF4	Litter | Soil	-31.2934	-0.665576	-27.8153	49.7281	-1.07815	10.6289	3.47808	-0.412572
Oribatida	BF2	Litter | Soil	-31.8087	0.0184242	-26.5342	41.3359	-1.06403	4.73699	5.2745	-1.08246
Oribatida	HF1	Litter | Soil	-30.8093	0.201758	-28.235	32.5499	-1.05148	5.15877	2.57433	-1.25323
Oribatida	HR1	Litter | Soil	-28.8028	-0.405242	-25.2366	45.4004	-1.03953	2.6756	3.56626	-0.634286
Oribatida	HF2	Litter | Soil	-31.2236	0.0320909	-27.5431		-1.03526		3.6805	-1.06735
Oribatida	BR1	Litter | Soil	-29.7619	-1.91558	-33.8244	56.6267	-1.00129	9.79148	-4.0625	0.91429
Oribatida	BF2	Litter | Soil	-31.8087	0.0184242	-24.7186	51.4304	-0.980376	7.87054	7.09006	-0.9988
Oribatida	BF2	Litter | Soil	-31.8087	0.0184242	-29.6362	40.4689	-0.979451	1.14033	2.17244	-0.997876
Oribatida	BJ3	Litter | Soil	-31.0231	-2.16658	-27.8997		-0.94062	1.42985	3.12341	1.22596
Oribatida	HF2	Litter | Soil	-31.2236	0.0320909	-28.2434	50.3766	-0.919356	10.4521	2.98018	-0.951447
Oribatida	HF3	Litter | Soil	-31.048	0.290091	-30.2023		-0.885964	0.0366074	0.845732	-1.17606
Oribatida	HF1	Litter | Soil	-30.8093	0.201758	-28.7573	65.1037	-0.885421	9.23949	2.05198	-1.08718
Oribatida	BO4	Litter | Soil	-32.141	-0.193909	-28.7862	34.2271	-0.864562	0.991952	3.35479	-0.670653
Oribatida	BJ4	Litter | Soil	-31.4008	-1.65358	-27.4481	36.9001	-0.799916	7.93719	3.95268	0.85366
Oribatida	HF1	Litter | Soil	-30.8093	0.201758	-27.4983	36.008	-0.799202	6.86121	3.31104	-1.00096
Oribatida	HF4	Litter | Soil	-30.762	0.250091	-29.0111	45.1568	-0.793904	7.45052	1.75085	-1.04399
Oribatida	BJ3	Litter | Soil	-31.0231	-2.16658	-27.1387	26.2805	-0.784709	2.42252	3.88445	1.38187
Oribatida	BF4	Litter | Soil	-31.2934	-0.665576	-26.601	30.6929	-0.765789	4.967	4.69238	-0.100213
Oribatida	HF2	Litter | Soil	-31.2236	0.0320909	-28.7502	42.7696	-0.756439	7.94361	2.47338	-0.788529
Oribatida	HF1	Litter | Soil	-30.8093	0.201758	-27.1432	37.6902	-0.740828	7.07168	3.66609	-0.942585
Oribatida	BJ4	Litter | Soil	-31.4008	-1.65358	-27.122	33.9688	-0.696548	7.27548	4.27877	0.957028
Oribatida	BF1	Litter | Soil	-28.7176	0.468591	-23.6969	55.6658	-0.679477	8.39392	5.02067	-1.14807
Oribatida	BF2	Litter | Soil	-31.8087	0.0184242	-28.8401	35.43	-0.664329	1.05814	2.96857	-0.682753
Oribatida	HF1	Litter | Soil	-30.8093	0.201758	-28.9666	29.1343	-0.653483	4.48294	1.84268	-0.85524
Oribatida	HJ3	Litter | Soil	-29.7035	-0.470576	-26.7341	45.7945	-0.588667	11.0907	2.96945	-0.118091
Oribatida	BF1	Litter | Soil	-28.7176	0.468591	-26.7537	46.4159	-0.572874	9.55866	1.96388	-1.04146
Oribatida	BJ3	Litter | Soil	-31.0231	-2.16658	-23.9574		-0.569263	13.2109	7.06577	1.59731
Oribatida	BJ3	Litter | Soil	-31.0231	-2.16658	-25.95		-0.556263		5.07311	1.61031
Oribatida	BF4	Litter | Soil	-31.2934	-0.665576	-27.7109	45.3972	-0.552406	9.76377	3.58248	0.11317
Oribatida	BF4	Litter | Soil	-31.2934	-0.665576	-27.8232	68.2691	-0.539584	9.55168	3.47023	0.125992
Oribatida	BF1	Litter | Soil	-28.7176	0.468591	-26.4831	30.3227	-0.536429	1.14917	2.23449	-1.00502
Oribatida	BF4	Litter | Soil	-31.2934	-0.665576	-24.6805	43.7249	-0.530404	4.38212	6.6129	0.135171
Oribatida	BF3	Litter | Soil	-31.6749	0.525091	-26.4787		-0.525228		5.19617	-1.05032
Oribatida	HR1	Litter | Soil	-28.8028	-0.405242	-25.4598	33.6818	-0.522429	4.89786	3.34304	-0.117186
Oribatida	BJ2	Litter | Soil	-29.8831	-2.73158	-26.568	32.7664	-0.515253	5.90359	3.31509	2.21632
Oribatida	HR4	Litter | Soil	-28.8268	1.06809	-26.6805	29.7752	-0.497182	2.15745	2.1463	-1.56527
Oribatida	BF3	Litter | Soil	-31.6749	0.525091	-27.8268	42.7994	-0.480481	9.13275	3.84815	-1.00557
Oribatida	BJ4	Litter | Soil	-31.4008	-1.65358	-30.2925		-0.468428		1.10832	1.18515
Oribatida	BJ4	Litter | Soil	-31.4008	-1.65358	-24.7082	30.5055	-0.466263	3.48925	6.69257	1.18731
Oribatida	BF3	Litter | Soil	-31.6749	0.525091	-27.3567	34.8673	-0.460345	2.76144	4.31821	-0.985436
Oribatida	HJ4	Litter | Soil	-30.2614	-0.965242	-26.6273	55.5509	-0.449167	6.19206	3.63416	0.516076
Oribatida	HF1	Litter | Soil	-30.8093	0.201758	-27.1612	41.4568	-0.44543	8.77646	3.64808	-0.647187
Oribatida	BF2	Litter | Soil	-31.8087	0.0184242	-28.1728	26.4074	-0.415659	0.832628	3.63585	-0.434083
Oribatida	BF1	Litter | Soil	-28.7176	0.468591	-26.5946	66.3227	-0.392167	4.831	2.12292	-0.860758
Oribatida	BJ3	Litter | Soil	-31.0231	-2.16658	-26.1738	28.4142	-0.390263	4.69285	4.84938	1.77631
Oribatida	HF1	Litter | Soil	-30.8093	0.201758	-28.7412	56.2896	-0.367003	10.804	2.06812	-0.568761
Oribatida	BJ2	Litter | Soil	-29.8831	-2.73158	-28.0969		-0.352891	23.7005	1.78617	2.37869
Oribatida	HF3	Litter | Soil	-31.048	0.290091	-30.5657	34.7536	-0.294287	0.585421	0.482293	-0.584378
Oribatida	BF2	Litter | Soil	-31.8087	0.0184242	-30.7345	32.2417	-0.238296	0.361659	1.07423	-0.25672
Oribatida	BJ4	Litter | Soil	-31.4008	-1.65358	-27.9508	30.7233	-0.215479	3.48101	3.45006	1.4381
Oribatida	BJ5	Litter | Soil	-32.4539	-1.26141	-30.2282	45.9481	-0.206263	9.96303	2.22569	1.05515
Oribatida	BR2	Litter | Soil	-29.7129	-2.01758	-27.9248	44.3257	-0.187286	10.3175	1.78809	1.83029
Oribatida	HF2	Litter | Soil	-31.2236	0.0320909	-27.0133	42.4922	-0.176263	6.38913	4.21024	-0.208354
Oribatida	HJ4	Litter | Soil	-30.2614	-0.965242	-26.9785	50.5635	-0.145667	12.6022	3.28296	0.819576
Oribatida	BF4	Litter | Soil	-31.2934	-0.665576	-27.6779	81.2692	-0.14534	13.0079	3.61553	0.520236
Oribatida	BF3	Litter | Soil	-31.6749	0.525091	-25.5528	30.3758	-0.134667	4.11628	6.12215	-0.659758
Oribatida	HO2	Litter | Soil	-28.9606	0.531424	-25.9581		-0.0877183	0.594591	3.0025	-0.619143
Oribatida	BF2	Litter | Soil	-31.8087	0.0184242	-27.286	60.2667	-0.0686667	8.37271	4.52272	-0.0870909
Oribatida	HJ3	Litter | Soil	-29.7035	-0.470576	-28.8619	31.5833	-0.0429795	1.03331	0.841594	0.427596
Oribatida	BJ2	Litter | Soil	-29.8831	-2.73158	-24.166	36.6847	-0.0364286	5.87916	5.71707	2.69515
Oribatida	BF1	Litter | Soil	-28.7176	0.468591	-26.8592	44.346	-0.0206392	6.91264	1.85833	-0.48923
Oribatida	HR1	Litter | Soil	-28.8028	-0.405242	-26.0947	41.231	-0.00728571	7.22916	2.70814	0.397957
Oribatida	BF4	Litter | Soil	-31.2934	-0.665576	-27.9661	32.5541	0.0131713	4.47062	3.32727	0.678747
Oribatida	BF3	Litter | Soil	-31.6749	0.525091	-27.6127	51.4898	0.0323333	5.34957	4.06219	-0.492758
Oribatida	HF1	Litter | Soil	-30.8093	0.201758	-28.5288	44.1549	0.0418807	7.19796	2.28051	-0.159877
Oribatida	HF2	Litter | Soil	-31.2236	0.0320909	-25.3402	36.8368	0.0577368	2.66997	5.88331	0.0256459
Oribatida	HR1	Litter | Soil	-28.8028	-0.405242	-25.5702		0.0710626		3.23263	0.476305
Oribatida	HF1	Litter | Soil	-30.8093	0.201758	-28.5126	42.1424	0.0722046	8.56599	2.29669	-0.129553
Oribatida	BO3	Litter | Soil	-30.2376	0.842424	-26.4461	53.979	0.116023	6.68792	3.79154	-0.726402
Oribatida	HO2	Litter | Soil	-28.9606	0.531424	-28.1743	41.7623	0.121714	7.75803	0.786293	-0.40971
Oribatida	BJ4	Litter | Soil	-31.4008	-1.65358	-26.7566		0.129043		4.64417	1.78262
Oribatida	BF1	Litter | Soil	-28.7176	0.468591	-26.7914		0.159333	7.92825	1.92611	-0.309258
Oribatida	BF2	Litter | Soil	-31.8087	0.0184242	-27.7383	67.9232	0.175302	10.4733	4.07043	0.156878
Oribatida	BJ3	Litter | Soil	-31.0231	-2.16658	-22.9576	31.2859	0.178714	3.82109	8.06559	2.34529
Oribatida	HJ1	Litter | Soil	-30.1164	0.158591	-26.3883	46.9832	0.193833	9.72557	3.72815	0.0352424
Oribatida	BF4	Litter | Soil	-31.2934	-0.665576	-27.0495	47.9093	0.200333	9.04942	4.24392	0.865909
Oribatida	HR4	Litter | Soil	-28.8268	1.06809	-26.6281	21.5109	0.248842	2.72087	2.19877	-0.819249
Oribatida	BJ2	Litter | Soil	-29.8831	-2.73158	-26.2657		0.250714	8.22676	3.61745	2.98229
Oribatida	HJ2	Litter | Soil	-30.8039	0.673424	-28.3745	45.2941	0.250833	7.78494	2.42943	-0.422591
Oribatida	HJ4	Litter | Soil	-30.2614	-0.965242	-27.5159	54.4141	0.280833	10.9651	2.74556	1.24608
Oribatida	HF3	Litter | Soil	-31.048	0.290091	-29.1463	54.8308	0.32685	10.4091	1.90167	0.0367589
Oribatida	BF4	Litter | Soil	-31.2934	-0.665576	-27.4595	50.4192	0.328655	11.2641	3.83386	0.994231
Oribatida	HF2	Litter	-31.5546	-0.660909	-27.5907	34.9454	0.328929	7.26954	3.96382	0.989838
Oribatida	HJ4	Litter | Soil	-30.2614	-0.965242	-28.3756	79.605	0.329161	9.97347	1.88587	1.2944
Oribatida	BJ2	Litter | Soil	-29.8831	-2.73158	-27.2983	51.9871	0.330818	4.01967	2.58482	3.06239
Oribatida	BJ2	Litter | Soil	-29.8831	-2.73158	-29.7395		0.336642		0.143574	3.06822
Oribatida	BJ2	Litter | Soil	-29.8831	-2.73158	-30.3207	51.1775	0.351216	9.04198	-0.437598	3.08279
Oribatida	BJ3	Litter | Soil	-31.0231	-2.16658	-26.445	55.0682	0.382512	6.9867	4.57814	2.54909
Oribatida	BJ4	Litter | Soil	-31.4008	-1.65358	-24.5584	63.0651	0.382737	10.5073	6.84244	2.03631
Oribatida	HR4	Litter | Soil	-28.8268	1.06809	-22.2485	31.3223	0.413571	4.58537	6.57836	-0.654519
Oribatida	BJ3	Litter | Soil	-31.0231	-2.16658	-25.5187	51.6672	0.420737	4.14561	5.50441	2.58731
Oribatida	BF3	Litter | Soil	-31.6749	0.525091	-27.4954	43.3724	0.435833	8.23863	4.17952	-0.0892576
Oribatida	HF3	Litter | Soil	-31.048	0.290091	-26.189		0.443702		4.85899	0.153611
Oribatida	BJ4	Litter | Soil	-31.4008	-1.65358	-28.2092	27.7997	0.44799	4.16953	3.19164	2.10157
Oribatida	HR1	Litter | Soil	-28.8028	-0.405242	-25.9399	34.3367	0.450664	1.71276	2.86293	0.855907
Oribatida	BR1	Litter | Soil	-29.7619	-1.91558	-24.6291	40.9174	0.464818	2.91445	5.13281	2.38039
Oribatida	HJ1	Litter | Soil	-30.1164	0.158591	-26.6731	51.9004	0.471305	7.20664	3.44335	0.312714
Oribatida	HO2	Litter | Soil	-28.9606	0.531424	-25.7874		0.496576		3.17324	-0.0348478
Oribatida	HR2	Litter | Soil	-29.2976	-1.29024	-27.9427	53.3672	0.533714	10.9155	1.35499	1.82396
Oribatida	HF1	Litter | Soil	-30.8093	0.201758	-27.7565	28.8582	0.556933	1.60975	3.05277	0.355176
Oribatida	BR4	Litter | Soil	-29.5615	-0.665242	-26.0337	15.8092	0.593571	1.35523	3.52777	1.25881
Oribatida	BF1	Litter | Soil	-28.7176	0.468591	-25.9343	89.8994	0.606522	10.5571	2.78324	0.137931
Oribatida	HJ2	Litter | Soil	-30.8039	0.673424	-27.4961	51.4085	0.607737	10.5572	3.30783	-0.0656874
Oribatida	BJ4	Litter | Soil	-31.4008	-1.65358	-27.9859	31.6255	0.62139	6.31443	3.4149	2.27497
Oribatida	HF4	Litter	-30.5505	0.553091	-27.7926	32.3802	0.633929	6.17742	2.75787	0.0808377
Oribatida	BF2	Litter | Soil	-31.8087	0.0184242	-26.5921	50.8387	0.644565	7.91784	5.21661	0.626141
Oribatida	HO4	Litter | Soil	-30.2671	-0.224242	-30.2718	31.0648	0.65226	3.61297	-0.00467872	0.876502
Oribatida	BF3	Litter | Soil	-31.6749	0.525091	-27.0704	42.4016	0.656375	9.1914	4.6045	0.131284
Oribatida	BJ3	Litter | Soil	-31.0231	-2.16658	-29.8173	18.6915	0.671015	2.19727	1.20583	2.83759
Oribatida	BJ2	Litter | Soil	-29.8831	-2.73158	-26.9305	51.8768	0.68835	6.87149	2.9526	3.41993
Oribatida	HO4	Litter | Soil	-30.2671	-0.224242	-28.9223	40.222	0.695301	8.1756	1.34488	0.919543
Oribatida	HF4	Litter | Soil	-30.762	0.250091	-30.6681	33.8749	0.706014	0.515554	0.0938517	0.455923
Oribatida	BF4	Litter | Soil	-31.2934	-0.665576	-27.9679	34.2372	0.714366	5.52992	3.32545	1.37994
Oribatida	HJ1	Litter | Soil	-30.1164	0.158591	-25.5688	55.4464	0.715991	6.64771	4.54763	0.5574
Oribatida	BF2	Litter | Soil	-31.8087	0.0184242	-26.0436	46.5904	0.719888	10.3058	5.76505	0.701464
Oribatida	HF2	Litter | Soil	-31.2236	0.0320909	-26.8412	43.812	0.722737	6.09444	4.38231	0.690646
Oribatida	HF4	Litter | Soil	-30.762	0.250091	-29.1319	54.8861	0.727561	10.5065	1.63011	0.47747
Oribatida	HR1	Litter | Soil	-28.8028	-0.405242	-27.8861		0.748714		0.916734	1.15396
Oribatida	HF2	Litter | Soil	-31.2236	0.0320909	-29.1052		0.755778	15.4483	2.11835	0.723687
Oribatida	HF1	Litter | Soil	-30.8093	0.201758	-28.1532	49.0215	0.78823	8.85764	2.65611	0.586472
Oribatida	BO3	Litter | Soil	-30.2376	0.842424	-28.8499	38.0279	0.790818	3.47139	1.38774	-0.0516061
Oribatida	BR1	Litter | Soil	-29.7619	-1.91558	-29.1806	40.5495	0.803714	8.45908	0.581367	2.71929
Oribatida	BF4	Litter | Soil	-31.2934	-0.665576	-27.1557		0.807738		4.1377	1.47331
Oribatida	BF4	Litter | Soil	-31.2934	-0.665576	-27.0683	29.5035	0.810333	5.62013	4.22506	1.47591
Oribatida	BJ2	Litter | Soil	-29.8831	-2.73158	-26.0391	58.6563	0.814737	10.6872	3.84401	3.54631
Oribatida	HJ1	Litter | Soil	-30.1164	0.158591	-25.1351	31.8397	0.822571	4.77349	4.98135	0.663981
Oribatida	BJ2	Litter | Soil	-29.8831	-2.73158	-26.9886	43.6505	0.849052	7.70308	2.89454	3.58063
Oribatida	BF1	Litter | Soil	-28.7176	0.468591	-25.0023		0.849833	0.252789	3.71521	0.381242
Oribatida	BF1	Litter | Soil	-28.7176	0.468591	-26.5122	54.3985	0.853798	11.6324	2.20532	0.385207
Oribatida	HJ4	Litter | Soil	-30.2614	-0.965242	-27.8708	46.3121	0.854148	2.92502	2.39064	1.81939
Oribatida	BF4	Litter | Soil	-31.2934	-0.665576	-27.1843	65.7902	0.883895	11.9396	4.10908	1.54947
Oribatida	HF4	Litter | Soil	-30.762	0.250091	-29.6117	53.9878	0.885504	10.8348	1.1503	0.635413
Oribatida	HO2	Litter | Soil	-28.9606	0.531424	-27.1253		0.885983		1.83533	0.354558
Oribatida	BJ2	Litter | Soil	-29.8831	-2.73158	-25.0079	27.4327	0.888737	4.12263	4.87523	3.62031
Oribatida	BF4	Litter | Soil	-28.7176	0.468591	-26.1665	40.8694	0.889833	9.57468	2.55107	0.421242
Oribatida	HF3	Litter | Soil	-31.048	0.290091	-28.1468	34.9845	0.894824	1.39675	2.90118	0.604733
Oribatida	HJ2	Litter | Soil	-30.8039	0.673424	-28.0531	46.8337	0.899333	3.86002	2.75088	0.225909
Oribatida	HF2	Litter | Soil	-31.2236	0.0320909	-26.8885	51.3024	0.902737	11.8964	4.33509	0.870646
Oribatida	BF2	Litter | Soil	-31.8087	0.0184242	-28.2242	39.3427	0.903795	6.76158	3.58447	0.885371
Oribatida	HF4	Litter | Soil	-30.762	0.250091	-28.5366	67.18	0.911505	11.8162	2.22539	0.661414
Oribatida	HF1	Litter | Soil	-30.8093	0.201758	-28.7935	35.9721	0.918574	1.54251	2.01583	0.716816
Oribatida	BF2	Litter | Soil	-31.8087	0.0184242	-26.6892	36.4124	0.932833	7.46587	5.11952	0.914409
Oribatida	HJ2	Litter	-30.9372	1.15409	-27.5918	30.6382	0.979929	5.70179	3.34542	-0.174162
Oribatida	HR2	Litter | Soil	-29.2976	-1.29024	-27.3341	45.2982	0.981714	11.1786	1.96351	2.27196
Oribatida	HF4	Litter | Soil	-30.762	0.250091	-26.7338	55.9529	0.988737	5.89589	4.02817	0.738646
Oribatida	HO4	Litter | Soil	-30.2671	-0.224242	-28.7171	42.636	1.00714	8.70459	1.55002	1.23138
Oribatida	HR4	Litter | Soil	-28.8268	1.06809	-32.5384	56.5404	1.01171	11.9712	-3.71158	-0.0563766
Oribatida	BF3	Litter | Soil	-31.6749	0.525091	-27.624	44.497	1.02449	9.03169	4.05091	0.499397
Oribatida	HO4	Litter | Soil	-30.2671	-0.224242	-26.9229	22.786	1.03624	2.82996	3.34425	1.26048
Oribatida	BJ3	Litter | Soil	-31.0231	-2.16658	-26.3043	32.2664	1.04607	4.1797	4.71881	3.21265
Oribatida	BJ2	Litter | Soil	-29.8831	-2.73158	-26.5432	20.7516	1.0636	3.77827	3.33987	3.79518
Oribatida	HF1	Litter | Soil	-30.8093	0.201758	-27.9605	42.1769	1.07012	8.14506	2.84882	0.868362
Oribatida	BF4	Litter | Soil	-31.2934	-0.665576	-26.1073	47.0498	1.07133	7.79371	5.18613	1.73691
Oribatida	HJ4	Litter | Soil	-30.2614	-0.965242	-26.7084	57.2468	1.09333	10.2347	3.55303	2.05858
Oribatida	BJ3	Litter | Soil	-31.0231	-2.16658	-25.5684	43.1802	1.09374	6.02981	5.4547	3.26031
Oribatida	HR1	Litter | Soil	-28.8028	-0.405242	-20.5676	66.1569	1.0992	7.20664	8.23521	1.50444
Oribatida	HJ1	Litter | Soil	-30.1164	0.158591	-27.0891	44.9211	1.10083	8.49539	3.02733	0.942242
Oribatida	BF2	Litter | Soil	-31.8087	0.0184242	-27.5228	46.6619	1.10426	10.4169	4.28584	1.08583
Oribatida	BO3	Litter | Soil	-30.2376	0.842424	-26.254	39.3672	1.10455	7.9604	3.98356	0.262127
Oribatida	BF1	Litter | Soil	-28.7176	0.468591	-26.6798	49.95	1.10783	11.5112	2.0378	0.639242
Oribatida	BO3	Litter | Soil	-30.2376	0.842424	-29.4185	44.2329	1.10871	9.36727	0.819137	0.26629
Oribatida	BF3	Litter | Soil	-31.6749	0.525091	-27.5223		1.11245		4.15265	0.587364
Oribatida	BF4	Litter | Soil	-31.2934	-0.665576	-27.4842	52.903	1.12715	7.14745	3.80923	1.79272
Oribatida	HF1	Litter | Soil	-30.8093	0.201758	-30.6875	50.906	1.1407	9.72356	0.121754	0.938941
Oribatida	HR1	Litter | Soil	-28.8028	-0.405242	-28.7424	44.361	1.14171	9.88942	0.0604664	1.54696
Oribatida	BF1	Litter | Soil	-28.7176	0.468591	-24.0594	51.3888	1.15733	7.80012	4.65812	0.688742
Oribatida	BF2	Litter | Soil	-31.8087	0.0184242	-27.3734	43.925	1.16783	1.52782	4.43525	1.14941
Oribatida	HF4	Litter | Soil	-30.762	0.250091	-26.8057	36.8228	1.17474	4.03495	3.95628	0.924646
Oribatida	HJ3	Litter | Soil	-29.7035	-0.470576	-28.0203	56.4216	1.17553	6.65971	1.68323	1.64611
Oribatida	BO5	Litter | Soil	-29.8942	1.27309	-29.0028	31.1353	1.17654	2.49076	0.891384	-0.0965469
Oribatida	HF1	Litter | Soil	-30.8093	0.201758	-29.1234	46.9227	1.20628	6.7209	1.68586	1.00453
Oribatida	BF3	Litter | Soil	-31.6749	0.525091	-27.0069	33.2728	1.22483	3.26803	4.66799	0.699742
Oribatida	BF1	Litter | Soil	-28.7176	0.468591	-27.4204	47.4368	1.23533	6.9192	1.29711	0.766742
Oribatida	HJ2	Litter | Soil	-30.8039	0.673424	-26.8646	37.6478	1.24333	6.05867	3.93938	0.569909
Oribatida	BJ4	Litter | Soil	-31.4008	-1.65358	-28.4077	41.9457	1.24487	6.69662	2.99314	2.89844
Oribatida	BF2	Litter | Soil	-31.8087	0.0184242	-27.0265	47.6976	1.27283	3.72421	4.78217	1.25441
Oribatida	HJ2	Litter | Soil	-30.8039	0.673424	-26.9335	48.1587	1.28883	6.74546	3.87045	0.615409
Oribatida	BR3	Litter | Soil	-30.014	-1.54624	-26.2478	61.0228	1.29811	7.07795	3.76623	2.84435
Oribatida	HF4	Litter | Soil	-30.762	0.250091	-27.3237		1.30374	20.365	3.43824	1.05365
Oribatida	HF1	Litter | Soil	-30.8093	0.201758	-28.2842	49.5585	1.3099	8.58704	2.52509	1.10814
Oribatida	BO3	Litter | Soil	-30.2376	0.842424	-25.1111	38.2224	1.31682	3.44435	5.12646	0.474394
Oribatida	BF1	Litter | Soil	-28.7176	0.468591	-26.5551	52.6635	1.31683	12.3129	2.16249	0.848242
Oribatida	BJ3	Litter | Soil	-31.0231	-2.16658	-26.875	57.3566	1.31871	10.4509	4.1481	3.48529
Oribatida	BF3	Litter | Soil	-31.6749	0.525091	-29.0466	38.4667	1.32889	6.53212	2.62829	0.803794
Oribatida	HF1	Litter | Soil	-30.8093	0.201758	-28.2925	51.0535	1.33123	3.45376	2.51675	1.12948
Oribatida	HF1	Litter | Soil	-30.8093	0.201758	-26.4627		1.34274		4.34665	1.14098
Oribatida	BR3	Litter | Soil	-30.014	-1.54624	-26.8689	50.1325	1.34782	3.7093	3.14516	2.89406
Oribatida	HF3	Litter | Soil	-31.048	0.290091	-27.7451	50.0507	1.35474	12.4848	3.30286	1.06465
Oribatida	HO3	Litter | Soil	-28.8398	1.00176	-26.4562	39.544	1.35507	5.40743	2.38351	0.35331
Oribatida	BJ2	Litter | Soil	-29.8831	-2.73158	-26.229	74.5507	1.36174	8.86578	3.6541	4.09331
Oribatida	HF1	Litter | Soil	-30.8093	0.201758	-27.3211	44.3596	1.37274	7.86948	3.48825	1.17098
Oribatida	BF4	Litter | Soil	-31.2934	-0.665576	-28.203	59.2001	1.37488	11.9189	3.09037	2.04046
Oribatida	BF3	Litter | Soil	-31.6749	0.525091	-28.1406	37.4026	1.37732	2.0269	3.53432	0.852228
Oribatida	BF2	Litter | Soil	-31.8087	0.0184242	-29.7289		1.39921		2.0798	1.38079
Oribatida	HR4	Litter | Soil	-28.8268	1.06809	-27.4058		1.41082	5.65857	1.42101	0.342727
Oribatida	HO1	Litter | Soil	-29.5853	1.63176	-23.8604		1.43633	1.69132	5.72497	-0.195426
Oribatida	BF2	Litter | Soil	-31.8087	0.0184242	-25.9649	54.4541	1.43833	9.16153	5.84379	1.41991
Oribatida	BJ5	Litter | Soil	-32.4539	-1.26141	-27.955	56.2242	1.4476	10.2353	4.49892	2.70901
Oribatida	BO5	Litter | Soil	-29.8942	1.27309	-29.7187	42.2985	1.47309	7.66625	0.175464	0.200003
Oribatida	HJ4	Litter | Soil	-30.2614	-0.965242	-27.6958	55.3865	1.47896	11.2389	2.56566	2.4442
Oribatida	BR3	Litter | Soil	-30.014	-1.54624	-25.8573	39.1695	1.4814	5.94712	4.15677	3.02765
Oribatida	BJ2	Litter | Soil	-29.8831	-2.73158	-28.0118	42.0749	1.48271	9.01507	1.8713	4.21429
Oribatida	BJ5	Litter | Soil	-32.4539	-1.26141	-26.8926		1.49074	21.5675	5.56132	2.75215
Oribatida	HJ1	Litter | Soil	-30.1164	0.158591	-26.9588		1.49183	22.7042	3.15762	1.33324
Oribatida	HR1	Litter | Soil	-28.8028	-0.405242	-25.9279	54.126	1.50305	6.44868	2.87496	1.90829
Oribatida	HF1	Litter | Soil	-30.8093	0.201758	-30.431	34.861	1.50315	0.136295	0.3783	1.30139
Oribatida	HF4	Litter | Soil	-30.762	0.250091	-28.6066	47.1756	1.54232	8.4788	2.15537	1.29223
Oribatida	BF3	Litter | Soil	-31.6749	0.525091	-29.8549	33.1511	1.55566	5.20315	1.82004	1.03057
Oribatida	BJ3	Litter | Soil	-31.0231	-2.16658	-27.3458	61.0995	1.5606	11.6712	3.67732	3.72718
Oribatida	HF3	Litter | Soil	-31.048	0.290091	-29.5884	35.1718	1.56229	0.965848	1.45954	1.27219
Oribatida	HF3	Litter | Soil	-31.048	0.290091	-26.4158	48.5448	1.58574	9.23571	4.63217	1.29565
Oribatida	HJ2	Litter | Soil	-30.8039	0.673424	-25.098		1.60283		5.70593	0.929409
Oribatida	HJ2	Litter | Soil	-30.8039	0.673424	-25.5918	48.3718	1.60533	7.42029	5.21209	0.931909
Oribatida	BF3	Litter | Soil	-31.6749	0.525091	-28.2322	44.0315	1.6094	8.15408	3.44271	1.08431
Oribatida	BF4	Litter | Soil	-31.2934	-0.665576	-26.8049	53.6214	1.60996	7.94298	4.48849	2.27554
Oribatida	HR4	Litter | Soil	-28.8268	1.06809	-22.746	29.5431	1.61757	4.8375	6.08082	0.549481
Oribatida	HF1	Litter | Soil	-30.8093	0.201758	-28.4678	36.113	1.6186	3.75315	2.34153	1.41684
Oribatida	HJ1	Litter | Soil	-30.1164	0.158591	-27.371	77.3666	1.6308	9.45871	2.74546	1.47221
Oribatida	HO4	Litter | Soil	-30.2671	-0.224242	-27.3001	30.8969	1.6362	3.44889	2.96709	1.86045
Oribatida	HJ4	Litter | Soil	-30.2614	-0.965242	-26.6686	51.5098	1.65383	10.4054	3.59286	2.61908
Oribatida	BF2	Litter | Soil	-31.8087	0.0184242	-25.5645	55.6611	1.67533	4.30848	6.24421	1.65691
Oribatida	BO3	Litter | Soil	-30.2376	0.842424	-25.8582	73.7537	1.6786	12.4606	4.37941	0.836176
Oribatida	HF3	Litter | Soil	-31.048	0.290091	-27.2844		1.67874		3.76356	1.38865
Oribatida	HF1	Litter | Soil	-30.8093	0.201758	-27.2619	23.4393	1.70174	1.67901	3.54741	1.49998
Oribatida	BO3	Litter | Soil	-30.2376	0.842424	-30.1346	55.0909	1.71032	9.81554	0.103011	0.867897
Oribatida	BF2	Litter | Soil	-31.8087	0.0184242	-28.0787	30.4152	1.71483	2.40054	3.73001	1.69641
Oribatida	BF4	Litter | Soil	-31.2934	-0.665576	-27.9582	43.3598	1.71983	9.10516	3.33516	2.38541
Oribatida	BO5	Litter | Soil	-29.8942	1.27309	-26.8697	19.1001	1.72727	3.09636	3.02446	0.454181
Oribatida	BF2	Litter | Soil	-31.8087	0.0184242	-28.4341	35.7988	1.73607	1.23559	3.37456	1.71765
Oribatida	BJ5	Litter | Soil	-32.4539	-1.26141	-28.3977	23.922	1.7464	3.086	4.05617	3.0078
Oribatida	BR2	Litter | Soil	-29.7129	-2.01758	-25.4124	78.7735	1.7466	14.0969	4.30047	3.76418
Oribatida	BF3	Litter | Soil	-31.6749	0.525091	-28.2487		1.75002	14.139	3.42616	1.22493
Oribatida	HF4	Litter | Soil	-30.762	0.250091	-29.2889	40.0358	1.75991	7.91355	1.47304	1.50982
Oribatida	BF1	Litter | Soil	-28.7176	0.468591	-27.9877	52.6287	1.77487	6.31542	0.729866	1.30628
Oribatida	HF1	Litter | Soil	-30.8093	0.201758	-30.3259	32.4417	1.80556	0.45004	0.483364	1.60381
Oribatida	BF1	Litter | Soil	-28.7176	0.468591	-26.7458	45.1152	1.81322	9.19259	1.97171	1.34463
Oribatida	BF4	Litter | Soil	-31.2934	-0.665576	-28.9422		1.81628		2.35123	2.48186
Oribatida	BR2	Litter | Soil	-29.7129	-2.01758	-23.2457	25.7993	1.81757	3.28901	6.46722	3.83515
Oribatida	HR3	Litter | Soil	-29.254	1.92009	-23.9108	30.6662	1.81817	4.53796	5.34321	-0.10192
Oribatida	BF1	Litter	-32.1422	-0.687409	-25.7592	21.7427	1.82793	2.82988	6.38301	2.51534
Oribatida	HJ4	Litter | Soil	-30.2614	-0.965242	-26.2248	49.3799	1.839	9.70413	4.0366	2.80424
Oribatida	BJ2	Litter | Soil	-29.8831	-2.73158	-24.4894	56.3615	1.84774	5.4643	5.3937	4.57931
Oribatida	HF3	Litter | Soil	-31.048	0.290091	-29.2882		1.85266		1.75982	1.56257
Oribatida	BF2	Litter | Soil	-31.8087	0.0184242	-27.2298	64.1299	1.85965	10.2639	4.57889	1.84122
Oribatida	HJ4	Litter | Soil	-30.2614	-0.965242	-26.6334	52.9604	1.86033	12.8037	3.62804	2.82558
Oribatida	BR4	Litter | Soil	-29.5615	-0.665242	-25.6704	81.2645	1.8616	14.7858	3.8911	2.52684
Oribatida	BF2	Litter	-32.2495	-0.670909	-27.893	22.1346	1.86893	3.63754	4.35643	2.53984
Oribatida	BO4	Litter | Soil	-32.141	-0.193909	-25.6874		1.87417	17.0173	6.45364	2.06808
Oribatida	BR3	Litter | Soil	-30.014	-1.54624	-25.9872	58.589	1.87471	7.16374	4.0268	3.42095
Oribatida	BF4	Litter | Soil	-31.2934	-0.665576	-28.1827	54.5026	1.88629	8.81855	3.11072	2.55186
Oribatida	HJ2	Litter | Soil	-30.8039	0.673424	-27.1285	52.6159	1.89633	7.91624	3.67548	1.22291
Oribatida	BF4	Litter | Soil	-31.2934	-0.665576	-25.3881	57.3572	1.89783	7.11189	5.90527	2.56341
Oribatida	HO3	Litter | Soil	-28.8398	1.00176	-25.8622	64.2191	1.90897	9.50174	2.9775	0.907214
Oribatida	HO3	Litter | Soil	-28.8398	1.00176	-28.6818		1.90897		0.157931	0.907214
Oribatida	HJ1	Litter | Soil	-30.1164	0.158591	-25.7534	79.5072	1.92633	11.3558	4.36302	1.76774
Oribatida	BR1	Litter | Soil	-29.7619	-1.91558	-29.0443	28.6467	1.93671	4.32349	0.717598	3.85229
Oribatida	BF3	Litter | Soil	-31.6749	0.525091	-26.9918	44.5769	1.94583	10.17	4.68315	1.42074
Oribatida	BF4	Litter | Soil	-31.2934	-0.665576	-27.9903	50.7655	1.94818	10.2287	3.30307	2.61375
Oribatida	HF4	Litter | Soil	-30.762	0.250091	-27.9323	35.0442	1.98239	2.70466	2.82962	1.7323
Oribatida	BF3	Litter | Soil	-31.6749	0.525091	-27.6177	30.4911	2.00052	5.11099	4.05722	1.47542
Oribatida	HR4	Litter | Soil	-28.8268	1.06809	-24.8598	29.5102	2.01891	4.94603	3.96706	0.950814
Oribatida	BJ2	Litter | Soil	-29.8831	-2.73158	-27.0289	43.0579	2.02811	8.19242	2.85425	4.75968
Oribatida	HF4	Litter | Soil	-30.762	0.250091	-26.6495	47.6274	2.03674	7.49544	4.11246	1.78665
Oribatida	HJ4	Litter | Soil	-30.2614	-0.965242	-26.9738	37.0591	2.04882	3.22806	3.28759	3.01406
Oribatida	BR2	Litter | Soil	-29.7129	-2.01758	-29.3921	35.4874	2.06271	7.22233	0.320772	4.08029
Oribatida	HR4	Litter | Soil	-28.8268	1.06809	-22.7593	34.6427	2.06857	4.64149	6.06752	1.00048
Oribatida	BR1	Litter | Soil	-29.7619	-1.91558	-25.0671	39.5067	2.07016	4.65881	4.69482	3.98573
Oribatida	HF4	Litter | Soil	-30.762	0.250091	-26.999		2.08174	22.4278	3.76296	1.83165
Oribatida	HF1	Litter | Soil	-30.8093	0.201758	-28.6512	47.5235	2.08483	7.49261	2.15813	1.88307
Oribatida	BJ4	Litter | Soil	-31.4008	-1.65358	-25.0132		2.0901	16.8382	6.38764	3.74368
Oribatida	BO4	Litter | Soil	-32.141	-0.193909	-26.9708	84.355	2.09051	12.7234	5.17022	2.28442
Oribatida	BF3	Litter | Soil	-31.6749	0.525091	-27.8896	39.8754	2.09398	6.98781	3.78527	1.56889
Oribatida	HF1	Litter | Soil	-30.8093	0.201758	-26.9682	38.278	2.10874	5.39847	3.84111	1.90698
Oribatida	HF1	Litter | Soil	-30.8093	0.201758	-26.5905	47.0464	2.11474	12.3355	4.21883	1.91298
Oribatida	HR1	Litter | Soil	-28.8028	-0.405242	-28.9945		2.11484		-0.191641	2.52008
Oribatida	BF3	Litter | Soil	-31.6749	0.525091	-29.1163	44.7745	2.11954	5.43846	2.55857	1.59445
Oribatida	BF3	Litter | Soil	-31.6749	0.525091	-26.5802		2.12683		5.09475	1.60174
Oribatida	BO3	Litter | Soil	-30.2376	0.842424	-26.1224		2.13468		4.11518	1.29226
Oribatida	BF2	Litter | Soil	-31.8087	0.0184242	-28.4695	79.1419	2.15364	7.79216	3.33919	2.13521
Oribatida	BJ5	Litter | Soil	-32.4539	-1.26141	-25.939	67.7022	2.15371	12.2445	6.51493	3.41512
Oribatida	HR1	Litter | Soil	-28.8028	-0.405242	-26.5823	47.7967	2.15535	5.82322	2.22057	2.56059
Oribatida	HR2	Litter | Soil	-29.2976	-1.29024	-24.8873	68.9326	2.15621	13.8993	4.41036	3.44646
Oribatida	BF3	Litter | Soil	-31.6749	0.525091	-27.1819	42.2269	2.17929	7.60699	4.49305	1.6542
Oribatida	BJ2	Litter | Soil	-29.8831	-2.73158	-27.119	72.1645	2.2006	12.9309	2.76414	4.93218
Oribatida	BF4	Litter | Soil	-31.2934	-0.665576	-25.6419	52.592	2.21683	6.75742	5.65149	2.88241
Oribatida	BJ5	Litter | Soil	-32.4539	-1.26141	-25.9133	52.0546	2.21871	11.9635	6.5406	3.48012
Oribatida	BR2	Litter | Soil	-29.7129	-2.01758	-28.1862		2.24057		1.52675	4.25815
Oribatida	BF2	Litter | Soil	-31.8087	0.0184242	-27.9903	29.2623	2.24444	1.10217	3.81835	2.22601
Oribatida	BJ4	Litter | Soil	-31.4008	-1.65358	-26.2038		2.24774		5.19698	3.90131
Oribatida	BF1	Litter | Soil	-28.7176	0.468591	-26.9156	41.3359	2.25083	6.3506	1.80196	1.78224
Oribatida	HF1	Litter | Soil	-30.8093	0.201758	-28.4612	45.4505	2.26221	5.66155	2.3481	2.06045
Oribatida	BF4	Litter | Soil	-31.2934	-0.665576	-27.4293	62.7271	2.26533	9.3217	3.86408	2.93091
Oribatida	BR2	Litter | Soil	-29.7129	-2.01758	-26.3607		2.26843		3.35216	4.28601
Oribatida	BF3	Litter | Soil	-31.6749	0.525091	-26.8159	40.563	2.27383	8.34812	4.85898	1.74874
Oribatida	HO3	Litter | Soil	-28.8398	1.00176	-27.6198	34.3905	2.2837	5.16598	1.21995	1.28195
Oribatida	HF3	Litter | Soil	-31.048	0.290091	-28.5986	65.4895	2.29916	8.8396	2.44937	2.00907
Oribatida	BF2	Litter | Soil	-31.8087	0.0184242	-27.2302	36.3549	2.30033	3.64379	4.57852	2.28191
Oribatida	HJ1	Litter | Soil	-30.1164	0.158591	-26.6767		2.30833	0.563125	3.43976	2.14974
Oribatida	BF4	Litter | Soil	-31.2934	-0.665576	-26.0536	41.4903	2.30933	7.16957	5.23978	2.97491
Oribatida	BO3	Litter | Soil	-30.2376	0.842424	-25.7522		2.31717	2.70829	4.48542	1.47475
Oribatida	BO5	Litter | Soil	-29.8942	1.27309	-29.8295	40.4806	2.32427	6.50227	0.0646878	1.05118
Oribatida	BO5	Litter | Soil	-29.8942	1.27309	-29.6105	41.5464	2.32481	7.69995	0.283707	1.05172
Oribatida	HF1	Litter | Soil	-30.8093	0.201758	-27.2954	45.0616	2.3316	6.37392	3.51389	2.12984
Oribatida	BF1	Litter | Soil	-28.7176	0.468591	-28.2316	59.8753	2.34158	8.6405	0.48593	1.87299
Oribatida	HF3	Litter | Soil	-31.048	0.290091	-25.6852	38.876	2.35074	4.468	5.36281	2.06065
Oribatida	HF4	Litter | Soil	-30.762	0.250091	-28.397	66.8675	2.36935	2.85794	2.36498	2.11926
Oribatida	BO5	Litter | Soil	-29.8942	1.27309	-29.1153	30.7292	2.37333	4.65858	0.778849	1.10024
Oribatida	HO1	Litter | Soil	-29.5853	1.63176	-25.873	67.7191	2.37638	9.97157	3.71238	0.744623
Oribatida	HO3	Litter | Soil	-28.8398	1.00176	-27.1414	17.3679	2.37642	1.37046	1.69837	1.37466
Oribatida	BJ4	Litter | Soil	-31.4008	-1.65358	-24.664	28.0043	2.37674	4.54505	6.73679	4.03031
Oribatida	HF4	Litter | Soil	-30.762	0.250091	-26.1339	46.3151	2.38774	7.54359	4.62803	2.13765
Oribatida	BO5	Litter | Soil	-29.8942	1.27309	-30.1047	42.1125	2.39129	8.5107	-0.210518	1.1182
Oribatida	BF3	Litter | Soil	-31.6749	0.525091	-26.6959	46.2331	2.40233	7.59929	4.979	1.87724
Oribatida	BR4	Litter | Soil	-29.5615	-0.665242	-23.409	26.0339	2.40357	4.54541	6.15249	3.06881
Oribatida	HJ1	Litter | Soil	-30.1164	0.158591	-24.7281	29.447	2.41483	4.88846	5.38831	2.25624
Oribatida	BF1	Litter | Soil	-28.7176	0.468591	-27.6027	41.6118	2.43024	7.14281	1.11489	1.96165
Oribatida	HF4	Litter | Soil	-30.762	0.250091	-27.5289	45.2885	2.43074	9.20064	3.23309	2.18065
Oribatida	BR3	Litter | Soil	-30.014	-1.54624	-26.7448	71.1488	2.43656	6.30581	3.2692	3.98281
Oribatida	BR3	Litter | Soil	-30.014	-1.54624	-25.0374	35.6262	2.43862	5.40375	4.97664	3.98486
Oribatida	BF2	Litter | Soil	-31.8087	0.0184242	-28.0502		2.43933	0.455789	3.7585	2.42091
Oribatida	HO1	Litter | Soil	-29.5853	1.63176	-28.3239	38.204	2.44848	7.15421	1.26141	0.816722
Oribatida	BR1	Litter | Soil	-29.7619	-1.91558	-35.3339	17.5071	2.45371	0.842544	-5.57202	4.36929
Oribatida	HF4	Litter | Soil	-30.762	0.250091	-26.9736	70.4298	2.45612	9.29784	3.78842	2.20603
Oribatida	BJ2	Litter | Soil	-29.8831	-2.73158	-25.1081	31.7823	2.46771	4.50665	4.77504	5.19929
Oribatida	BJ2	Litter | Soil	-29.8831	-2.73158	-27.7378		2.49419		2.14534	5.22577
Oribatida	BF3	Litter	-32.1422	-0.687409	-27.3679	25.4812	2.50793	3.88592	4.77426	3.19534
Oribatida	BF3	Litter | Soil	-31.6749	0.525091	-27.311	14.2448	2.52983	2.26948	4.36386	2.00474
Oribatida	BF1	Litter | Soil	-28.7176	0.468591	-25.4599	53.5344	2.54283	7.78046	3.25761	2.07424
Oribatida	HF1	Litter | Soil	-30.8093	0.201758	-27.4011	44.6096	2.56374	8.58488	3.40823	2.36198
Oribatida	BR3	Litter | Soil	-30.014	-1.54624	-27.5367	43.1632	2.56482	3.50586	2.47733	4.11106
Oribatida	BO3	Litter | Soil	-30.2376	0.842424	-29.4016	43.7374	2.57738	7.93588	0.835977	1.73496
Oribatida	HF1	Litter | Soil	-30.8093	0.201758	-25.6169	54.3808	2.61172	7.87564	5.19236	2.40996
Oribatida	HO3	Litter | Soil	-28.8398	1.00176	-27.8679	54.9524	2.61935	11.8395	0.971886	1.61759
Oribatida	HR1	Litter | Soil	-28.8028	-0.405242	-26.6766	36.4492	2.63071	5.19434	2.12618	3.03596
Oribatida	BF4	Litter | Soil	-31.2934	-0.665576	-28.1001	33.6065	2.67983	6.74973	3.19329	3.34541
Oribatida	HR2	Litter | Soil	-29.2976	-1.29024	-24.7846		2.68947		4.51302	3.97971
Oribatida	BF2	Litter | Soil	-31.8087	0.0184242	-26.5304	45.6669	2.69483	5.76131	5.27831	2.67641
Oribatida	BF4	Litter | Soil	-31.2934	-0.665576	-27.8652	37.1965	2.69506	7.25689	3.42821	3.36064
Oribatida	BJ4	Litter | Soil	-31.4008	-1.65358	-24.7314	84.1025	2.69746	12.968	6.66942	4.35103
Oribatida	BF3	Litter | Soil	-31.6749	0.525091	-26.3155	23.8778	2.7463	2.55176	5.35943	2.22121
Oribatida	HF4	Litter | Soil	-30.762	0.250091	-25.3716	46.8652	2.76177	8.34851	5.39038	2.51168
Oribatida	BJ4	Litter | Soil	-31.4008	-1.65358	-27.3132	67.1387	2.76182	5.88838	4.0876	4.41539
Oribatida	BF1	Litter | Soil	-28.7176	0.468591	-26.9919	59.1085	2.76515	10.6409	1.72562	2.29656
Oribatida	BJ3	Litter | Soil	-31.0231	-2.16658	-29.8891	32.8203	2.79072	5.88397	1.13404	4.9573
Oribatida	HO3	Litter | Soil	-28.8398	1.00176	-29.043	20.0692	2.79368	1.32454	-0.203279	1.79193
Oribatida	BF2	Litter | Soil	-31.8087	0.0184242	-28.0491	29.6289	2.795	4.37077	3.75961	2.77657
Oribatida	BF1	Litter | Soil	-28.7176	0.468591	-25.8784		2.79533		2.83911	2.32674
Oribatida	HR1	Litter | Soil	-28.8028	-0.405242	-20.8903		2.80053		7.91253	3.20577
Oribatida	BR2	Litter | Soil	-29.7129	-2.01758	-26.4249	43.8712	2.8026	7.1694	3.28804	4.82018
Oribatida	BF3	Litter | Soil	-31.6749	0.525091	-28.377	63.344	2.8065	10.8601	3.29789	2.28141
Oribatida	BJ2	Litter | Soil	-29.8831	-2.73158	-30.0665	21.0436	2.81866	2.5217	-0.183361	5.55024
Oribatida	HR1	Litter | Soil	-28.8028	-0.405242	-27.137	32.7093	2.82582	3.10843	1.66578	3.23106
Oribatida	BJ4	Litter | Soil	-31.4008	-1.65358	-26.8465	70.8824	2.8286	11.082	4.55428	4.48218
Oribatida	HO1	Litter | Soil	-29.5853	1.63176	-24.8337	41.9177	2.83001	3.26415	4.75169	1.19826
Oribatida	BJ2	Litter | Soil	-29.8831	-2.73158	-26.8233		2.8461	0.300699	3.05982	5.57768
Oribatida	HJ3	Litter | Soil	-29.7035	-0.470576	-26.2886	62.0241	2.84933	9.4178	3.41486	3.31991
Oribatida	BJ2	Litter | Soil	-29.8831	-2.73158	-29.3641	46.3182	2.85028	7.31382	0.518974	5.58185
Oribatida	HJ4	Litter | Soil	-30.1164	0.158591	-25.997	41.0124	2.85333	9.75197	4.11941	2.69474
Oribatida	HJ1	Litter | Soil	-30.1164	0.158591	-26.2202	47.4904	2.86518	8.63805	3.89626	2.70659
Oribatida	BF4	Litter | Soil	-31.2934	-0.665576	-26.5687	53.5662	2.87283	9.92443	4.72464	3.53841
Oribatida	BJ5	Litter | Soil	-32.4539	-1.26141	-25.795		2.87974		6.65886	4.14115
Oribatida	HR3	Litter | Soil	-29.254	1.92009	-24.8563		2.88261		4.39772	0.962524
Oribatida	BR4	Litter | Soil	-29.5615	-0.665242	-25.5139	26.7993	2.88371	4.37396	4.04765	3.54896
Oribatida	BR4	Litter | Soil	-29.5615	-0.665242	-28.1594	49.6432	2.88371	11.5919	1.4021	3.54896
Oribatida	BR2	Litter | Soil	-29.7129	-2.01758	-30.5817	50.5569	2.88971	10.4576	-0.868763	4.90729
Oribatida	BF3	Litter | Soil	-31.6749	0.525091	-25.6607	76.0091	2.89573	10.7251	6.01421	2.37064
Oribatida	BF2	Litter | Soil	-31.8087	0.0184242	-26.1103		2.91652	16.3936	5.6984	2.8981
Oribatida	BR1	Litter | Soil	-29.7619	-1.91558	-27.0934	64.5876	2.91676	5.49077	2.66853	4.83234
Oribatida	HF1	Litter	-30.7821	0.202091	-27.3669	33.1694	2.94093	6.89951	3.41522	2.73884
Oribatida	BF2	Litter | Soil	-31.8087	0.0184242	-27.5523	48.4717	2.94883	10.8569	4.25634	2.93041
Oribatida	HJ3	Litter | Soil	-29.7035	-0.470576	-26.9711		2.99283	16.3775	2.73239	3.46341
Oribatida	BJ2	Litter | Soil	-29.8831	-2.73158	-27.0967	28.9494	3.02478	4.63448	2.78637	5.75635
Oribatida	HR2	Litter	-29.6179	-1.35591	-26.1857		3.04182		3.43225	4.39773
Oribatida	BF1	Litter | Soil	-28.7176	0.468591	-27.2234	37.6562	3.04783	6.4492	1.49419	2.57924
Oribatida	BF2	Litter | Soil	-31.8087	0.0184242	-28.866	30.6813	3.05944	2.85922	2.94272	3.04102
Oribatida	HO1	Litter | Soil	-29.5853	1.63176	-27.577	31.271	3.07186	1.9491	2.0083	1.4401
Oribatida	BF1	Litter | Soil	-28.7176	0.468591	-25.7937	44.7757	3.0844	7.99891	2.92385	2.61581
Oribatida	HF1	Litter | Soil	-30.8093	0.201758	-28.7921		3.08853		2.01717	2.88678
Oribatida	HJ1	Litter | Soil	-30.1164	0.158591	-26.5944	57.2736	3.08983	8.5253	3.522	2.93124
Oribatida	BR3	Litter | Soil	-30.014	-1.54624	-29.5031	32.6653	3.13217	3.88868	0.510927	4.67841
Oribatida	BF1	Litter | Soil	-28.7176	0.468591	-27.6444	53.1389	3.13366	6.50394	1.07318	2.66507
Oribatida	BO4	Litter | Soil	-32.141	-0.193909	-27.8868	44.4644	3.13871	6.83969	4.25421	3.33262
Oribatida	BF1	Litter | Soil	-28.7176	0.468591	-28.444	14.6724	3.14097	2.47932	0.273577	2.67238
Oribatida	HF4	Litter | Soil	-30.762	0.250091	-26.1385	23.8032	3.15474	1.42231	4.62351	2.90465
Oribatida	HJ4	Litter | Soil	-30.2614	-0.965242	-28.3884	24.4203	3.15716	1.95973	1.87306	4.1224
Oribatida	BO3	Litter | Soil	-30.2376	0.842424	-30.2909	67.3532	3.1627	11.7446	-0.0533008	2.32027
Oribatida	HF2	Litter | Soil	-31.2236	0.0320909	-26.1479	52.8516	3.18392	5.84785	5.07566	3.15183
Oribatida	BF3	Litter | Soil	-31.6749	0.525091	-26.8193	61.0573	3.18882	4.56092	4.85558	2.66373
Oribatida	BO5	Litter | Soil	-29.8942	1.27309	-29.2744	18.3593	3.19822	2.01455	0.619736	1.92513
Oribatida	BF4	Litter | Soil	-31.2934	-0.665576	-26.3455		3.20043		4.94784	3.86601
Oribatida	HF3	Litter | Soil	-31.048	0.290091	-25.5238	37.7187	3.20396	5.23615	5.52423	2.91387
Oribatida	HR1	Litter | Soil	-28.8028	-0.405242	-25.8047	19.7004	3.21908	1.57326	2.99817	3.62432
Oribatida	HF3	Litter | Soil	-30.8093	0.201758	-26.5005		3.24674		4.3088	3.04498
Oribatida	BJ4	Litter | Soil	-31.4008	-1.65358	-24.9694	55.4246	3.24774	8.95356	6.43144	4.90131
Oribatida	HO4	Litter | Soil	-30.2671	-0.224242	-28.5442	38.6142	3.24946	6.38445	1.72291	3.47371
Oribatida	BJ3	Litter | Soil	-31.0231	-2.16658	-26.4658	34.6574	3.25074	5.9983	4.55739	5.41731
Oribatida	BJ5	Litter | Soil	-32.4539	-1.26141	-24.6307	62.0026	3.25874	8.88041	7.82323	4.52015
Oribatida	BF1	Litter | Soil	-28.7176	0.468591	-27.0514	48.0624	3.27183	6.43436	1.66611	2.80324
Oribatida	BF2	Litter | Soil	-31.8087	0.0184242	-24.8496	48.7326	3.27627	8.53322	6.95911	3.25785
Oribatida	BJ3	Litter | Soil	-31.0231	-2.16658	-25.2598		3.27959		5.76338	5.44617
Oribatida	BJ4	Litter | Soil	-31.4008	-1.65358	-25.3211		3.28074		6.07974	4.93431
Oribatida	HR1	Litter | Soil	-28.8028	-0.405242	-28.6834	14.3845	3.28531	1.61589	0.119414	3.69055
Oribatida	BR2	Litter | Soil	-29.7129	-2.01758	-28.1219	74.1556	3.28582	3.20779	1.59103	5.30339
Oribatida	HF1	Litter | Soil	-30.8093	0.201758	-27.5883	36.2957	3.3116	4.6095	3.22104	3.10984
Oribatida	BF4	Litter	-32.0349	-0.703909	-26.8795	27.568	3.32393	5.16319	5.15549	4.02784
Oribatida	BF4	Litter | Soil	-31.2934	-0.665576	-27.9923	57.1025	3.32436	9.02902	3.3011	3.98993
Oribatida	BF2	Litter | Soil	-31.8087	0.0184242	-27.9063	48.4508	3.32883	11.311	3.90242	3.31041
Oribatida	HJ4	Litter | Soil	-30.2614	-0.965242	-28.2951		3.33136	20.14	1.96636	4.2966
Oribatida	BF2	Litter | Soil	-31.8087	0.0184242	-24.2699	77.3522	3.33443	13.2739	7.53882	3.31601
Oribatida	HR1	Litter | Soil	-28.8028	-0.405242	-26.7137		3.33982	10.9008	2.0891	3.74506
Oribatida	HR3	Litter | Soil	-29.254	1.92009	-26.4566	55.2255	3.37062	7.07795	2.79737	1.45053
Oribatida	HR1	Litter | Soil	-28.8028	-0.405242	-24.7368	45.6502	3.38968	8.9547	4.06607	3.79493
Oribatida	BF2	Litter | Soil	-31.8087	0.0184242	-26.847	47.1289	3.39026	5.15288	4.96165	3.37183
Oribatida	BJ3	Litter | Soil	-31.0231	-2.16658	-30.4989		3.40119		0.524234	5.56777
Oribatida	BF1	Litter | Soil	-28.7176	0.468591	-27.8413	37.7838	3.41805	3.68661	0.876302	2.94946
Oribatida	HO1	Litter | Soil	-29.5853	1.63176	-25.98	72.1267	3.4356	11.8002	3.60532	1.80384
Oribatida	HR1	Litter | Soil	-28.8028	-0.405242	-27.5727	26.9499	3.45671	3.71735	1.23014	3.86196
Oribatida	HR2	Litter | Soil	-29.2976	-1.29024	-26.9344	41.9415	3.47571	7.16653	2.36324	4.76596
Oribatida	BO3	Litter | Soil	-30.2376	0.842424	-28.9471	48.0467	3.48524	8.50273	1.29052	2.64282
Oribatida	HF3	Litter | Soil	-31.048	0.290091	-28.3597	21.0512	3.51196	1.40191	2.68824	3.22187
Oribatida	BF3	Litter | Soil	-31.6749	0.525091	-30.4402		3.52237		1.23471	2.99728
Oribatida	HJ4	Litter | Soil	-30.2614	-0.965242	-25.6985	71.8992	3.52611	11.3368	4.56297	4.49135
Oribatida	HJ2	Soil	-30.9372	1.15409	-27.5721	20.8509	3.56767	2.89789	3.36511	2.41358
Oribatida	BF3	Litter | Soil	-31.6749	0.525091	-27.0011	52.25	3.57083	6.87633	4.67377	3.04574
Oribatida	BO5	Litter | Soil	-29.8942	1.27309	-29.4139	40.8983	3.57128	4.66794	0.480291	2.29819
Oribatida	HF4	Litter | Soil	-30.762	0.250091	-27.7876	32.0728	3.57631	5.97304	2.97441	3.32622
Oribatida	BO5	Litter | Soil	-29.8942	1.27309	-27.2643	20.8149	3.58565	1.9434	2.62992	2.31256
Oribatida	HJ4	Litter | Soil	-30.2614	-0.965242	-27.2436	32.7495	3.59383		3.01788	4.55908
Oribatida	BJ2	Litter | Soil	-29.8831	-2.73158	-27.6932	20.721	3.59702	1.6692	2.18991	6.3286
Oribatida	HJ3	Litter | Soil	-29.7035	-0.470576	-25.9018		3.61589	19.1748	3.8017	4.08646
Oribatida	HR1	Litter | Soil	-28.8028	-0.405242	-28.5392	27.7077	3.62227	0.779438	0.263654	4.02752
Oribatida	HF4	Litter | Soil	-30.762	0.250091	-26.5848	17.259	3.6317	2.34893	4.17713	3.38161
Oribatida	BF3	Litter | Soil	-31.6749	0.525091	-25.1174		3.65648		6.55752	3.13139
Oribatida	BF1	Litter | Soil	-28.7176	0.468591	-26.4628	34.9634	3.66533	3.1844	2.25476	3.19674
Oribatida	HJ4	Litter | Soil	-30.2614	-0.965242	-28.0631		3.68189		2.19837	4.64713
Oribatida	HF1	Litter | Soil	-30.8093	0.201758	-26.7977	53.9336	3.68674	11.0252	4.01159	3.48498
Oribatida	BF4	Litter | Soil	-31.2934	-0.665576	-25.1378	40.1219	3.69583	2.05505	6.15557	4.36141
Oribatida	BJ5	Litter | Soil	-32.4539	-1.26141	-24.742	83.6602	3.69974	3.3137	7.71194	4.96115
Oribatida	BO4	Litter | Soil	-32.141	-0.193909	-28.9644	30.795	3.71032	2.01804	3.17661	3.90423
Oribatida	BO4	Litter | Soil	-32.141	-0.193909	-26.682	44.9786	3.71668	6.76948	5.45906	3.91059
Oribatida	HJ1	Litter | Soil	-30.1164	0.158591	-26.1192	42.2143	3.73355	5.07535	3.99724	3.57496
Oribatida	HR1	Litter | Soil	-28.8028	-0.405242	-28.4782	32.7955	3.74432	0.930871	0.324652	4.14957
Oribatida	HJ4	Litter | Soil	-30.2614	-0.965242	-25.9008		3.78775	17.2499	4.36065	4.75299
Oribatida	BJ4	Litter | Soil	-31.4008	-1.65358	-25.7512		3.79171		5.64958	5.44529
Oribatida	BJ3	Litter | Soil	-31.0231	-2.16658	-26.2022	26.5725	3.82692	3.62241	4.82094	5.99349
Oribatida	BJ3	Litter | Soil	-31.0231	-2.16658	-27.0412		3.84171		3.98197	6.00829
Oribatida	BO3	Litter | Soil	-30.2376	0.842424	-26.2253	41.5538	3.8556	7.70706	4.01227	3.01318
Oribatida	HJ2	Litter | Soil	-30.8039	0.673424	-27.1044	34.0683	3.86183	5.73339	3.69951	3.18841
Oribatida	HJ3	Litter | Soil	-29.7035	-0.470576	-26.7323	40.4474	3.88626	5.17334	2.97117	4.35683
Oribatida	BR4	Litter | Soil	-29.5615	-0.665242	-23.3003	33.9294	3.90357	5.31988	6.26119	4.56881
Oribatida	BR1	Litter | Soil	-29.7619	-1.91558	-27.4475	60.2665	3.9066	10.5885	2.31437	5.82218
Oribatida	HJ1	Litter | Soil	-30.1164	0.158591	-25.4908		3.91404		4.62561	3.75545
Oribatida	BJ3	Litter | Soil	-31.0231	-2.16658	-25.6962		3.92371	11.814	5.32697	6.09029
Oribatida	BO3	Litter | Soil	-30.2376	0.842424	-29.0063	34.1122	3.92755	1.63875	1.23126	3.08513
Oribatida	BF4	Litter | Soil	-31.2934	-0.665576	-27.0536	43.5465	3.93183	9.47625	4.23982	4.59741
Oribatida	BF4	Litter | Soil	-31.2934	-0.665576	-26.9441	70.7408	3.94483	8.19625	4.34925	4.61041
Oribatida	HF3	Litter | Soil	-31.048	0.290091	-26.6679	24.9127	3.94674	3.58142	4.3801	3.65665
Oribatida	BJ4	Litter | Soil	-31.4008	-1.65358	-25.6888	71.9932	3.95974	13.0002	5.71197	5.61331
Oribatida	HO3	Litter | Soil	-28.8398	1.00176	-26.4419	40.9492	3.96846	8.11973	2.39781	2.9667
Oribatida	HF1	Litter | Soil	-30.8093	0.201758	-27.2713	88.9226	3.97774	11.1481	3.53803	3.77598
Oribatida	HO3	Litter | Soil	-28.8398	1.00176	-27.8954	40.4907	3.98055	7.86235	0.944302	2.97879
Oribatida	HR4	Litter | Soil	-28.8268	1.06809	-25.4378	19.5657	3.98291	2.99053	3.38905	2.91482
Oribatida	BF2	Litter | Soil	-31.8087	0.0184242	-27.5807	49.4014	3.98955	8.82274	4.22801	3.97113
Oribatida	HF4	Litter | Soil	-30.762	0.250091	-25.6004		3.99774		5.16155	3.74765
Oribatida	BF4	Litter | Soil	-31.2934	-0.665576	-29.3031	43.8229	4.00683	8.47482	1.99025	4.67241
Oribatida	BF1	Litter | Soil	-28.7176	0.468591	-27.0798	46.4352	4.01435	5.412	1.63775	3.54576
Oribatida	HR1	Litter | Soil	-28.8028	-0.405242	-23.4396	36.7168	4.01561	5.01787	5.3632	4.42085
Oribatida	BF3	Litter | Soil	-31.6749	0.525091	-23.8218		4.02262		7.85314	3.49753
Oribatida	BR1	Litter | Soil	-29.7619	-1.91558	-27.6347	45.089	4.07271	10.5403	2.12725	5.98829
Oribatida	BJ3	Litter | Soil	-31.0231	-2.16658	-25.2446	56.5409	4.07374	8.74508	5.77851	6.24031
Oribatida	BJ2	Litter | Soil	-29.8831	-2.73158	-26.6242	47.3127	4.07574	10.765	3.25889	6.80731
Oribatida	BF4	Litter | Soil	-31.2934	-0.665576	-27.9901	54.6868	4.11309	8.1692	3.30325	4.77866
Oribatida	HF3	Litter | Soil	-31.048	0.290091	-26.5659	53.5723	4.12574	7.10391	4.48208	3.83565
Oribatida	HO1	Litter	-28.4487	1.97209	-28.478	19.5574	4.15567	2.9313	-0.0293181	2.18358
Oribatida	HF1	Litter | Soil	-30.8093	0.201758	-27.1623		4.15874	14.3813	3.64701	3.95698
Oribatida	BF1	Litter | Soil	-28.7176	0.468591	-26.5505	36.6658	4.19383	5.65362	2.16702	3.72524
Oribatida	BF3	Litter | Soil	-31.6749	0.525091	-26.5987	49.7268	4.19582	3.16047	5.07616	3.67073
Oribatida	BO3	Litter | Soil	-30.2376	0.842424	-26.8071		4.21444	18.3907	3.43047	3.37202
Oribatida	HF1	Litter | Soil	-30.8093	0.201758	-28.4022	59.3684	4.22413	10.818	2.40713	4.02237
Oribatida	HO3	Litter | Soil	-28.8398	1.00176	-25.8652	42.4927	4.24671	5.04208	2.97453	3.24496
Oribatida	BO2	Litter | Soil	-29.5887	0.292091	-29.1	37.8594	4.2679	5.79105	0.488677	3.97581
Oribatida	BO3	Litter | Soil	-30.2376	0.842424	-28.7091	43.9497	4.2696	7.25148	1.52847	3.42718
Oribatida	BO4	Litter	-33.2153	-1.10491	-28.551	21.8047	4.27493	3.59796	4.6643	5.37984
Oribatida	BO5	Litter | Soil	-29.8942	1.27309	-25.7797	28.3259	4.27971	1.80558	4.11452	3.00662
Oribatida	HF4	Litter | Soil	-30.762	0.250091	-29.024		4.28293	21.0256	1.73796	4.03284
Oribatida	HO1	Litter | Soil	-29.5853	1.63176	-26.9097	69.5466	4.28371	11.2341	2.67566	2.65196
Oribatida	HO2	Litter | Soil	-28.9606	0.531424	-27.2252		4.31299	16.1897	1.73541	3.78157
Oribatida	BO3	Litter | Soil	-30.2376	0.842424	-31.9465	24.1839	4.33071	4.15492	-1.70889	3.48829
Oribatida	BJ4	Litter | Soil	-31.4008	-1.65358	-27.7803		4.33575		3.62048	5.98933
Oribatida	HO2	Litter | Soil	-28.9606	0.531424	-25.5481		4.33745	10.5824	3.41248	3.80603
Oribatida	BF1	Litter | Soil	-28.7176	0.468591	-28.1551	28.8975	4.36252	4.38085	0.562439	3.89392
Oribatida	BR1	Litter | Soil	-29.7619	-1.91558	-21.5537	35.0567	4.36557	6.52849	8.20823	6.28115
Oribatida	HJ1	Litter	-30.3027	0.428091	-26.9526	27.5345	4.381	4.86426	3.35018	3.95291
Oribatida	HO4	Litter | Soil	-30.2671	-0.224242	-28.4498	33.2958	4.38346	6.54048	1.81736	4.6077
Oribatida	BF4	Litter | Soil	-31.2934	-0.665576	-27.4224	69.7653	4.41582	5.62073	3.87094	5.08139
Oribatida	HJ3	Litter | Soil	-29.7035	-0.470576	-26.7275		4.42983	12.2046	2.97605	4.90041
Oribatida	BF2	Litter | Soil	-31.8087	0.0184242	-26.5856	53.8527	4.44089	8.19678	5.22312	4.42247
Oribatida	BJ3	Litter | Soil	-31.0231	-2.16658	-26.1122	57.5054	4.44097	7.81787	4.91091	6.60754
Oribatida	HO1	Litter | Soil	-29.5853	1.63176	-26.9319	24.9435	4.44289	2.07527	2.65344	2.81113
Oribatida	BF2	Litter | Soil	-31.8087	0.0184242	-27.6193	42.3913	4.46083	8.76702	4.18934	4.44241
Oribatida	BO5	Litter | Soil	-29.8942	1.27309	-29.0339	47.116	4.50662	2.70249	0.860288	3.23353
Oribatida	BR2	Litter | Soil	-29.7129	-2.01758	-25.9382	54.8371	4.51576	7.27923	3.77475	6.53334
Oribatida	HR1	Litter | Soil	-28.8028	-0.405242	-27.8517		4.51744		0.951091	4.92268
Oribatida	BO3	Litter | Soil	-30.2376	0.842424	-28.9708	45.7665	4.5293	2.23842	1.26683	3.68687
Oribatida	BF1	Litter | Soil	-28.7176	0.468591	-27.9695		4.53065	10.6828	0.748086	4.06206
Oribatida	HO1	Litter | Soil	-29.5853	1.63176	-27.7033	30.9166	4.53076	2.94054	1.88199	2.899
Oribatida	BJ3	Litter | Soil	-31.0231	-2.16658	-24.2238	47.0036	4.54116	10.6483	6.79934	6.70774
Oribatida	BF4	Litter | Soil	-31.2934	-0.665576	-27.2839	48.6631	4.57183	11.4178	4.00944	5.23741
Oribatida	BO3	Litter | Soil	-30.2376	0.842424	-28.1345	40.1915	4.58231	6.63182	2.10309	3.73989
Oribatida	BO5	Litter | Soil	-29.8942	1.27309	-29.9446	34.0723	4.61012	3.8464	-0.0504393	3.33703
Oribatida	BJ3	Litter | Soil	-31.0231	-2.16658	-25.7553		4.61574		5.26783	6.78231
Oribatida	BF2	Litter | Soil	-31.8087	0.0184242	-26.5518	76.8701	4.61583	11.5	5.25687	4.59741
Oribatida	BR2	Litter | Soil	-29.7129	-2.01758	-25.2889		4.62952	15.3141	4.42404	6.6471
Oribatida	BF3	Litter | Soil	-31.6749	0.525091	-26.4439	46.7773	4.64483	5.45782	5.23103	4.11974
Oribatida	HR1	Litter | Soil	-28.8028	-0.405242	-36.0254	23.5049	4.64691	4.6762	-7.22256	5.05215
Oribatida	HO2	Litter	-30.4629	0.0450909	-27.9332	18.1786	4.65267	1.90327	2.52969	4.60758
Oribatida	HR3	Litter	-30.064	1.53209	-26.2885		4.65582		3.7756	3.12373
Oribatida	BF4	Litter | Soil	-31.2934	-0.665576	-27.3652	53.8912	4.6645	6.94382	3.92816	5.33007
Oribatida	HR2	Litter | Soil	-29.2976	-1.29024	-27.3463	45.516	4.67971	9.72657	1.9513	5.96996
Oribatida	BO2	Litter	-30.1688	-0.0129091	-28.3261	19.2509	4.68167	2.27105	1.84267	4.69458
Oribatida	HJ3	Litter	-29.8546	-0.187909	-26.6726	22.6784	4.71867	3.82343	3.18199	4.90658
Oribatida	BO3	Litter | Soil	-30.2376	0.842424	-27.3075	59.7559	4.7246	9.23042	2.93007	3.88218
Oribatida	BO3	Litter | Soil	-30.2376	0.842424	-26.8059		4.75177		3.43174	3.90935
Oribatida	HR1	Litter | Soil	-28.8028	-0.405242	-25.4807	29.88	4.75443	3.97987	3.3221	5.15967
Oribatida	BJ2	Litter | Soil	-29.8831	-2.73158	-26.018	89.9452	4.75759	9.95167	3.86506	7.48917
Oribatida	HF3	Soil	-30.8969	0.644091	-26.751	24.4852	4.803	2.9124	4.14597	4.15891
Oribatida	BO5	Litter | Soil	-29.8942	1.27309	-26.0297	46.7892	4.81663	7.00833	3.8645	3.54354
Oribatida	HJ4	Litter | Soil	-30.2614	-0.965242	-28.1777	27.0551	4.82053	2.34682	2.08371	5.78578
Oribatida	HR4	Soil	-29.6384	0.265758	-25.9153		4.82182		3.72309	4.55606
Oribatida	BF2	Litter | Soil	-31.8087	0.0184242	-28.6471	66.5693	4.82651	9.5666	3.16154	4.80808
Oribatida	BO5	Litter | Soil	-29.8942	1.27309	-31.7344	27.8374	4.8421	0.524077	-1.84017	3.56901
Oribatida	BF4	Litter | Soil	-31.2934	-0.665576	-25.9365		4.86817	21.6542	5.35687	5.53375
Oribatida	BF2	Litter | Soil	-31.8087	0.0184242	-24.5275	69.434	4.88534	9.47399	7.28117	4.86691
Oribatida	HO4	Litter | Soil	-30.2671	-0.224242	-27.3528	42.0809	4.88971	6.02658	2.91434	5.11396
Oribatida	HJ1	Litter | Soil	-30.1164	0.158591	-25.5232	46.9543	4.89274	10.4988	4.59322	4.73415
Oribatida	HR1	Litter | Soil	-28.8028	-0.405242	-32.5778		4.90057	0.35664	-3.77494	5.30581
Oribatida	BR4	Litter | Soil	-29.5615	-0.665242	-29.8039	50.1319	4.98571	11.2476	-0.242351	5.65096
Oribatida	HF1	Litter | Soil	-30.8093	0.201758	-26.8096		4.99248		3.99971	4.79072
Oribatida	HR4	Litter | Soil	-28.8268	1.06809	-24.4574	59.6297	4.99257	9.15376	4.36939	3.92448
Oribatida	HR1	Litter | Soil	-28.8028	-0.405242	-26.5469	39.9619	5.04804	2.32446	2.25588	5.45329
Oribatida	BR1	Litter | Soil	-29.7619	-1.91558	-26.0258	48.5433	5.0496	8.44101	3.73608	6.96518
Oribatida	HR2	Litter | Soil	-29.2976	-1.29024	-25.0981	87.5397	5.0676	13.8386	4.19951	6.35784
Oribatida	BJ3	Litter | Soil	-31.0231	-2.16658	-25.6292	38.0681	5.09371	6.20727	5.39392	7.26029
Oribatida	BJ2	Litter | Soil	-29.8831	-2.73158	-27.3882	26.2551	5.09387	3.64107	2.49492	7.82545
Oribatida	BF4	Litter | Soil	-31.2934	-0.665576	-26.1618	46.3825	5.09516	4.7768	5.13157	5.76073
Oribatida	BO3	Litter | Soil	-30.2376	0.842424	-23.047	26.776	5.09982	3.04062	7.19061	4.25739
Oribatida	BF4	Litter | Soil	-31.2934	-0.665576	-28.6911	44.5	5.1135	6.94382	2.6023	5.77907
Oribatida	BO2	Litter | Soil	-29.5887	0.292091	-27.8255	35.4184	5.14671	4.35936	1.7632	4.85462
Oribatida	HF1	Litter | Soil	-30.8093	0.201758	-28.5739	33.9846	5.16404	6.13032	2.23543	4.96228
Oribatida	HJ4	Litter | Soil	-30.2614	-0.965242	-26.4743	74.6085	5.20081	9.46096	3.78713	6.16606
Oribatida	BF3	Litter | Soil	-31.6749	0.525091	-26.5266	47.9328	5.21183	8.72367	5.1483	4.68674
Oribatida	HF3	Litter | Soil	-31.048	0.290091	-28.4659	61.9597	5.22644	9.13425	2.58212	4.93635
Oribatida	BF2	Litter | Soil	-31.8087	0.0184242	-30.6014	33.6213	5.23824	0.401212	1.20724	5.21981
Oribatida	BR1	Litter | Soil	-29.7619	-1.91558	-26.2177		5.25026	20.5402	3.54424	7.16584
Oribatida	HR2	Litter | Soil	-29.2976	-1.29024	-26.171	74.4314	5.26906	15.3436	3.12661	6.5593
Oribatida	BF2	Litter | Soil	-31.8087	0.0184242	-26.0767	88.173	5.33933	12.7813	5.73196	5.32091
Oribatida	HO1	Litter | Soil	-29.5853	1.63176	-28.2432	47.1292	5.35641	10.4635	1.34219	3.72465
Oribatida	BO2	Litter | Soil	-29.5887	0.292091	-26.346		5.38867		3.24268	5.09658
Oribatida	BF4	Litter | Soil	-31.2934	-0.665576	-26.6292	50.0587	5.39383	2.55759	4.66422	6.05941
Oribatida	BF1	Litter | Soil	-28.7176	0.468591	-26.3536		5.45181		2.36399	4.98322
Oribatida	HO3	Litter | Soil	-28.8398	1.00176	-27.8987	44.4578	5.45182	9.51862	0.941088	4.45006
Oribatida	BF1	Litter | Soil	-28.7176	0.468591	-27.1726	45.5986	5.4574	5.47471	1.54498	4.98881
Oribatida	HO3	Litter	-29.6632	1.07709	-28.7913	14.223	5.46067	1.36786	0.871955	4.38358
Oribatida	BO3	Litter | Soil	-30.2376	0.842424	-26.9616	43.5502	5.4736	8.58218	3.27598	4.63118
Oribatida	BF4	Litter | Soil	-31.2934	-0.665576	-25.7561	75.1464	5.47896	11.0165	5.5373	6.14454
Oribatida	BF2	Litter | Soil	-31.8087	0.0184242	-26.9306		5.4847	13.375	4.87809	5.46628
Oribatida	BF3	Litter | Soil	-31.6749	0.525091	-27.9066		5.50402	9.50488	3.76834	4.97893
Oribatida	BR2	Litter | Soil	-29.7129	-2.01758	-33.6319		5.53671	19.706	-3.91897	7.55429
Oribatida	BR1	Litter | Soil	-29.7619	-1.91558	-26.5537	47.9547	5.56095	6.5681	3.20826	7.47653
Oribatida	HR1	Litter | Soil	-28.8028	-0.405242	-30.0354	29.2079	5.58092	0.465095	-1.23253	5.98616
Oribatida	BF2	Litter | Soil	-31.8087	0.0184242	-26.4543		5.59976	13.0765	5.3544	5.58134
Oribatida	BF4	Litter | Soil	-31.2934	-0.665576	-30.5749	39.5455	5.62012	3.086	0.718437	6.28569
Oribatida	HR1	Litter | Soil	-28.8028	-0.405242	-30.4385	54.1388	5.63306	10.1397	-1.63564	6.0383
Oribatida	HF3	Litter | Soil	-31.048	0.290091	-26.2592	37.2592	5.6451	4.52658	4.7888	5.35501
Oribatida	HR3	Litter | Soil	-29.254	1.92009	-23.1354	73.3552	5.65357	10.1761	6.11856	3.73348
Oribatida	BF2	Litter | Soil	-31.8087	0.0184242	-26.1148	15.7161	5.67616	2.77304	5.6939	5.65774
Oribatida	BF3	Litter | Soil	-31.6749	0.525091	-26.8994	27.4491	5.69231	2.75683	4.77552	5.16722
Oribatida	BJ3	Litter | Soil	-31.0231	-2.16658	-25.4502	61.3883	5.70575	7.44385	5.57289	7.87233
Oribatida	HR2	Litter | Soil	-29.2976	-1.29024	-27.5004	16.2647	5.72313	1.11096	1.79722	7.01338
Oribatida	BJ4	Litter	-30.343	-1.50791	-28.8868	17.2077	5.73767	1.86465	1.45617	7.24558
Oribatida	HO1	Litter | Soil	-29.5853	1.63176	-28.2816	41.5554	5.74154	9.19912	1.30378	4.10978
Oribatida	BR2	Litter | Soil	-29.7129	-2.01758	-26.6639		5.7416	18.2984	3.049	7.75918
Oribatida	HR1	Litter | Soil	-28.8028	-0.405242	-25.1277		5.74313		3.67514	6.14837
Oribatida	BO4	Litter | Soil	-32.141	-0.193909	-28.0498	44.5178	5.76193	3.62193	4.09124	5.95584
Oribatida	BR2	Litter | Soil	-29.7129	-2.01758	-24.9349		5.78852		4.77799	7.8061
Oribatida	BF2	Litter | Soil	-31.8087	0.0184242	-26.529	57.9652	5.79283	4.75622	5.2797	5.77441
Oribatida	HO1	Litter | Soil	-29.5853	1.63176	-27.248	23.3168	5.80819	3.412	2.33738	4.17644
Oribatida	BJ3	Litter | Soil	-31.0231	-2.16658	-29.2439	21.0656	5.82191	1.9844	1.77923	7.98849
Oribatida	BJ2	Litter | Soil	-29.8831	-2.73158	-27.0141	36.927	5.83786	4.9376	2.86899	8.56943
Oribatida	HO2	Soil	-30.4629	0.0450909	-28.2273	28.0801	5.83967	3.24333	2.23551	5.79458
Oribatida	HR3	Litter | Soil	-29.254	1.92009	-25.6643		5.84468	10.509	3.58973	3.92459
Oribatida	BR3	Litter | Soil	-30.014	-1.54624	-25.9157	49.3367	5.85693	6.84675	4.09832	7.40317
Oribatida	HO3	Soil	-29.6632	1.07709	-27.2206	21.0138	5.89567	3.35394	2.44265	4.81858
Oribatida	BO5	Soil	-30.912	0.952091	-26.6797	26.2865	5.92093	5.0059	4.23236	4.96884
Oribatida	HF4	Litter | Soil	-30.762	0.250091	-27.8925		5.99979	8.71332	2.86951	5.7497
Oribatida	BF4	Litter | Soil	-31.2934	-0.665576	-26.5685		6.00869	24.1306	4.72488	6.67427
Oribatida	BR4	Litter | Soil	-29.5615	-0.665242	-28.3363	53.8281	6.0096	7.10865	1.2252	6.67484
Oribatida	BF4	Litter | Soil	-31.2934	-0.665576	-29.3341		6.04935		1.95924	6.71493
Oribatida	HJ4	Litter | Soil	-30.2614	-0.965242	-26.6084	59.7259	6.05983	8.16634	3.65306	7.02508
Oribatida	BF4	Litter | Soil	-31.2934	-0.665576	-31.2248		6.08658	10.4924	0.0686152	6.75216
Oribatida	BJ3	Litter	-29.9815	-2.48791	-28.9548	14.7256	6.09467	1.24292	1.02665	8.58258
Oribatida	BJ5	Soil	-30.9594	-2.12591	-28.8911	16.593	6.10767	1.2283	2.06826	8.23358
Oribatida	HJ1	Soil	-30.3027	0.428091	-26.8308	26.7244	6.108	4.76537	3.47198	5.67991
Oribatida	BR1	Litter | Soil	-29.7619	-1.91558	-25.6119	62.2974	6.1146	11.9208	4.15003	8.03018
Oribatida	BO5	Litter | Soil	-32.141	-0.193909	-26.5596		6.16071	20.2417	5.58139	6.35462
Oribatida	BJ3	Litter | Soil	-31.0231	-2.16658	-25.3677	45.1939	6.17205	8.10503	5.65548	8.33862
Oribatida	BO3	Litter | Soil	-30.2376	0.842424	-27.9804		6.20271	12.4358	2.25717	5.36029
Oribatida	BF4	Litter | Soil	-31.2934	-0.665576	-25.9775	59.5331	6.20382	5.97273	5.31586	6.86939
Oribatida	HF3	Litter | Soil	-31.048	0.290091	-24.7487	47.4285	6.21874	9.62445	6.29929	5.92865
Oribatida	HO1	Litter | Soil	-29.5853	1.63176	-25.8208		6.31559	0.167538	3.76451	4.68383
Oribatida	BJ2	Litter | Soil	-29.8831	-2.73158	-26.8881		6.31715		2.99506	9.04872
Oribatida	BO5	Litter | Soil	-29.8942	1.27309	-31.6186	28.0682	6.32999	0.621262	-1.72438	5.0569
Oribatida	BF1	Litter | Soil	-28.7176	0.468591	-25.9081		6.36183		2.80946	5.89324
Oribatida	BR1	Litter | Soil	-29.7619	-1.91558	-26.044		6.3826	16.7674	3.71792	8.29818
Oribatida	HR4	Litter | Soil	-28.8268	1.06809	-26.0763		6.40141		2.75052	5.33332
Oribatida	BR3	Litter | Soil	-30.014	-1.54624	-26.7944		6.46682		3.21961	8.01306
Oribatida	HR3	Litter | Soil	-29.254	1.92009	-30.9302	32.4141	6.4796	1.64369	-1.67623	4.55951
Oribatida	BR1	Litter | Soil	-29.7619	-1.91558	-26.393	70.361	6.5066	12.0013	3.36891	8.42218
Oribatida	BF4	Litter | Soil	-31.8087	0.0184242	-26.7706		6.56583		5.03805	6.54741
Oribatida	BO2	Litter | Soil	-29.5887	0.292091	-25.865	84.9322	6.5711		3.72369	6.27901
Oribatida	BR2	Litter | Soil	-29.7129	-2.01758	-25.9369	21.0689	6.6163	2.0733	3.77604	8.63388
Oribatida	BF4	Litter | Soil	-31.2934	-0.665576	-23.9135	14.6298	6.63103	1.55534	7.37991	7.29661
Oribatida	BF3	Soil	-32.1422	-0.687409	-28.666	12.8631	6.67767	0.895259	3.47625	7.36508
Oribatida	BF4	Litter | Soil	-31.2934	-0.665576	-26.3793	47.6672	6.75383	6.34163	4.91408	7.41941
Oribatida	HR3	Litter | Soil	-29.254	1.92009	-23.7333	44.0621	6.79071	10.7681	5.5207	4.87062
Oribatida	HF3	Litter | Soil	-31.048	0.290091	-24.8965	24.6659	6.81006	3.40105	6.15151	6.51996
Oribatida	BO5	Litter | Soil	-29.8942	1.27309	-27.6284	16.116	6.81799	2.82902	2.26579	5.5449
Oribatida	BR4	Litter | Soil	-29.5615	-0.665242	-27.7873	47.3446	6.8376	7.0384	1.77417	7.50284
Oribatida	BF2	Soil	-32.2495	-0.670909	-28.3612	14.4969	6.85767	1.30082	3.8883	7.52858
Oribatida	HR3	Litter | Soil	-29.254	1.92009	-29.6421	34.4725	6.8986	2.93152	-0.388142	4.97851
Oribatida	BF4	Soil	-32.0349	-0.703909	-29.0366	15.2963	6.90767	1.57291	2.99835	7.61158
Oribatida	HR1	Litter | Soil	-28.8028	-0.405242	-26.7972	37.8572	6.92261	4.60067	2.00562	7.32786
Oribatida	HO3	Litter | Soil	-28.8398	1.00176	-27.1508	41.2195	6.9306	6.1441	1.68899	5.92884
Oribatida	HO3	Litter | Soil	-28.8398	1.00176	-26.6681	45.0565	6.9606	6.16702	2.17161	5.95884
Oribatida	HO1	Litter | Soil	-29.5853	1.63176	-25.5681	19.9981	6.97381	2.07434	4.0172	5.34206
Oribatida	HF3	Litter | Soil	-31.048	0.290091	-27.8336	48.1541	7.01329	7.92407	3.21441	6.7232
Oribatida	HR4	Litter | Soil	-28.8268	1.06809	-26.7143	82.1191	7.0276	13.8386	2.11251	5.95951
Oribatida	HR2	Litter | Soil	-29.2976	-1.29024	-26.2265	69.0942	7.0356	12.541	3.07119	8.32584
Oribatida	HR1	Litter | Soil	-28.8028	-0.405242	-25.7943		7.03854		3.00857	7.44378
Oribatida	BO3	Litter | Soil	-30.2376	0.842424	-30.3476	40.4814	7.0775	7.34452	-0.109948	6.23508
Oribatida	HR3	Litter | Soil	-29.254	1.92009	-26.9978	52.9182	7.0806	7.25446	2.25619	5.16051
Oribatida	HR2	Litter | Soil	-29.2976	-1.29024	-27.7888	47.7248	7.0966	7.69474	1.50883	8.38684
Oribatida	BF4	Litter | Soil	-31.2934	-0.665576	-26.6249	48.2482	7.11883	7.68274	4.66845	7.78441
Oribatida	HR3	Litter | Soil	-29.254	1.92009	-26.5641	47.6742	7.1249	6.09991	2.6899	5.20481
Oribatida	HO1	Litter | Soil	-29.5853	1.63176	-26.3491	86.1406	7.12793	12.141	3.23629	5.49617
Oribatida	BF2	Litter | Soil	-31.8087	0.0184242	-27.774		7.15383		4.0347	7.13541
Oribatida	HR3	Litter | Soil	-29.254	1.92009	-25.9729		7.1716	18.7781	3.28113	5.25151
Oribatida	BF3	Litter | Soil	-31.6749	0.525091	-26.8079		7.18174	0.21455	4.86696	6.65665
Oribatida	BR1	Litter | Soil	-29.7619	-1.91558	-26.3889	58.7005	7.22852	8.5027	3.37303	9.14409
Oribatida	BR1	Litter | Soil	-29.7619	-1.91558	-29.1165	58.9156	7.24671	12.8332	0.645411	9.16229
Oribatida	BO3	Litter | Soil	-30.2376	0.842424	-25.8525	33.383	7.25994	5.47626	4.38514	6.41751
Oribatida	BR1	Litter | Soil	-29.7619	-1.91558	-25.9164		7.28475	9.39437	3.84557	9.20033
Oribatida	HR1	Litter | Soil	-28.8028	-0.405242	-25.6081	44.0606	7.39348	4.26926	3.1947	7.79872
Oribatida	HJ2	Litter | Soil	-30.8039	0.673424	-29.29		7.4741		1.51397	6.80068
Oribatida	BO4	Litter | Soil	-32.141	-0.193909	-31.7836	44.039	7.50871	8.51374	0.357387	7.70262
Oribatida	BJ3	Litter | Soil	-31.0231	-2.16658	-26.6139	50.3054	7.51147	7.82976	4.40928	9.67804
Oribatida	BR2	Litter | Soil	-29.7129	-2.01758	-26.7206	31.0405	7.5406	5.42066	2.99229	9.55818
Oribatida	HO4	Litter | Soil	-30.2671	-0.224242	-28.0532	60.0424	7.55371	10.6601	2.21397	7.77796
Oribatida	HR3	Litter | Soil	-29.254	1.92009	-27.5059	81.3104	7.64457	11.9682	1.74808	5.72448
Oribatida	BF2	Litter | Soil	-31.8087	0.0184242	-30.9025	27.1416	7.64877	2.63928	0.906188	7.63034
Oribatida	BJ4	Litter | Soil	-31.4008	-1.65358	-26.4416		7.71668	1.59238	4.95921	9.37025
Oribatida	BJ4	Litter | Soil	-31.4008	-1.65358	-31.5435	23.5191	7.73511	2.98725	-0.142659	9.38869
Oribatida	BF1	Litter | Soil	-28.7176	0.468591	-27.5111	31.9266	7.78691	5.17383	1.20646	7.31832
Oribatida	HR3	Litter | Soil	-29.254	1.92009	-24.161	77.3798	7.9796	12.9201	5.09305	6.05951
Oribatida	BR2	Litter | Soil	-29.7129	-2.01758	-25.6193	37.49	7.98871	5.01107	4.0936	10.0063
Oribatida	BR4	Litter | Soil	-29.5615	-0.665242	-28.1726	60.3372	8.0046	7.82363	1.38893	8.66984
Oribatida	HR1	Litter | Soil	-28.8028	-0.405242	-25.6524		8.06187	12.3401	3.1504	8.46711
Oribatida	BO3	Litter | Soil	-30.2376	0.842424	-29.0632	53.2337	8.2876	9.72885	1.17439	7.44518
Oribatida	BF1	Litter | Soil	-28.7176	0.468591	-26.6291		8.30057	11.5626	2.08846	7.83198
Oribatida	HR3	Soil	-30.064	1.53209	-21.4569		8.30882		8.6072	6.77673
Oribatida	BO3	Litter	-28.4809	0.876091	-28.4652	16.1881	8.35467	1.46202	0.0156531	7.47858
Oribatida	BO3	Litter | Soil	-30.2376	0.842424	-24.7379		8.39843	4.69718	5.49971	7.556
Oribatida	HJ1	Litter | Soil	-30.1164	0.158591	-28.5614		8.53865		1.55501	8.38006
Oribatida	HO3	Litter | Soil	-28.8398	1.00176	-25.5715	39.5828	8.5736	5.86982	3.26827	7.57184
Oribatida	HO3	Litter | Soil	-28.8398	1.00176	-27.0306		8.57529	21.8344	1.80914	7.57353
Oribatida	BJ3	Litter | Soil	-31.0231	-2.16658	-29.1159	20.3672	8.65299	1.95734	1.90723	10.8196
Oribatida	HJ2	Litter | Soil	-30.8039	0.673424	-26.6885		8.70483		4.11541	8.03141
Oribatida	BO4	Litter | Soil	-32.141	-0.193909	-26.3034	63.4844	8.73966	4.2819	5.83761	8.93357
Oribatida	BJ3	Litter | Soil	-31.0231	-2.16658	-29.7607	33.8129	8.76203	3.53584	1.2624	10.9286
Oribatida	HO2	Litter | Soil	-28.9606	0.531424	-25.3864	37.0401	8.77278	2.84396	3.5742	8.24136
Oribatida	BR1	Litter | Soil	-29.7619	-1.91558	-26.3184	52.0671	8.8756	3.97071	3.44357	10.7912
Oribatida	BF4	Litter | Soil	-31.2934	-0.665576	-25.9475	40.709	8.90983	7.03462	5.34584	9.57541
Oribatida	BO3	Litter | Soil	-30.2376	0.842424	-23.9218		8.9346	0.162887	6.31578	8.09217
Oribatida	BJ2	Litter | Soil	-29.8831	-2.73158	-25.3416	21.8063	8.93969	1.6312	4.54149	11.6713
Oribatida	BJ3	Soil	-29.9815	-2.48791	-28.5332	15.9835	9.11067	1.30674	1.44826	11.5986
Oribatida	HO3	Litter | Soil	-28.8398	1.00176	-26.5693	71.4567	9.1806	9.56072	2.27047	8.17884
Oribatida	HR4	Litter | Soil	-28.8268	1.06809	-24.8608	41.9692	9.18871	9.64116	3.96599	8.12062
Oribatida	BF1	Litter | Soil	-28.7176	0.468591	-24.7342	70.452	9.28783	2.01915	3.98335	8.81924
Oribatida	BF4	Litter | Soil	-31.2934	-0.665576	-25.8998	42.0635	9.87483	1.66019	5.39356	10.5404
Oribatida	BO5	Litter | Soil	-29.8942	1.27309	-29.8819	39.5532	9.92854	5.88946	0.0122572	8.65545
Oribatida	BO5	Litter | Soil	-29.8942	1.27309	-28.0499	30.1617	9.93368	2.91821	1.84428	8.66059
Oribatida	HO3	Litter | Soil	-28.8398	1.00176	-28.3623		9.9346	18.1076	0.47744	8.93284
Oribatida	HO3	Litter | Soil	-28.8398	1.00176	-23.3597		10.0083	0.871687	5.48009	9.00657
Oribatida	HR4	Litter | Soil	-28.8268	1.06809	-29.608		10.0372	9.30032	-0.781165	8.96912
Oribatida	HR3	Litter | Soil	-29.254	1.92009	-21.5893	28.7651	10.0728	3.21725	7.66473	8.1527
Oribatida	BR2	Litter | Soil	-29.7129	-2.01758	-27.8588	56.0917	10.2357	10.8521	1.85409	12.2533
Oribatida	BJ2	Litter | Soil	-29.8831	-2.73158	-26.252		10.2424	18.8863	3.63114	12.9739
Oribatida	BO3	Litter | Soil	-30.2376	0.842424	-27.3652	80.4917	10.3686	14.1832	2.87242	9.52618
Oribatida	BF2	Litter | Soil	-31.8087	0.0184242	-25.9473	47.3936	10.8708	2.10889	5.86136	10.8524
Oribatida	HR3	Litter | Soil	-29.254	1.92009	-30.1352	29.5081	11.0606	1.60481	-0.88124	9.14051
Oribatida	HR1	Litter | Soil	-28.8028	-0.405242	-25.4244	49.0437	11.3565	5.71684	3.37847	11.7617
Oribatida	HR4	Litter | Soil	-28.8268	1.06809	-29.6565	72.4661	11.7869	5.15288	-0.829676	10.7188
Oribatida	BO2	Litter | Soil	-29.5887	0.292091	-30.4702	36.2052	12.3129	2.62724	-0.881501	12.0208
Oribatida	HR3	Litter | Soil	-29.254	1.92009	-28.3964	47.2747	12.4586	5.0219	0.857641	10.5385
Oribatida	HR1	Litter | Soil	-28.8028	-0.405242	-25.6645		12.6496	0.23776	3.1383	13.0548
Oribatida	BF1	Litter | Soil	-28.7176	0.468591	-28.0595		12.6599		0.658061	12.1914
Oribatida	BF4	Litter | Soil	-31.2934	-0.665576	-24.4833	39.8812	12.7876	2.92141	6.81004	13.4532
Oribatida	BO5	Litter | Soil	-29.8942	1.27309	-29.3896	27.7972	13.5347	3.32219	0.504576	12.2616
Oribatida	BO2	Litter | Soil	-29.5887	0.292091	-26.5866	24.3974	13.5507	4.32862	3.00206	13.2586
Oribatida	BO5	Litter | Soil	-29.8942	1.27309	-26.7027	60.8076	13.8622	11.3247	3.1915	12.5891
Oribatida	HR4	Litter | Soil	-28.8268	1.06809	-28.1939		14.1397	11.6882	0.632922	13.0716
Oribatida	BF4	Litter | Soil	-31.2934	-0.665576	-30.4581	49.9354	14.5844	5.06104	0.83527	15.2499
Oribatida	HR4	Litter | Soil	-28.8268	1.06809	-25.1683	55.0478	15.167	7.42112	3.65851	14.0989
Oribatida	BF3	Litter | Soil	-31.6749	0.525091	-26.1568	48.3512	16.6338	1.7275	5.51813	16.1087
Oribatida	BR2	Soil	-29.9372	-2.09691	-27.673	24.71			2.26417
Oribatida	BR3	Soil	-29.5816	-1.50491	-27.9703	17.8226			1.61131
Oribatida	BR4	Litter	-30.062	-0.186909	-28.4397	17.0364			1.62229
Oribatida	HR1	Litter	-29.2332	0.621091	-27.228	16.6551			2.00519
Oribatida	BR4	Soil	-30.062	-0.186909	-22.6911	18.1716			7.37089
Oribatida	BR2	Litter	-29.9372	-2.09691	-28.513	18.2579			1.42413
Oribatida	BR1	Litter	-30.5444	-0.679909	-27.6772	18.0936			2.86721
Oribatida	HO4	Soil	-29.8435	0.147091	-29.0578				0.785663
Oribatida	HR1	Soil	-29.2332	0.621091	-27.0241	17.5003			2.20909
Oribatida	HO4	Litter	-29.8435	0.147091	-28.4005	18.6868			1.44304
Oribatida	BO4	Soil	-33.2153	-1.10491	-29.3839				3.8314
Oribatida	BR1	Soil	-30.5444	-0.679909	-27.7091	19.5154			2.83535
Oribatida	HF1	Soil	-30.7821	0.202091	-27.6655	18.0948			3.11656
Oribatida	BO5	Litter	-30.912	0.952091	-32.0697	19.6565			-1.15764
Oribatida	BO3	Soil	-28.4809	0.876091	-27.7579	20.0428			0.722945
Oribatida	BR3	Litter	-29.5816	-1.50491	-25.7168	21.2814			3.86487
Oribatida	HF3	Litter	-30.8969	0.644091	-27.5349	25.7598			3.362
Oribatida	HF2	Soil	-31.5546	-0.660909	-28.0596	24.1888			3.49501
Orthoptera	HJ3	Litter	-29.8546	-0.187909	-25.7477		-4.97829	8.34633	4.10684	-4.79039
Orthoptera	BJ5	Litter	-30.2418	-2.30516	-27.6226		-1.71065	14.6183	2.61916	0.594512
Orthoptera	BR4	Litter | Soil	-30.062	-0.186909	-28.4462	47.8346	1.52267	2.43336	1.6158	1.70958
Orthoptera	BO3	Litter	-28.4809	0.876091	-26.0161		2.19894		2.46482	1.32285
Orthoptera	BF3	Litter	-32.1422	-0.687409	-25.8848	36.2553	2.31167	8.34904	6.25742	2.99908
Orthoptera	BF4	Litter	-32.0349	-0.703909	-25.5288	24.5946	2.61767	5.92259	6.50617	3.32158
Orthoptera	BR3	Litter	-29.5816	-1.50491	-26.2288	61.8996	3.39367	3.28844	3.35287	4.89858
Pauropoda	HJ1	Litter	-30.3027	0.428091	-26.021		-7.93929		4.28173	-8.36739
Pauropoda	BJ3	Litter | Soil	-29.9815	-2.48791	-26.133		-7.21229		3.84844	-4.72439
Pauropoda	HF3	Litter | Soil	-30.8969	0.644091	-26.0932		-6.52529		4.80368	-7.16939
Pauropoda	HJ1	Soil	-30.3027	0.428091	-25.8818		-6.43729		4.42098	-6.86539
Pauropoda	HO2	Litter | Soil	-30.4629	0.0450909	-25.9331		-5.10629		4.52981	-5.15139
Pauropoda	HJ2	Litter	-30.9372	1.15409	-26.3121		-1.93129		4.62514	-3.08539
Pauropoda	BF2	Soil	-32.2495	-0.670909	-26.266		-1.75629		5.98346	-1.08539
Pauropoda	BF1	Litter	-32.1422	-0.687409	-26.3194		-0.138294		5.8228	0.549115
Pauropoda	BF3	Litter	-32.1422	-0.687409	-23.4604		0.845938		8.68177	1.53335
Pauropoda	BF2	Litter	-32.2495	-0.670909	-25.8291		2.59794		6.42036	3.26885
Pauropoda	BO2	Litter | Soil	-30.1688	-0.0129091	-25.9252		6.04794		4.24362	6.06085
Pauropoda	HR3	Litter | Soil	-30.064	1.53209	-26.6722		9.38971		3.39181	7.85761
Pauropoda	HO1	Litter | Soil	-28.4487	1.97209	-25.42				3.02864
Protura	BJ4	Litter	-30.343	-1.50791	-27.7344		-5.18959		2.60861	-3.68168
Protura	BF2	Litter | Soil	-32.2495	-0.670909	-27.2486		-2.98459		5.00083	-2.31368
Protura	BR4	Litter | Soil	-30.062	-0.186909	-27.4933		-1.20918		2.56877	-1.02227
Protura	BO2	Litter | Soil	-30.1688	-0.0129091	-27.3936		-0.673182		2.77524	-0.660273
Protura	BJ5	Litter | Soil	-30.9594	-2.12591	-27.9057		-0.295588		3.05369	1.83032
Protura	BF3	Litter	-32.1422	-0.687409	-27.7521		-0.0595882		4.39015	0.627821
Protura	HF1	Litter | Soil	-30.7821	0.202091	-27.558		0.397818		3.22408	0.195727
Protura	BJ3	Litter | Soil	-29.9815	-2.48791	-27.9918		1.56341		1.98964	4.05132
Protura	BF1	Litter	-32.1422	-0.687409	-27.2979		4.99193		4.84434	5.67934
Pseudoscorpionida	BJ4	Litter	-30.343	-1.50791	-26.8497	34.7106	5.92594	7.1395	3.49331	7.43385
Pseudoscorpionida	HO1	Litter	-28.4487	1.97209	-27.914		5.93971		0.534684	3.96761
Pseudoscorpionida	HF1	Litter	-30.7821	0.202091	-25.7356	44.1818	6.896	11.5816	5.04651	6.69391
Pseudoscorpionida	BJ4	Soil	-30.343	-1.50791	-26.1882	45.2457	6.899	11.5338	4.15486	8.40691
Pseudoscorpionida	BR3	Litter | Soil	-29.5816	-1.50491	-28.4207		6.93571		1.16092	8.44061
Pseudoscorpionida	HR2	Litter | Soil	-29.6179	-1.35591	-26.3499	36.4385	6.99	6.93031	3.26805	8.34591
Pseudoscorpionida	HJ1	Litter | Soil	-30.3027	0.428091	-25.6821	44.4363	7.006	9.00703	4.62068	6.57791
Pseudoscorpionida	BF4	Litter	-32.0349	-0.703909	-25.7076	48.8833	7.36635	12.4255	6.3273	8.07026
Pseudoscorpionida	HJ2	Soil	-30.9372	1.15409	-26.2753	44.5658	7.569	9.23463	4.6619	6.41491
Pseudoscorpionida	HF4	Soil	-30.5505	0.553091	-26.6911	55.1941	7.58	9.96089	3.85938	7.02691
Pseudoscorpionida	HF4	Litter	-30.5505	0.553091	-26.6313	42.2482	7.619	10.3502	3.91923	7.06591
Pseudoscorpionida	HJ2	Litter	-30.9372	1.15409	-25.8868	46.3772	7.656	8.86526	5.0504	6.50191
Pseudoscorpionida	BJ2	Litter | Soil	-29.6834	-3.09891	-25.9531		7.72494		3.73031	10.8238
Pseudoscorpionida	BO3	Litter | Soil	-28.4809	0.876091	-27.97	42.6065	7.986	9.75802	0.510885	7.10991
Pseudoscorpionida	BO5	Litter | Soil	-30.912	0.952091	-27.9621		8.20371		2.94989	7.25161
Pseudoscorpionida	HF1	Soil	-30.7821	0.202091	-25.9981	43.7383	8.301	11.159	4.78401	8.09891
Pseudoscorpionida	BF2	Litter	-32.2495	-0.670909	-26.4758	30.8331	8.35694	6.24462	5.7737	9.02785
Pseudoscorpionida	BF1	Litter	-32.1422	-0.687409	-25.545	44.0491	8.62894	11.5829	6.59718	9.31635
Pseudoscorpionida	HJ4	Litter | Soil	-29.8576	-1.15291	-27.1853		8.64171		2.67233	9.79461
Pseudoscorpionida	BF3	Litter	-32.1422	-0.687409	-25.7876	47.9721	8.78235	13.2684	6.35455	9.46976
Pseudoscorpionida	BJ3	Litter | Soil	-29.9815	-2.48791	-26.2805	45.4368	8.86594	11.5589	3.70095	11.3538
Pseudoscorpionida	BF1	Soil	-32.1422	-0.687409	-27.2505	33.1164	9.03394	6.9557	4.89169	9.72135
Pseudoscorpionida	HF3	Litter | Soil	-30.8969	0.644091	-26.2155	56.6316	9.088	10.4072	4.68147	8.44391
Pseudoscorpionida	BF2	Soil	-32.2495	-0.670909	-25.952	43.104	9.26694	10.61	6.29743	9.93785
Pseudoscorpionida	BF3	Soil	-32.1422	-0.687409	-26.1028	43.9901	9.41094	11.3515	6.03936	10.0983
Pseudoscorpionida	BJ5	Litter | Soil	-30.9594	-2.12591	-25.996	43.5114	9.443	11.3088	4.96336	11.5689
Pseudoscorpionida	BF4	Soil	-32.0349	-0.703909	-25.2126	30.2235	9.56335	7.64906	6.8223	10.2673
Psocoptera	BO2	Litter	-30.1688	-0.0129091	-26.3738	44.0611	-1.46333	10.8996	3.79501	-1.45042
Psocoptera	BO4	Litter | Soil	-33.2153	-1.10491	-27.9506	45.1197	-0.904647	9.62287	5.26462	0.200262
Psocoptera	BJ5	Litter	-30.2418	-2.30516	-27.6848	47.1018	-0.757333	11.0222	2.55702	1.54783
Psocoptera	HJ4	Litter	-29.8576	-1.15291	-27.4096	41.3834	-0.600647	10.52	2.44795	0.552262
Psocoptera	HF3	Litter	-30.8969	0.644091	-28.8584		0.166706		2.03855	-0.477385
Psocoptera	BJ3	Litter	-29.9815	-2.48791	-27.3028	45.161	0.628667	10.7133	2.67869	3.11658
Psocoptera	BR1	Litter | Soil	-30.5444	-0.679909	-26.4766		0.924353	10.5853	4.06779	1.60426
Psocoptera	HO3	Litter	-29.6632	1.07709	-26.3388	43.3338	1.26167	11.0038	3.32445	0.184576
Psocoptera	HJ3	Litter	-29.8546	-0.187909	-26.8178	44.2042	1.44067	11.2412	3.03679	1.62858
Psocoptera	BJ2	Litter	-29.6834	-3.09891	-26.9666	45.8965	1.73635	10.3792	2.71672	4.83526
Psocoptera	BF4	Litter	-32.0349	-0.703909	-27.5826	50.3384	1.77135	9.57475	4.4523	2.47526
Psocoptera	BF1	Litter | Soil	-32.1422	-0.687409	-27.1876	46.2436	2.01735	10.7252	4.95455	2.70476
Psocoptera	HO2	Litter	-30.4629	0.0450909	-26.0966	43.2434	2.02035	10.7402	4.36621	1.97526
Psocoptera	BR2	Litter	-29.9372	-2.09691	-25.6896	44.2573	2.15635	10.7671	4.24751	4.25326
Psocoptera	HO1	Litter	-28.4487	1.97209	-26.6228	43.5284	2.35567	10.9019	1.82588	0.383576
Psocoptera	BR4	Litter	-30.062	-0.186909	-25.9536	44.8159	2.36935	10.8016	4.10839	2.55626
Psocoptera	BO5	Litter	-30.6942	0.177591	-26.8696	47.0315	2.63935	10.5244	3.8246	2.46176
Psocoptera	HJ2	Litter | Soil	-30.9372	1.15409	-27.6016	43.6382	2.66835	11.4591	3.33556	1.51426
Psocoptera	BJ4	Litter | Soil	-30.343	-1.50791	-28.939		3.00571		1.40403	4.51361
Psocoptera	HR4	Litter	-29.6384	0.265758	-24.8586	43.0934	3.28735	10.9806	4.77973	3.0216
Psocoptera	BR3	Litter | Soil	-29.5816	-1.50491	-25.8156	44.1676	3.37835	10.9827	3.766	4.88326
Psocoptera	BO5	Litter	-30.912	0.952091	-27.7339		3.52671		3.17813	2.57461
Psocoptera	HR3	Litter | Soil	-30.064	1.53209	-24.7576	44.7209	3.64635	11.4419	5.3064	2.11426
Psocoptera	HJ1	Litter	-30.3027	0.428091	-25.8356	43.6926	3.94135	11.0408	4.46708	3.51326
Psocoptera	BF2	Litter | Soil	-32.2495	-0.670909	-26.5945	43.3038	4.039	9.91329	5.65495	4.70991
Psocoptera	HR2	Litter	-29.6179	-1.35591	-25.4486	43.79	4.51635	11.5068	4.16926	5.87226
Psocoptera	HR1	Litter	-29.2332	0.621091	-25.0678	42.3444	5.41967	10.9528	4.16541	4.79858
Psocoptera	HR2	Soil	-29.6179	-1.35591	-26.2367		7.40171		3.38122	8.75761
Psocoptera	HF4	Litter | Soil	-30.5505	0.553091	-26.1801		8.43071		4.37033	7.87761
Soil	HR3	Soil	-30.064	1.53209	-27.6296	1.76323	-2.628	0.12388	2.43448	-4.16009
Soil	HR2	Soil	-29.6179	-1.35591	-28.5501	2.51559	-1.137	0.215711	1.06784	0.218909
Soil	HJ4	Soil	-29.8576	-1.15291	-28.7122	2.95082	-0.857	0.193031	1.14539	0.295909
Soil	HF1	Soil	-30.7821	0.202091	-29.4563	3.08566	-0.811709	0.258134	1.32584	-1.0138
Soil	HJ4	Soil	-29.8576	-1.15291	-28.5954	3.63511	-0.226	0.251017	1.26221	0.926909
Soil	HJ1	Soil	-30.3027	0.428091	-28.3335	3.75178	-0.225	0.258719	1.9692	-0.653091
Soil	BO3	Soil	-28.4809	0.876091	-28.9782	4.65184	-0.169453	0.337816	-0.49731	-1.04554
Soil	BR2	Soil	-29.9372	-2.09691	-27.8737	1.99447	-0.126182	0.159622	2.06348	1.97073
Soil	HO4	Soil	-29.8435	0.147091	-28.0691	2.4884	-0.0976265	0.163429	1.77439	-0.244717
Soil	HO2	Soil	-30.4629	0.0450909	-28.245	1.71403	-0.0592459	0.15835	2.21791	-0.104337
Soil	BR3	Soil	-29.5816	-1.50491			-0.0247213	0.314213		1.48019
Soil	HO2	Soil	-30.4629	0.0450909	-28.4366	1.709	0.169057	0.144265	2.02622	0.123966
Soil	HJ3	Soil	-29.8546	-0.187909	-28.5561	3.68973	0.256	0.274877	1.29847	0.443909
Soil	HO1	Soil	-28.4487	1.97209	-28.6398	2.62707	0.267431	0.182687	-0.191114	-1.70466
Soil	HO4	Soil	-29.8435	0.147091	-29.0282	3.43523	0.274372	0.270574	0.81528	0.127281
Soil	HJ2	Soil	-30.9372	1.15409	-29.3527	2.46637	0.406	0.171448	1.58449	-0.748091
Soil	BR2	Soil	-29.9372	-2.09691	-28.254	2.47666	0.407795	0.199045	1.68312	2.5047
Soil	HF1	Soil	-30.7821	0.202091	-29.296	3.65852	0.411356	0.269301	1.48613	0.209265
Soil	BR1	Soil	-30.5444	-0.679909	-28.5289	3.088	0.437011	0.278003	2.0155	1.11692
Soil	HR3	Soil	-30.064	1.53209	-29.6006	5.02904	0.444585	0.29115	0.463421	-1.08751
Soil	HF4	Soil	-30.5505	0.553091	-29.5572	3.3093	0.51	0.226995	0.993319	-0.0430909
Soil	HF2	Soil	-31.5546	-0.660909	-29.5799	3.67701	0.51678	0.246735	1.97469	1.17769
Soil	BO2	Soil	-30.1688	-0.0129091	-27.8051	3.23213	0.521943	0.247572	2.36369	0.534852
Soil	BO5	Soil	-30.912	0.952091	-28.4323	3.4275	0.573053	0.266467	2.4797	-0.379038
Soil	HR3	Soil	-30.064	1.53209	-27.5623	1.73904	0.575798	0.175744	2.50172	-0.956293
Soil	BO3	Soil	-28.4809	0.876091	-27.5402	4.14545	0.64698	0.312512	0.940642	-0.229111
Soil	HR1	Soil	-29.2332	0.621091	-26.7441	1.51574	0.818357	0.179987	2.4891	0.197266
Soil	HF1	Soil	-30.7821	0.202091	-29.0247	2.87266	0.869767	0.22712	1.75738	0.667676
Soil	HF3	Soil	-30.8969	0.644091	-29.7878	3.3363	0.886119	0.270665	1.10915	0.242028
Soil	BR2	Soil	-29.9372	-2.09691	-29.0705	3.44309	0.971728	0.269717	0.866702	3.06864
Soil	HJ4	Soil	-29.8576	-1.15291	-28.4306	6.18516	0.972776	0.289237	1.42697	2.12569
Soil	HJ2	Soil	-30.9372	1.15409	-29.2307	3.32918	1.00732	0.269715	1.70651	-0.146768
Soil	HF2	Soil	-31.5546	-0.660909	-29.3274	5.16932	1.05004	0.343214	2.22718	1.71094
Soil	HF4	Soil	-30.5505	0.553091	-29.4788	3.98056	1.10902	0.295494	1.07169	0.555933
Soil	HO1	Soil	-28.4487	1.97209	-28.2631	3.07191	1.1095	0.249489	0.185518	-0.862589
Soil	BO3	Soil	-28.4809	0.876091	-27.1493	3.16217	1.21046	0.288618	1.33157	0.334372
Soil	HJ3	Soil	-29.8546	-0.187909	-28.5843	3.73001	1.302	0.279102	1.27027	1.48991
Soil	HO1	Soil	-28.4487	1.97209	-28.1787	2.65549	1.34225	0.224509	0.27	-0.629842
Soil	HJ2	Soil	-30.9372	1.15409	-29.59	4.20992	1.38201	0.323655	1.34721	0.227917
Soil	BR1	Soil	-30.5444	-0.679909	-28.021	5.03598	1.38231	0.331898	2.52346	2.06222
Soil	HR2	Soil	-29.6179	-1.35591	-28.1861	1.99047	1.40089	0.17812	1.43179	2.7568
Soil	HR4	Soil	-29.6384	0.265758	-27.6003	3.62612	1.44745	0.293073	2.03806	1.1817
Soil	HR4	Soil	-29.6384	0.265758	-27.6134	3.21556	1.45178	0.259091	2.02499	1.18602
Soil	HO3	Soil	-29.6632	1.07709	-28.1758	1.8568	1.50187	0.165766	1.48742	0.424784
Soil	BO2	Soil	-30.1688	-0.0129091	-28.1589	3.91369	1.52809	0.282394	2.0099	1.541
Soil	BR1	Soil	-30.5444	-0.679909	-27.4238	2.76542	1.54337	0.310175	3.12059	2.22328
Soil	BO2	Soil	-30.1688	-0.0129091	-28.5533	4.71452	1.55608	0.316789	1.6155	1.56899
Soil	HR1	Soil	-29.2332	0.621091	-26.9144	1.87118	1.57752	0.163942	2.31879	0.956428
Soil	HF2	Soil	-31.5546	-0.660909	-29.2472	7.70535	1.58121	0.454865	2.30737	2.24212
Soil	HF3	Soil	-30.8969	0.644091	-29.8735	4.62662	1.6359	0.318029	1.02347	0.991806
Soil	HR1	Soil	-29.2332	0.621091	-28.0628	3.04513	1.64921	0.283633	1.17037	1.02812
Soil	HR2	Soil	-29.6179	-1.35591	-28.2489	2.21124	1.749	0.194217	1.36897	3.10491
Soil	HO4	Soil	-29.8435	0.147091	-28.1401	3.32932	1.75897	0.227766	1.70342	1.61188
Soil	BJ2	Soil	-29.6834	-3.09891			1.83259	0.527427		4.9315
Soil	HJ1	Soil	-30.3027	0.428091	-28.8775	3.43609	1.92694	0.278189	1.42519	1.49885
Soil	BR3	Soil	-29.5816	-1.50491	-27.6598	4.89967	1.95919	0.415054	1.92188	3.4641
Soil	HR1	Soil	-29.2332	0.621091	-28.0463	2.62901	2.02452	0.254723	1.18684	1.40343
Soil	BJ3	Soil	-29.9815	-2.48791	-28.6151	6.68896	2.03427	0.48433	1.36639	4.52218
Soil	BJ4	Soil	-30.343	-1.50791	-28.9532	6.90825	2.062	0.54697	1.38978	3.56991
Soil	BR4	Soil	-30.062	-0.186909	-28.1925	3.67607	2.10913	0.331387	1.86954	2.29604
Soil	HR4	Soil	-29.6384	0.265758	-27.6819	5.19625	2.1274	0.300028	1.95651	1.86164
Soil	HO3	Soil	-29.6632	1.07709	-28.5897	2.48407	2.15264	0.188735	1.07353	1.07555
Soil	BJ3	Soil	-29.9815	-2.48791	-28.9458	5.65525	2.1652	0.405377	1.03563	4.65311
Soil	HJ3	Soil	-29.8546	-0.187909	-28.4685	3.0497	2.1709	0.262483	1.38608	2.35881
Soil	BO5	Soil	-30.912	0.952091	-28.6451	5.80822	2.18341	0.342927	2.26697	1.23132
Soil	HF4	Soil	-30.5505	0.553091	-29.4906	5.15308	2.25171	0.341595	1.05988	1.69862
Soil	BJ4	Soil	-30.343	-1.50791	-29.2835	7.78179	2.28254	0.671556	1.05951	3.79045
Soil	BR4	Soil	-30.062	-0.186909	-28.4883	6.6164	2.36407	0.446266	1.57375	2.55098
Soil	BF3	Soil	-32.1422	-0.687409			2.41759	0.631052		3.105
Soil	BJ3	Soil	-29.9815	-2.48791	-28.9777	4.54504	2.49851	0.312183	1.00377	4.98642
Soil	HO3	Soil	-29.6632	1.07709	-28.5456	1.81319	2.5582	0.155018	1.11767	1.48111
Soil	HJ1	Soil	-30.3027	0.428091	-28.4395	2.69625	2.5765	0.248808	1.8632	2.1484
Soil	BF4	Soil	-32.0349	-0.703909	-30.0649	6.79389	2.59112	0.35404	1.97009	3.29503
Soil	BJ2	Soil	-29.6834	-3.09891	-29.2536	7.86025	2.60867	0.554745	0.429792	5.70758
Soil	BJ4	Soil	-30.343	-1.50791	-28.9612	4.98169	2.62041	0.422852	1.38179	4.12832
Soil	BF4	Soil	-32.0349	-0.703909	-29.5244	5.36056	2.72395	0.307489	2.51059	3.42786
Soil	BJ5	Soil	-30.9594	-2.12591	-29.261	9.17335	2.97758	0.531207	1.69836	5.10349
Soil	BF3	Soil	-32.1422	-0.687409	-30.3547	6.23041	3.00817	0.35987	1.78746	3.69558
Soil	BO4	Soil	-33.2153	-1.10491	-28.7648	5.70552	3.07681	0.438897	4.45047	4.18172
Soil	BF4	Soil	-32.0349	-0.703909	-29.4274	4.27817	3.26458	0.271162	2.60757	3.96849
Soil	BF1	Soil	-32.1422	-0.687409	-28.488	4.30876	3.30383	0.348744	3.65423	3.99123
Soil	BO4	Soil	-33.2153	-1.10491	-28.0977	4.09526	3.41482	0.298802	5.11758	4.51973
Soil	BO4	Soil	-33.2153	-1.10491	-28.7127	4.4374	3.43108	0.416156	4.50256	4.53599
Soil	BO4	Soil	-33.2153	-1.10491	-28.6628	5.91456	3.44148	0.487333	4.55246	4.54639
Soil	BO5	Soil	-30.912	0.952091	-28.3868	3.54738	3.47445	0.282474	2.52522	2.52236
Soil	BF2	Soil	-32.2495	-0.670909	-28.5324	9.86311	3.68655	0.872747	3.71705	4.35746
Soil	BF1	Soil	-32.1422	-0.687409	-28.4768	3.18239	3.72368	0.280161	3.66536	4.41109
Soil	BJ2	Soil	-29.6834	-3.09891	-28.8979	6.00561	3.74184	0.413215	0.785506	6.84075
Soil	BF1	Soil	-32.1422	-0.687409	-28.6477	3.83793	4.07561	0.322168	3.49455	4.76302
Soil	BF2	Soil	-32.2495	-0.670909	-28.6177	4.6594	4.13082	0.499294	3.63173	4.80173
Soil	BJ5	Soil	-30.9594	-2.12591	-29.1039	7.49799	4.17228	0.52831	1.85548	6.29819
Soil	BJ5	Soil	-30.9594	-2.12591	-29.3979	7.00082	4.22886	0.473679	1.56149	6.35477
Soil	BF2	Soil	-32.2495	-0.670909	-28.8281	5.77689	4.59313	0.615729	3.42136	5.26404
Soil	HO2	Soil	-30.4629	0.0450909	-29.6967	5.96436	5.21264	0.200607	0.766143	5.16755
Symphyla	BJ4	Litter	-30.343	-1.50791	-26.1709	34.7346	2.88605	9.03826	4.17212	4.39396
Symphyla	BJ3	Litter	-29.9815	-2.48791	-24.9717	39.8921	3.09705	11.2702	5.00976	5.58496
Symphyla	HF4	Litter	-30.5505	0.553091	-26.8278	23.9534	3.57505	4.98533	3.72271	3.02196
Symphyla	BR1	Litter	-30.5444	-0.679909	-25.0621	33.241	3.60505	8.24089	5.48235	4.28496
Symphyla	HJ1	Litter | Soil	-30.3027	0.428091	-25.9313	27.0737	3.69105	6.31214	4.37147	3.26296
Symphyla	BO2	Litter	-30.1688	-0.0129091	-25.1836	43.0433	3.69735	11.1067	4.98514	3.71026
Symphyla	BJ2	Litter | Soil	-29.6834	-3.09891	-26.5944	41.1371	3.74005	9.33665	3.08892	6.83896
Symphyla	HJ2	Litter	-30.9372	1.15409	-25.8661	38.4705	3.88005	10.3065	5.0711	2.72596
Symphyla	HJ2	Soil	-30.9372	1.15409	-26.3969	34.2033	3.90905	8.61059	4.54035	2.75496
Symphyla	HR4	Litter	-29.6384	0.265758	-25.2628	23.2703	4.08805	5.09775	4.37555	3.82229
Symphyla	BO3	Litter	-28.4809	0.876091	-27.3176	45.5115	4.18535	11.2962	1.16324	3.30926
Symphyla	HR2	Litter	-29.6179	-1.35591	-24.8887	22.352	4.26805	5.07613	4.72923	5.62396
Symphyla	HR1	Litter	-29.2332	0.621091	-22.7699	28.7752	4.35805	7.48291	6.46333	3.73696
Symphyla	BJ5	Litter	-30.9594	-2.12591	-26.5581	25.6169	4.42071	4.53589	4.40125	6.54661
Symphyla	BF4	Litter	-32.0349	-0.703909	-25.9607	38.6618	4.59905	10.3061	6.07425	5.30296
Symphyla	BO5	Litter	-30.6942	0.177591	-26.1046	46.3604	4.72235	11.6381	4.5896	4.54476
Symphyla	HO1	Litter	-28.4487	1.97209	-27.4731	28.8245	4.95005	7.07164	0.975577	2.97796
Symphyla	HR3	Litter	-30.064	1.53209	-24.9507	30.0794	5.05405	7.82248	5.11337	3.52196
Symphyla	BF1	Litter	-32.1422	-0.687409	-25.267	36.9057	5.05605	9.53804	6.87517	5.74346
Symphyla	BJ4	Soil	-30.343	-1.50791	-25.8304	38.5512	5.22905	10.7477	4.51265	6.73696
Symphyla	HF2	Litter | Soil	-31.5546	-0.660909	-26.3296	26.312	5.42205	5.90269	5.22496	6.08296
Symphyla	BF2	Litter	-32.2495	-0.670909	-25.06	37.1611	5.59805	9.75502	7.18947	6.26896
Symphyla	BO2	Soil	-30.1688	-0.0129091	-23.762	35.5313	5.66305	9.57463	6.40678	5.67596
Symphyla	BR2	Litter | Soil	-29.9372	-2.09691	-24.6091	32.9552	5.70105	8.86203	5.32805	7.79796
Symphyla	HO3	Litter	-29.6632	1.07709	-25.452	31.7349	5.81305	8.25994	4.21121	4.73596
Symphyla	BF3	Litter	-32.1422	-0.687409	-26.3233	33.7167	5.86405	8.24161	5.81891	6.55146
Symphyla	BF4	Soil	-32.0349	-0.703909	-25.8482	29.7506	5.87805	7.23859	6.18671	6.58196
Symphyla	HR4	Soil	-29.6384	0.265758	-24.2736	38.6104	6.15035	9.51896	5.36473	5.8846
Symphyla	HF1	Litter | Soil	-30.7821	0.202091	-25.781	32.9162	6.15205	8.30916	5.00114	5.94996
Symphyla	BF1	Soil	-32.1422	-0.687409	-26.0448	35.3254	6.23705	8.04124	6.09743	6.92446
Symphyla	HR1	Soil	-29.2332	0.621091	-23.1976	42.4063	6.25635	11.6844	6.03554	5.63526
Symphyla	BJ3	Soil	-29.9815	-2.48791	-25.2126	43.0826	6.29935	11.6992	4.76882	8.78726
Symphyla	BO5	Litter | Soil	-30.912	0.952091	-26.1541	30.7711	6.38105	7.77251	4.75795	5.42896
Symphyla	HO2	Litter | Soil	-30.4629	0.0450909	-25.2733	23.2921	6.42205	5.37914	5.18952	6.37696
Symphyla	HR2	Soil	-29.6179	-1.35591	-24.3716	39.1465	6.42335	9.83757	5.24626	7.77926
Symphyla	BR1	Soil	-30.5444	-0.679909	-24.2206	45.3345	6.54835	12.0654	6.32379	7.22826
Symphyla	HJ4	Litter | Soil	-29.8576	-1.15291	-26.6092	19.7358	6.60741	3.16893	3.24838	7.76032
Symphyla	HF4	Soil	-30.5505	0.553091	-26.9276	22.239	6.63705	4.60943	3.62286	6.08396
Symphyla	BF3	Soil	-32.1422	-0.687409	-26.8488	25.409	6.71505	5.06673	5.29341	7.40246
Symphyla	HO4	Litter | Soil	-29.8435	0.147091	-26.0626	23.5864	6.74705	4.8099	3.78085	6.59996
Symphyla	BO3	Soil	-28.4809	0.876091	-25.4526	45.193	6.81435	12.0747	3.02824	5.93826
Symphyla	HO1	Soil	-28.4487	1.97209	-25.4556	43.2452	6.81535	11.0245	2.99301	4.84326
Symphyla	BF2	Soil	-32.2495	-0.670909	-26.112	29.2599	7.01805	6.7943	6.13742	7.68896
Symphyla	BR4	Litter | Soil	-30.062	-0.186909	-24.3996	44.0472	7.10335	11.7767	5.66239	7.29026
Symphyla	BR3	Litter	-29.5816	-1.50491	-27.6119	14.6855	7.25841	1.59556	1.96973	8.76332
Symphyla	HO3	Soil	-29.6632	1.07709	-25.6895	26.4738	7.47405	6.33895	3.97369	6.39696
Symphyla	HR3	Soil	-30.064	1.53209	-24.2886	41.7652	7.58535	11.225	5.7754	6.05326
Symphyla	BR3	Soil	-29.5816	-1.50491	-25.8703	28.3685	7.59005	6.72235	3.71134	9.09496
Symphyla	HJ3	Litter | Soil	-29.8546	-0.187909	-25.3364	25.4462	7.84805	5.75237	4.51817	8.03596
Symphyla	BJ5	Soil	-30.9594	-2.12591	-26.712	27.1111	7.87671	5.17214	4.24734	10.0026
Symphyla	HF3	Litter | Soil	-30.8969	0.644091	-26.1215	31.5504	7.99305	7.70211	4.77542	7.34896
Thysanoptera	BJ2	Soil	-29.6834	-3.09891	-27.8564	47.2783	0.498706	11.4313	1.82697	3.59761
Thysanoptera	BJ3	Litter | Soil	-29.9815	-2.48791	-26.1885	54.3684	0.798706	11.6949	3.79295	3.28661
Thysanoptera	BJ2	Litter	-29.6834	-3.09891	-26.7136	10.0972	1.12935	2.11339	2.96972	4.22826
Thysanoptera	HR3	Litter | Soil	-30.064	1.53209	-26.5006	28.6207	1.34035	4.28148	3.56348	-0.191737
Thysanoptera	HJ3	Litter | Soil	-29.8546	-0.187909	-26.9026	50.2407	1.43371	10.4769	2.952	1.62161
Thysanoptera	BJ4	Litter | Soil	-30.343	-1.50791	-27.848	53.1347	1.44871	12.7702	2.495	2.95661
Thysanoptera	BR2	Litter | Soil	-29.9372	-2.09691	-25.5373	55.8664	1.58171	12.7694	4.39987	3.67861
Thysanoptera	HF2	Litter | Soil	-31.5546	-0.660909	-28.0601	49.3622	1.68467	5.03485	3.49447	2.34558
Thysanoptera	BF3	Litter | Soil	-32.1422	-0.687409	-26.0625	50.9062	2.24867	7.03238	6.07973	2.93608
Thysanoptera	BR1	Litter	-30.5444	-0.679909	-26.5361	55.1605	2.31971	11.8903	4.00831	2.99961
Thysanoptera	BR3	Litter	-29.5816	-1.50491	-26.5571		2.48471	12.3164	3.02458	3.98961
Thysanoptera	BJ5	Litter	-30.9594	-2.12591	-27.068	64.7501	2.69571	12.458	3.89136	4.82161
Thysanoptera	HJ2	Litter	-30.9372	1.15409	-26.7633	52.1558	2.95171	11.9515	4.17388	1.79761
Thysanoptera	HJ1	Litter	-30.3027	0.428091	-24.951	53.1962	3.31371	11.976	5.35176	2.88561
Thysanoptera	HJ4	Litter	-29.8576	-1.15291	-26.1215	53.3631	3.48071	11.3489	3.73608	4.63361
Thysanoptera	HR1	Litter	-29.2332	0.621091	-25.7017		3.53471	12.0445	3.53153	2.91361
Thysanoptera	BF1	Litter | Soil	-32.1422	-0.687409	-24.7825	49.1611	4.11267	13.1555	7.35973	4.80008
Thysanoptera	HF3	Litter | Soil	-30.8969	0.644091	-27.3151	54.2051	4.12971	11.0106	3.58183	3.48561
Thysanoptera	HO2	Litter | Soil	-30.4629	0.0450909	-27.2292		4.98671	13.2495	3.23362	4.94161
Thysanoptera	HO1	Litter | Soil	-28.4487	1.97209	-28.6165	54.7652	5.15471	11.2947	-0.167853	3.18261
Thysanoptera	BF4	Litter | Soil	-32.0349	-0.703909	-26.2906	9.76181	5.31135	1.35078	5.7443	6.01526
Thysanoptera	HO4	Litter | Soil	-29.8435	0.147091	-27.358	56.4188	5.44071	10.0012	2.48547	5.29361
Thysanoptera	HR4	Litter	-29.6384	0.265758	-26.8774	69.7511	5.80071	10.8481	2.76093	5.53495
Thysanoptera	HO3	Litter | Soil	-29.6632	1.07709	-28.1454		6.45571	14.1084	1.51786	5.37861
Thysanoptera	BF2	Litter | Soil	-32.2495	-0.670909	-27.1391	59.3235	7.91367	5.14079	5.11033	8.58458
Mesostigmata	BF1	Litter | Soil	-32.1422	-0.687409	-25.695	40.1482	5.83825	6.60344	6.44715	6.52566
Mesostigmata	BF1	Litter | Soil	-32.1422	-0.687409	-27.0924	36.5127	3.86425	5.07447	5.04982	4.55166
Mesostigmata	BF1	Litter | Soil	-32.1422	-0.687409	-28.2018	35.6308	5.61925	3.00244	3.94042	6.30666
Mesostigmata	BF1	Litter | Soil	-32.1422	-0.687409	-28.5361	38.2294	6.71625	1.93839	3.60606	7.40366
Mesostigmata	BF1	Litter | Soil	-32.1422	-0.687409	-25.6847	53.2597	6.90025	13.4052	6.45747	7.58766
Mesostigmata	BF1	Litter | Soil	-32.1422	-0.687409	-27.8633	36.9327	9.73125	1.02478	4.27892	10.4187
Mesostigmata	BF1	Litter | Soil	-32.1422	-0.687409	-28.1378	38.0058	5.82025	0.858952	4.00441	6.50766
Mesostigmata	BF1	Litter | Soil	-32.1422	-0.687409	-28.0191	43.0697	10.4192	1.04654	4.12309	11.1067
Mesostigmata	BF1	Litter | Soil	-32.1422	-0.687409	-27.2988	36.7965	7.58425	2.48101	4.84342	8.27166
Mesostigmata	BF2	Litter | Soil	-32.2495	-0.670909	-29.2792	31.8947	7.18525	1.2545	2.97027	7.85616
Mesostigmata	BF2	Litter | Soil	-32.2495	-0.670909	-29.3483	35.0771	6.94625	0.924748	2.90113	7.61716
Mesostigmata	BF2	Litter | Soil	-32.2495	-0.670909	-28.1491	40.487	14.4283	0.703667	4.10031	15.0992
Mesostigmata	BF2	Litter | Soil	-32.2495	-0.670909	-28.0728	38.8992	10.0783	1.38006	4.17668	10.7492
Mesostigmata	BF3	Litter | Soil	-32.1422	-0.687409	-27.6837	39.8564	10.2332	1.49166	4.45849	10.9207
Mesostigmata	BF3	Litter | Soil	-32.1422	-0.687409	-28.3906	36.973	7.03825	2.14488	3.75157	7.72566
Mesostigmata	BF3	Litter | Soil	-32.1422	-0.687409	-29.5805	32.4589	7.62725	0.681121	2.56167	8.31466
Mesostigmata	BF3	Litter | Soil	-32.1422	-0.687409	-28.4887	38.6564	5.65025	2.57076	3.65353	6.33766
Mesostigmata	BF4	Litter | Soil	-32.0349	-0.703909	-26.5382	42.7093	5.84025	9.13111	5.49675	6.54416
Mesostigmata	BF4	Litter | Soil	-32.0349	-0.703909	-27.9077	40.7179	7.40325	4.79532	4.12729	8.10716
Mesostigmata	BF4	Litter | Soil	-32.0349	-0.703909	-26.7549	38.1736	7.48125	5.9819	5.28003	8.18516
Mesostigmata	BF4	Litter | Soil	-32.0349	-0.703909	-27.0655	40.4822	7.89525	5.98281	4.9694	8.59916
Mesostigmata	BF4	Litter | Soil	-32.0349	-0.703909	-26.8395	41.865	6.63825	7.38081	5.19541	7.34216
Mesostigmata	BF4	Litter | Soil	-32.0349	-0.703909	-28.1698	45.5575	7.85525	3.55153	3.86516	8.55916
Mesostigmata	BF4	Litter | Soil	-32.0349	-0.703909	-28.113	55.8403	4.05625	6.97379	3.92192	4.76016
Mesostigmata	BF4	Litter | Soil	-32.0349	-0.703909	-28.1233	151.318	3.86725	10.789	3.9116	4.57116
Mesostigmata	BJ2	Litter | Soil	-29.6834	-3.09891	-26.5784	51.4652	2.85025	12.1724	3.10493	5.94916
Mesostigmata	BJ2	Litter | Soil	-29.6834	-3.09891	-27.4783	71.8366	6.99325	7.73186	2.20502	10.0922
Mesostigmata	BJ2	Litter | Soil	-29.6834	-3.09891	-26.273	56.8479	3.94325	11.4199	3.4104	7.04216
Mesostigmata	BJ2	Litter | Soil	-29.6834	-3.09891	-27.8684	40.6476	7.43325	2.59905	1.81493	10.5322
Mesostigmata	BJ2	Litter | Soil	-29.6834	-3.09891	-27.9582	66.1045	11.9343	3.18554	1.72514	15.0332
Mesostigmata	BJ3	Litter | Soil	-29.9815	-2.48791	-26.402	48.3487	4.31925	8.51101	3.5795	6.80716
Mesostigmata	BJ3	Litter | Soil	-29.9815	-2.48791	-26.1852	53.0256	4.35625	10.3826	3.79622	6.84416
Mesostigmata	BJ3	Litter | Soil	-29.9815	-2.48791	-28.2585	64.8869	9.65325	2.10747	1.72293	12.1412
Mesostigmata	BJ3	Litter | Soil	-29.9815	-2.48791	-27.7663	85.2415	14.3513	5.35576	2.2152	16.8392
Mesostigmata	BJ4	Litter | Soil	-30.343	-1.50791	-26.2688	38.5133	4.15925	6.89655	4.07418	5.66716
Mesostigmata	BJ4	Litter | Soil	-30.343	-1.50791	-28.2183	52.5119	9.45725	2.52508	2.12473	10.9652
Mesostigmata	BJ4	Litter | Soil	-30.343	-1.50791	-27.8323	53.1504	7.56725	3.55945	2.5107	9.07516
Mesostigmata	BO3	Litter | Soil	-28.4809	0.876091	-27.7085	50.5758	8.31925	11.3428	0.772409	7.44316
Mesostigmata	BO3	Litter | Soil	-28.4809	0.876091	-28.2668	58.5587	8.08725	2.61987	0.214097	7.21116
Mesostigmata	BO5	Litter | Soil	-30.912	0.952091	-26.8829	63.7382	7.52225	10.3443	4.02915	6.57016
Mesostigmata	BO5	Litter | Soil	-30.912	0.952091	-27.209	63.672	8.01825	8.68603	3.70304	7.06616
Mesostigmata	BR1	Litter | Soil	-30.5444	-0.679909	-26.7312	49.7743	5.22225	6.09418	3.81326	5.90216
Mesostigmata	BR1	Litter | Soil	-30.5444	-0.679909	-27.4464	104.554	8.38125	10.388	3.09808	9.06116
Mesostigmata	BR1	Litter | Soil	-30.5444	-0.679909	-27.3535	91.5826	6.76925	7.62909	3.19096	7.44916
Mesostigmata	BR1	Litter | Soil	-30.5444	-0.679909	-25.5784	55.3213	5.69725	10.4883	4.966	6.37716
Mesostigmata	BR1	Litter | Soil	-30.5444	-0.679909	-27.338	59.1486	7.40725	5.06889	3.20644	8.08716
Mesostigmata	BR1	Litter | Soil	-30.5444	-0.679909	-27.1966	53.6867	4.39225	4.88443	3.34783	5.07216
Mesostigmata	BR2	Litter | Soil	-29.9372	-2.09691	-27.4536	48.7081	5.13725	5.57886	2.48358	7.23416
Mesostigmata	BR2	Litter | Soil	-29.9372	-2.09691	-26.9778	52.0209	5.47025	4.67971	2.95933	7.56716
Mesostigmata	BR4	Litter | Soil	-30.062	-0.186909	-25.7105	47.8994	6.10325	8.87054	4.35151	6.29016
Mesostigmata	BR4	Litter | Soil	-30.062	-0.186909	-25.9665	53.8986	3.77725	11.5184	4.09557	3.96416
Mesostigmata	HF1	Litter | Soil	-30.7821	0.202091	-26.6847	63.1431	7.20125	10.4129	4.09738	6.99916
Mesostigmata	HF1	Litter | Soil	-30.7821	0.202091	-27.3865	46.1387	5.24825	5.6757	3.39562	5.04616
Mesostigmata	HF1	Litter | Soil	-30.7821	0.202091	-25.9747	46.6325	5.15325	9.99922	4.80739	4.95116
Mesostigmata	HF3	Litter | Soil	-30.8969	0.644091	-27.4907	51.0592	5.91225	7.70607	3.40619	5.26816
Mesostigmata	HF3	Litter | Soil	-30.8969	0.644091	-27.9882	55.1956	1.40325	5.34781	2.90877	0.759159
Mesostigmata	HF4	Litter | Soil	-30.5505	0.553091	-26.3947	46.5226	3.02425	10.1373	4.15574	2.47116
Mesostigmata	HF4	Litter | Soil	-30.5505	0.553091	-27.0377	45.2972	3.43425	7.96515	3.5128	2.88116
Mesostigmata	HF4	Litter | Soil	-30.5505	0.553091	-28.3132	42.6924	5.01225	2.02259	2.23725	4.45916
Mesostigmata	HF4	Litter | Soil	-30.5505	0.553091	-26.4928	47.1668	3.04225	10.7913	4.0577	2.48916
Mesostigmata	HF4	Litter | Soil	-30.5505	0.553091	-26.7559	47.7847	3.25425	9.31765	3.79454	2.70116
Mesostigmata	HJ1	Litter | Soil	-30.3027	0.428091	-25.7704	41.0544	5.67425	6.14837	4.53235	5.24616
Mesostigmata	HJ1	Litter | Soil	-30.3027	0.428091	-28.5527	11.35	4.22425	0.289736	1.75008	3.79616
Mesostigmata	HJ1	Litter | Soil	-30.3027	0.428091	-25.1357	35.4774	5.70125	6.01964	5.16703	5.27316
Mesostigmata	HJ1	Litter | Soil	-30.3027	0.428091	-27.434	13.0912	4.62925	1.17749	2.86876	4.20116
Mesostigmata	HJ1	Litter | Soil	-30.3027	0.428091	-26.8096	423.646	2.84825	93.8724	3.49312	2.42016
Mesostigmata	HJ2	Litter | Soil	-30.9372	1.15409	-27.8788	7.08674	7.12725	0.546183	3.05845	5.97316
Mesostigmata	HJ2	Litter | Soil	-30.9372	1.15409	-25.9386	877.686	5.58125	223.711	4.99861	4.42716
Mesostigmata	HJ2	Litter | Soil	-30.9372	1.15409	-25.081	7.72521	5.65825	1.17619	5.8562	4.50416
Mesostigmata	HJ2	Litter | Soil	-30.9372	1.15409	-27.8994	58.8241	4.40825	3.83105	3.03781	3.25416
Mesostigmata	HJ2	Litter | Soil	-30.9372	1.15409	-25.9603	913.979	4.41225	174.156	4.97693	3.25816
Mesostigmata	HJ4	Litter | Soil	-29.8576	-1.15291	-25.8364	47.8248	3.83925	9.9757	4.02116	4.99216
Mesostigmata	HJ4	Litter | Soil	-29.8576	-1.15291	-26.2121	54.6026	4.25425	9.97733	3.64551	5.40716
Mesostigmata	HJ4	Litter | Soil	-29.8576	-1.15291	-28.1326	32.9499	4.25925	1.3736	1.72496	5.41216
Mesostigmata	HJ4	Litter | Soil	-29.8576	-1.15291	-26.9056	56.9516	4.71325	6.26083	2.95201	5.86616
Mesostigmata	HJ4	Litter | Soil	-29.8576	-1.15291	-27.3363	66.8029	8.03531	4.73797	2.52126	9.18822
Mesostigmata	HO1	Litter | Soil	-28.4487	1.97209	-26.8719	42.8113	8.60931	5.56317	1.57673	6.63722
Mesostigmata	HO1	Litter | Soil	-28.4487	1.97209	-28.2414	55.8085	5.88231	2.40542	0.207263	3.91022
Mesostigmata	HO1	Litter | Soil	-28.4487	1.97209	-28.2693	79.5632	4.80731	5.23369	0.179399	2.83522
Mesostigmata	HO3	Litter | Soil	-29.6632	1.07709	-25.067	66.5323	6.73831	12.4945	4.59626	5.66122
Mesostigmata	HO3	Litter | Soil	-29.6632	1.07709	-27.2383	67.5133	9.55231	9.07904	2.42493	8.47522
Mesostigmata	HO3	Litter | Soil	-29.6632	1.07709	-27.8792	53.9109	11.0883	2.90189	1.78406	10.0112
Mesostigmata	HO3	Litter | Soil	-29.6632	1.07709	-27.2073	60.2766	8.77631	7.25131	2.45589	7.69922
Mesostigmata	HO3	Litter | Soil	-29.6632	1.07709	-28.5046	103.158	5.33631	3.59332	1.15867	4.25922
Mesostigmata	HO4	Litter | Soil	-29.8435	0.147091	-26.5665	51.1795	9.28231	10.3597	3.27703	9.13522
Mesostigmata	HO4	Litter | Soil	-29.8435	0.147091	-28.3725	72.1504	3.14131	2.82161	1.47103	2.99422
Mesostigmata	HR1	Litter | Soil	-29.2332	0.621091	-24.0257	40.6593	6.25831	7.71633	5.20751	5.63722
Mesostigmata	HR1	Litter | Soil	-29.2332	0.621091	-24.7089	45.4125	11.0363	9.88492	4.52433	10.4152
Mesostigmata	HR1	Litter | Soil	-29.2332	0.621091	-24.0793	50.6454	6.82131	10.8827	5.15385	6.20022
Mesostigmata	HR2	Litter | Soil	-29.6179	-1.35591	-25.2651	57.342	6.79031	9.75414	4.35279	8.14622
Mesostigmata	HR2	Litter | Soil	-29.6179	-1.35591	-26.0236	57.4658	6.34831	11.0864	3.59427	7.70422
Mesostigmata	HR2	Litter | Soil	-29.6179	-1.35591	-26.2661	55.2737	6.52331	9.4254	3.35175	7.87922
Mesostigmata	HR2	Litter | Soil	-29.6179	-1.35591	-26.8245	60.9606	7.56131	7.94869	2.79344	8.91722
Mesostigmata	HR2	Litter | Soil	-29.6179	-1.35591	-26.519	46.0132	9.08831	7.62409	3.09891	10.4442
Mesostigmata	HR2	Litter | Soil	-29.6179	-1.35591	-27.6325	60.004	7.52931	5.26284	1.98539	8.88522
Mesostigmata	HR3	Litter | Soil	-30.064	1.53209	-26.487	53.7202	7.58231	4.42824	3.57705	6.05022
Mesostigmata	HR3	Litter | Soil	-30.064	1.53209	-26.0876	57.0165	7.57531	5.60769	3.97644	6.04322
Mesostigmata	HR3	Litter | Soil	-30.064	1.53209	-26.0948	36.217	7.34431	3.65117	3.96921	5.81222
Mesostigmata	HR4	Litter | Soil	-29.6384	0.265758	-29.1898	48.5085	4.74031	1.19354	0.448576	4.47455
Mesostigmata	HR4	Litter | Soil	-29.6384	0.265758	-27.4653	61.5411	4.33131	5.34518	2.17305	4.06555
Mesostigmata	BF1	Litter | Soil	-32.1422	-0.687409	-27.4994	38.2605	8.10431	2.89443	4.64281	8.79172
Mesostigmata	BF2	Litter | Soil	-32.2495	-0.670909	-28.7502	33.9248	7.58531	0.513331	3.49928	8.25622
Mesostigmata	BF2	Litter | Soil	-32.2495	-0.670909	-29.2517	34.2556	8.13731	1.6395	2.99773	8.80822
Mesostigmata	BF2	Litter | Soil	-32.2495	-0.670909	-28.8193	35.1213	5.88231	1.37972	3.43014	6.55322
Mesostigmata	BF2	Litter | Soil	-32.2495	-0.670909	-29.1919	33.9264	7.45831	0.634578	3.05759	8.12922
Mesostigmata	BF2	Litter | Soil	-32.2495	-0.670909	-29.7368	34.1587	5.66331	0.627023	2.51269	6.33422
Mesostigmata	BF3	Litter | Soil	-32.1422	-0.687409	-26.9885	38.5904	8.77731	2.69688	5.15365	9.46472
Mesostigmata	BF3	Litter | Soil	-32.1422	-0.687409	-30.2135	31.7442	8.48331	0.967636	1.92865	9.17072
Mesostigmata	BF3	Litter | Soil	-32.1422	-0.687409	-30.8358	32.0498	6.11231	0.236308	1.30635	6.79972
Mesostigmata	BF3	Litter | Soil	-32.1422	-0.687409	-27.2631	36.9961	6.91031	4.9254	4.87914	7.59772
Mesostigmata	BF3	Litter | Soil	-32.1422	-0.687409	-27.8565	34.4021	8.94331	3.32469	4.28574	9.63072
Mesostigmata	BF3	Litter | Soil	-32.1422	-0.687409	-29.2445	34.6745	7.84631	1.8622	2.8977	8.53372
Mesostigmata	BF4	Litter | Soil	-32.0349	-0.703909	-26.7811	43.1582	4.88631	9.29201	5.25383	5.59022
Mesostigmata	BF4	Litter | Soil	-32.0349	-0.703909	-26.3601	43.7452	5.17231	11.0059	5.67488	5.87622
Mesostigmata	BJ4	Litter | Soil	-30.343	-1.50791	-26.6026	45.1023	5.67431	7.97151	3.74043	7.18222
[truncated: 4 more rows]
