# Supplementary material for: Tropical land use alters functional diversity of soil food webs and leads to monopolization of the detrital energy channel
Source: eLife. 2022 Mar 31;11:e75428. doi: 10.7554/eLife.75428 (PMC9033302; doi:10.7554/eLife.75428)
Supplement: Figure 3—source data 1. [file elife-75428-fig3-data1.csv]

ID	System	Region	min_d13C	min_d15N	max_d13C	max_d15N	range_d13C	range_d15N	IPos_d13C	IPos_d15N	IRic	IDiv	IDis	IEve	IUni
BF1	F	B	0.366203494	0.354296013	0.872193771	0.823470292	0.505990277	0.469174279	0.683616248	0.559944663	0.146836	0.701639	0.438102069	0.85327	0.439351406
BF2	F	B	0.479142095	0.230081141	0.878816789	0.774336514	0.399674694	0.544255373	0.692371847	0.581666102	0.143242	0.767694	0.43983133	0.79912	0.331485343
BF3	F	B	0.492072664	0.357711013	1	0.791847746	0.507927336	0.434136733	0.697947845	0.547744171	0.147222	0.71028	0.474598017	0.826077	0.497397072
BF4	F	B	0.492072664	0.409840805	0.860200893	0.728297187	0.368128229	0.318456382	0.671753178	0.567331932	0.077444	0.721561	0.524256043	0.801088	0.573782683
BJ2	J	B	0.314836875	0.107359799	0.602897526	0.835013377	0.288060651	0.727653578	0.456671752	0.581991015	0.132435	0.672261	0.330509487	0.753197	0.408257778
BJ3	J	B	0.322336059	0.125482098	0.688712128	1	0.366376068	0.874517902	0.512328064	0.56647213	0.1957	0.688263	0.400506536	0.753097	0.287454178
BJ4	J	B	0.250722752	0.170724464	0.632974923	0.954701483	0.382252171	0.78397702	0.496676244	0.553153218	0.164523	0.728115	0.411353064	0.716576	0.295643431
BJ5	J	B	0.386162706	0.107359799	0.738819192	0.870758146	0.352656486	0.763398348	0.542410842	0.567433951	0.15631	0.682447	0.341258513	0.747836	0.214485248
BO2	O	B	0.331549802	0.267537239	0.711350699	0.687591564	0.379800897	0.420054326	0.506354579	0.514670331	0.108508	0.763302	0.641173231	0.762321	0.491646675
BO3	O	B	0.127872435	0.226071451	0.551610132	0.677221502	0.423737697	0.451150051	0.33221024	0.496034453	0.109018	0.744433	0.578302653	0.827303	0.435854881
BO4	O	B	0.328552489	0.301821426	0.909701512	0.764316756	0.581149023	0.46249533	0.574958608	0.482971096	0.184585	0.769183	0.545291759	0.838919	0.428388118
BO5	O	B	0.283302366	0.301821426	0.705572264	0.723842118	0.422269898	0.422020692	0.507112651	0.530013646	0.111562	0.797011	0.651569072	0.862082	0.512418441
BR1	R	B	0.358126129	0.285836499	0.819415132	0.725889076	0.461289003	0.440052578	0.577594586	0.533405807	0.117965	0.747627	0.504928475	0.80428	0.433049567
BR2	R	B	0.379163941	0.286114469	0.675782801	0.755229375	0.29661886	0.469114906	0.527798795	0.561898618	0.072231	0.74423	0.452355603	0.6699	0.364270941
BR3	R	B	0.27293146	0.286114469	0.658236741	0.785698024	0.385305281	0.499583554	0.496659011	0.596925127	0.11383	0.726619	0.464690334	0.836174	0.368081596
BR4	R	B	0.316906022	0.263100462	0.709128207	0.755229375	0.392222184	0.492128913	0.534947079	0.550509382	0.123433	0.686293	0.473270152	0.725168	0.304812678
HF1	F	H	0.428471819	0.287133016	0.77724132	0.701243906	0.348769502	0.414110891	0.587618612	0.489721028	0.093316	0.75598	0.486185149	0.752256	0.320442571
HF2	F	H	0.490708668	0.280655296	0.821665902	0.692594105	0.330957234	0.411938809	0.635679796	0.498154545	0.11129	0.774876	0.629374477	0.746394	0.435749535
HF3	F	H	0.357774905	0.019395055	0.749221667	0.727631446	0.391446761	0.708236392	0.583265301	0.494361896	0.149061	0.707668	0.334577453	0.702216	0.179756949
HF4	F	H	0	0.363073812	0.777652595	0.776798436	0.777652595	0.413724624	0.514154151	0.513760399	0.162333	0.699534	0.311251899	0.748979	0.218358115
HJ1	J	H	0.363719107	0	0.721358288	0.669066212	0.357639181	0.669066212	0.574598094	0.468107486	0.135987	0.677817	0.274724139	0.642011	0.145554169
HJ2	J	H	0.464011033	0.196597298	0.793848943	0.762848424	0.329837909	0.566251126	0.566214136	0.458999698	0.094709	0.665027	0.396487652	0.63176	0.217479828
HJ3	J	H	0.348400234	0.107359799	0.701138057	0.762848424	0.352737823	0.655488626	0.509371784	0.494490667	0.13259	0.70415	0.433017191	0.715114	0.461200098
HJ4	J	H	0.336641734	0.107359799	0.667059937	0.762848424	0.330418203	0.655488626	0.490041791	0.539447231	0.141733	0.724795	0.357730504	0.645643	0.174603276
HO1	O	H	0.144473667	0.276313258	0.541740137	0.687114281	0.39726647	0.410801023	0.350474216	0.473549188	0.093433	0.723006	0.616960663	0.846859	0.521706597
HO2	O	H	0.289452603	0.106954831	0.698988093	0.739094763	0.40953549	0.632139932	0.484833515	0.512926803	0.159981	0.715509	0.388428803	0.731308	0.274125244
HO3	O	H	0.295916793	0.31160724	0.633994451	0.641288612	0.338077659	0.329681372	0.446221607	0.476012094	0.067826	0.832338	0.712122439	0.784308	0.430718511
HO4	O	H	0.289452603	0.328400208	0.622792347	0.715192085	0.333339744	0.386791877	0.438412537	0.530528763	0.077723	0.714173	0.588135071	0.791967	0.468873265
HR1	R	H	0.332776287	0.337535679	0.84596624	0.69464872	0.513189954	0.357113041	0.537004578	0.550936472	0.102303	0.660124	0.431376334	0.779159	0.414226558
HR2	R	H	0.367370582	0.286114469	0.642884452	0.788426791	0.27551387	0.502312322	0.520510187	0.583402872	0.082042	0.719193	0.441210878	0.714892	0.492668688
HR3	R	H	0.419130988	0.221967326	0.862680348	0.755229375	0.44354936	0.533262049	0.595367517	0.535423841	0.115432	0.705737	0.390583647	0.821029	0.54507642
HR4	R	H	0.337570475	0.286114469	0.815362572	0.755229375	0.477792097	0.469114906	0.543429879	0.529877455	0.117452	0.729172	0.566189663	0.758427	0.345994205
