# Supplementary material for: Tropical land use alters functional diversity of soil food webs and leads to monopolization of the detrital energy channel
Source: eLife. 2022 Mar 31;11:e75428. doi: 10.7554/eLife.75428 (PMC9033302; doi:10.7554/eLife.75428)
Supplement: Figure 3—source data 2. [file elife-75428-fig3-data2.csv]

ID	System	Region	min_d13C	min_d15N	max_d13C	max_d15N	range_d13C	range_d15N	IPos_d13C	IPos_d15N	IRic	IDiv	IDis	IEve	IUni
BF1	F	B	0.366	0.354	0.872	0.823	0.506	0.469	0.718	0.578	0.147	0.533	0.288	0.431	0.29
BF2	F	B	0.479	0.23	0.879	0.774	0.4	0.544	0.639	0.557	0.143	0.815	0.514	0.485	0.349
BF3	F	B	0.492	0.358	1	0.792	0.508	0.434	0.704	0.591	0.147	0.8	0.431	0.368	0.485
BF4	F	B	0.492	0.41	0.86	0.728	0.368	0.318	0.667	0.581	0.077	0.711	0.548	0.584	0.555
BJ2	J	B	0.315	0.107	0.603	0.835	0.288	0.728	0.585	0.682	0.132	0.937	0.09	0.382	0.483
BJ3	J	B	0.322	0.125	0.689	1	0.366	0.875	0.624	0.669	0.196	0.95	0.074	0.479	0.174
BJ4	J	B	0.251	0.171	0.633	0.955	0.382	0.784	0.546	0.568	0.165	0.871	0.334	0.191	0.28
BJ5	J	B	0.386	0.107	0.739	0.871	0.353	0.763	0.547	0.633	0.156	0.612	0.251	0.127	0.189
BO2	O	B	0.332	0.268	0.711	0.688	0.38	0.42	0.632	0.547	0.109	0.72	0.129	0.378	0.57
BO3	O	B	0.128	0.226	0.552	0.677	0.424	0.451	0.383	0.498	0.109	0.643	0.43	0.434	0.478
BO4	O	B	0.329	0.302	0.91	0.764	0.581	0.462	0.826	0.682	0.185	0.965	0.166	0.56	0.516
BO5	O	B	0.283	0.302	0.706	0.724	0.422	0.422	0.611	0.502	0.112	0.903	0.177	0.227	0.537
BR1	R	B	0.358	0.286	0.819	0.726	0.461	0.44	0.573	0.515	0.118	0.829	0.559	0.679	0.513
BR2	R	B	0.379	0.286	0.676	0.755	0.297	0.469	0.479	0.513	0.072	0.918	0.52	0.7	0.707
BR3	R	B	0.273	0.286	0.658	0.786	0.385	0.5	0.638	0.709	0.114	0.977	0.063	0.431	0.271
BR4	R	B	0.317	0.263	0.709	0.755	0.392	0.492	0.676	0.603	0.123	0.957	0.096	0.511	0.258
HF1	F	H	0.428	0.287	0.777	0.701	0.349	0.414	0.604	0.555	0.093	0.817	0.291	0.431	0.184
HF2	F	H	0.491	0.281	0.822	0.693	0.331	0.412	0.695	0.561	0.111	0.616	0.302	0.267	0.489
HF3	F	H	0.358	0.019	0.749	0.728	0.391	0.708	0.615	0.564	0.149	0.606	0.133	0.105	0.111
HF4	F	H	0	0.363	0.778	0.777	0.778	0.414	0.529	0.567	0.162	0.664	0.222	0.259	0.179
HJ1	J	H	0.364	0	0.721	0.669	0.358	0.669	0.689	0.536	0.136	0.93	0.114	0.483	0.191
HJ2	J	H	0.464	0.197	0.794	0.763	0.33	0.566	0.573	0.483	0.095	0.68	0.349	0.473	0.138
HJ3	J	H	0.348	0.107	0.701	0.763	0.353	0.655	0.694	0.589	0.133	0.982	0.03	0.322	0.977
HJ4	J	H	0.337	0.107	0.667	0.763	0.33	0.655	0.634	0.7	0.142	0.97	0.071	0.139	0.153
HO1	O	H	0.144	0.276	0.542	0.687	0.397	0.411	0.457	0.515	0.093	0.934	0.139	0.591	0.646
HO2	O	H	0.289	0.107	0.699	0.739	0.41	0.632	0.583	0.553	0.16	0.806	0.343	0.541	0.179
HO3	O	H	0.296	0.312	0.634	0.641	0.338	0.33	0.626	0.546	0.068	0.994	0.049	0.512	0.491
HO4	O	H	0.289	0.328	0.623	0.715	0.333	0.387	0.613	0.522	0.078	0.976	0.06	0.522	0.48
HR1	R	H	0.333	0.338	0.846	0.695	0.513	0.357	0.689	0.524	0.102	0.98	0.083	0.365	0.44
HR2	R	H	0.367	0.286	0.643	0.788	0.276	0.502	0.569	0.635	0.082	0.686	0.251	0.431	0.339
HR3	R	H	0.419	0.222	0.863	0.755	0.444	0.533	0.77	0.531	0.115	0.888	0.134	0.359	0.833
HR4	R	H	0.338	0.286	0.815	0.755	0.478	0.469	0.665	0.576	0.117	0.819	0.113	0.424	0.207
