# Supplementary material for: Tropical land use alters functional diversity of soil food webs and leads to monopolization of the detrital energy channel
Source: eLife. 2022 Mar 31;11:e75428. doi: 10.7554/eLife.75428 (PMC9033302; doi:10.7554/eLife.75428)
Supplement: Figure 5—source data 1. [file elife-75428-fig5-data1.csv]

	plot	water_soil	soil_Cmic	soil_pH	Litter_amount	CtoNlitter	Csoil	System	Region	Species_richness_trees	Density_trees	Metabolism_of_Annelida	Species_richness_of_understory	Density_of_understory	Height_of_understory
1	BF1	74.44722077	402.1057597	3.863333333	0.208340741	25.56080402	3.871965667	F	B	80	476	0	214.0	17.3	70.3
2	BF2	191.073313	714.6251103	3.973333333	0.159096296	28.00133404	7.01537	F	B	64	384	0.002	254.0	24.1	63.0
3	BF3	137.688422	355.7566334	3.17	0.273096296	35.79464434	14.884924	F	B	50	436	0.0327	127.0	8.9	82.3
4	BF4	40.63811926	608.7035646	3.42	0.151674074	34.30002798	5.519632	F	B	70	544	0.0151	136.0	9.9	83.3
5	BJ2	162.7265763	900.1692475	4.373333333	0.096148148	28.78637102	9.875782333	J	B	36	580	6.5543	135.5	17.7	80.3
6	BJ3	96.99715892	530.4389421	4.44	0.117185185	31.4983207	5.688790667	J	B	24	828	4.8985	162.0	8.6	102.7
7	BJ4	165.0149343	651.1318553	4.426666667	0.125851852	33.57585203	6.765974667	J	B	52	700	1.2081	166.0	29.3	59.3
8	BJ5	110.9204125	584.0926208	4.17	0.127451852	30.2259994	8.005409333	J	B	36	580	0.0022	135.5	17.7	80.3
9	BO2	118.1751933	390.8632691	4.353333333	0.02122963	27.53815143	3.852626667	O	B	1	120	3.1888	57.0	101.6	14.7
10	BO3	123.5188495	340.2858136	4.346666667	0.058725926	27.22451828	3.5750215	O	B	1	144	2.7844	63.0	97.0	15.5
11	BO4	84.68713142	778.9925064	4.493333333	0.027051852	33.53095714	5.282093	O	B	1	144	1.171	73.0	37.2	15.6
12	BO5	51.71728079	506.463651	4.526666667	0.033481481	26.07303018	4.330727667	O	B	1	138	2.4316	67.3	83.1	15.3
13	BR1	91.84920674	482.7728572	4.226666667	0.0756	30.84157106	3.575881667	R	B	3	504	0.0024	59.0	43.7	30.5
14	BR2	98.44185998	510.5290344	4.306666667	0.080222222	32.32200816	3.086299	R	B	1	536	0	44.0	10.6	31.8
15	BR3	105.2039794	574.360905	4.485	0.124088889	35.84199735	6.631655	R	B	1	464	2.602	34.0	1.3	24.8
16	BR4	119.6583745	438.436214	4.39	0.160962963	31.71312997	5.007590333	R	B	1	484	2.595	50.0	12.6	32.6
17	HF1	33.18132608	436.7487542	3.93	0.127807407	25.35967709	3.105823	F	H	96	644	0.1404	308.0	10.4	123.5
18	HF2	41.13735525	381.4964778	3.813333333	0.128044444	28.9266551	5.436821	F	H	104	728	0.5884	280.0	12.1	100.0
19	HF3	46.95770875	482.3465473	4.03	0.212933333	27.57861541	4.279609	F	H	95	620	0.8239	297.0	17.1	74.7
20	HF4	38.507628	428.6474374	4.056666667	0.156340741	30.68380449	4.216894	F	H	85	616	0.0601	267.0	27.6	57.0
21	HJ1	38.59111448	667.2792002	4.196666667	0.100355556	26.37753049	3.442244667	J	H	24	336	3.3976	108.0	24.2	61.8
22	HJ2	34.96917339	403.7242073	4.193333333	0.151762963	21.41901525	3.331197667	J	H	32	516	0.1729	118.0	17.2	81.4
23	HJ3	49.56628652	408.2404815	4.323333333	0.075022222	24.03804229	3.800216333	J	H	36	520	10.7216	111.0	15.7	54.9
24	HJ4	36.82130092	325.6151937	4.57	0.1468	30.32401001	4.693287333	J	H	47	580	4.7216	148.0	10.9	121.4
25	HO1	36.80571699	507.6880984	4.733333333	0.021348148	27.28258217	2.787914333	O	H	1	140	2.2453	93.0	127.1	24.6
26	HO2	31.5430618	350.7785554	5.42	0.01357037	24.50437322	2.845842333	O	H	3	152	0.18	43.0	14.0	10.7
27	HO3	23.48925772	315.3105216	4.796666667	0.013925926	21.75189383	1.802760333	O	H	1	140	3.8561	54.0	98.1	9.4
28	HO4	29.35758366	346.460467	4.94	0.015703704	24.65850994	2.856371	O	H	1	128	4.4289	88.0	106.5	16.6
29	HR1	38.36966211	331.7983192	4.446666667	0.0476	25.91415658	2.304562333	R	H	3	340	3.9712	69.0	55.5	37.8
30	HR2	42.81290229	292.13073	4.34	0.089244444	31.36924307	2.337325	R	H	1	292	1.2062	74.0	94.0	41.7
31	HR3	30.80497604	263.1072703	4.523333333	0.065466667	29.28219708	1.700004	R	H	2	444	4.1504	41.0	63.1	14.9
32	HR4	42.27691329	471.6615151	4.44	0.086822222	32.20652879	3.3997925	R	H	2	438	3.4484	53.0	40.1	30.6
