# Supplementary material for: Tropical land use alters functional diversity of soil food webs and leads to monopolization of the detrital energy channel
Source: eLife. 2022 Mar 31;11:e75428. doi: 10.7554/eLife.75428 (PMC9033302; doi:10.7554/eLife.75428)
Supplement: Figure 6—source data 1. [file elife-75428-fig6-data1.xlsx]

## Sheet: Sheet1
TYPE	plot	water_soil	soil_pH	CtoNlitter	soil_Cmic	Litter_amount	Csoil	Species_richness_trees	Density_trees	Annelida	Species_richness_of_understory	Density_of_understory	Height_of_understory	IPos_d13C_W	IPos_d15N_W	IRic_W	IDiv_W	IDis_W	IEve_W	IUni_W	IPos_d13C_U	IPos_d15N_U	IRic_U	IDiv_U	IDis_U	IEve_U	IUni_U	PC1.W	PC2.W	PC1.U	PC2.U	Coleoptera	Formicidae	Protura	Pseudoscorpionida
F	BF1	74.4472	3.86333	25.5608	402.106	0.208341	3.87197	80	476	0	214	17.3	70.3	0.718	0.578	0.147	0.533	0.288	0.431	0.29	0.683616	0.559945	0.146836	0.701639	0.438102	0.85327	0.439351	0.132456	0.0513909	-0.0133259	0.175652	0.1972	0.9346	0.0012	0.079
F	BF2	191.073	3.97333	28.0013	714.625	0.159096	7.01537	64	384	0.002	254	24.1	63	0.639	0.557	0.143	0.815	0.514	0.485	0.349	0.692372	0.581666	0.143242	0.767694	0.439831	0.79912	0.331485	0.235467	0.0216583	-0.0888914	0.0649322	0.7214	0.4669	0.002	0.1009
F	BF3	137.688	3.17	35.7946	355.757	0.273096	14.8849	50	436	0.0327	127	8.9	82.3	0.704	0.591	0.147	0.8	0.431	0.368	0.485	0.697948	0.547744	0.147222	0.71028	0.474598	0.826077	0.497397	0.159087	-0.0388163	0.0276029	0.195371	0.163	0.4551	0.0012	0.2081
F	BF4	40.6381	3.42	34.3	608.704	0.151674	5.51963	70	544	0.0151	136	9.9	83.3	0.667	0.581	0.077	0.711	0.548	0.584	0.555	0.671753	0.567332	0.077444	0.721561	0.524256	0.801088	0.573783	0.257714	-0.116589	0.083357	0.195667	0.1441	0.2504	0	0.2147
J	BJ2	162.727	4.37333	28.7864	900.169	0.0961481	9.87578	36	580	6.5543	135.5	17.7	80.3	0.632	0.547	0.109	0.72	0.129	0.378	0.57	0.506355	0.51467	0.108508	0.763302	0.641173	0.762321	0.491647	-0.0730438	-0.0727195	0.134189	0.139156	0.2374	0.0535	0.0003	0.0527
J	BJ3	96.9972	4.44	31.4983	530.439	0.117185	5.68879	24	828	4.8985	162	8.6	102.7	0.383	0.498	0.109	0.643	0.43	0.434	0.478	0.33221	0.496034	0.109018	0.744433	0.578303	0.827303	0.435855	0.247757	0.162838	0.15786	-0.0187063	0.1588	0.1125	0.0019	0.0686
J	BJ4	165.015	4.42667	33.5759	651.132	0.125852	6.76597	52	700	1.2081	166	29.3	59.3	0.826	0.682	0.185	0.965	0.166	0.56	0.516	0.574959	0.482971	0.184585	0.769183	0.545292	0.838919	0.428388	-0.0635406	0.116949	0.0534068	-0.0450274	0.3093	0.1255	0.001	0.0767
J	BJ5	110.92	4.17	30.226	584.093	0.127452	8.00541	36	580	0.0022	135.5	17.7	80.3	0.611	0.502	0.112	0.903	0.177	0.227	0.537	0.507113	0.530014	0.111562	0.797011	0.651569	0.862082	0.512418	-0.0644208	0.225654	0.134412	-0.0248405	0.1374	0.0227	0.0013	0.0531
O	BO2	118.175	4.35333	27.5382	390.863	0.0212296	3.85263	1	120	3.1888	57	101.6	14.7	0.604	0.555	0.093	0.817	0.291	0.431	0.184	0.587619	0.489721	0.093316	0.75598	0.486185	0.752256	0.320443	0.101401	-0.162838	-0.0318015	-0.0583147	0.06	0.0229	0.0014	0
O	BO3	123.519	4.34667	27.2245	340.286	0.0587259	3.57502	1	144	2.7844	63	97	15.5	0.695	0.561	0.111	0.616	0.302	0.267	0.489	0.63568	0.498155	0.11129	0.774876	0.629374	0.746394	0.43575	0.0955682	-0.15172	0.0630004	-0.185009	0.0518	0.4703	0	0.024
O	BO4	84.6871	4.49333	33.531	778.993	0.0270519	5.28209	1	144	1.171	73	37.2	15.6	0.615	0.564	0.149	0.606	0.133	0.105	0.111	0.583265	0.494362	0.149061	0.707668	0.334577	0.702216	0.179757	-0.0811732	-0.0631199	-0.199052	-0.00884182	0.0444	0.0063	0.0004	0
O	BO5	51.7173	4.52667	26.073	506.464	0.0334815	4.33073	1	138	2.4316	67.3	83.1	15.3	0.529	0.567	0.162	0.664	0.222	0.259	0.179	0.514154	0.51376	0.162333	0.699534	0.311252	0.748979	0.218358	0.0528422	-0.102491	-0.154652	-0.0647752	0.0111	0.0756	0.0003	0.0117
R	BR1	91.8492	4.22667	30.8416	482.773	0.0756	3.57588	3	504	0.0024	59	43.7	30.5	0.457	0.515	0.093	0.934	0.139	0.591	0.646	0.350474	0.473549	0.093433	0.723006	0.616961	0.846859	0.521707	-0.051197	-0.125012	0.211491	0.0418116	0.1128	0.0313	0	0.0101
R	BR2	98.4419	4.30667	32.322	510.529	0.0802222	3.0863	1	536	0	44	10.6	31.8	0.583	0.553	0.16	0.806	0.343	0.541	0.179	0.484834	0.512927	0.159981	0.715509	0.388429	0.731308	0.274125	0.157123	-0.237862	-0.0662519	0.00661583	0.1592	0.0325	0.0002	0
R	BR3	105.204	4.485	35.842	574.361	0.124089	6.63166	1	464	2.602	34	1.3	24.8	0.626	0.546	0.068	0.994	0.049	0.512	0.491	0.446222	0.476012	0.067826	0.832338	0.712122	0.784308	0.430719	-0.209435	0.0860194	0.139525	-0.0221842	0.0102	0.0009	0.0002	0.0139
R	BR4	119.658	4.39	31.7131	438.436	0.160963	5.00759	1	484	2.595	50	12.6	32.6	0.613	0.522	0.078	0.976	0.06	0.522	0.48	0.438413	0.530529	0.077723	0.714173	0.588135	0.791967	0.468873	-0.183592	0.0724431	0.134256	-0.0478289	0.0602	0.0306	0.0011	0.0009
F	HF1	33.1813	3.93	25.3597	436.749	0.127807	3.10582	96	644	0.1404	308	10.4	123.5	0.585	0.682	0.132	0.937	0.09	0.382	0.483	0.456672	0.581991	0.132435	0.672261	0.330509	0.753197	0.408258	-0.156605	0.154114	0.00425593	-0.0433699	0.1774	0.2359	0.0012	0.1362
F	HF2	41.1374	3.81333	28.9267	381.496	0.128044	5.43682	104	728	0.5884	280	12.1	100	0.624	0.669	0.196	0.95	0.074	0.479	0.174	0.512328	0.566472	0.1957	0.688263	0.400507	0.753097	0.287454	-0.161223	-0.0619762	-0.0681199	-0.0229213	0.1038	0.0728	0.0006	0
F	HF3	46.9577	4.03	27.5786	482.347	0.212933	4.27961	95	620	0.8239	297	17.1	74.7	0.546	0.568	0.165	0.871	0.334	0.191	0.28	0.496676	0.553153	0.164523	0.728115	0.411353	0.716576	0.295643	0.0901452	0.331037	-0.0534939	-0.0523581	0.2342	1.1128	0.0003	0.0313
F	HF4	38.5076	4.05667	30.6838	428.647	0.156341	4.21689	85	616	0.0601	267	27.6	57	0.547	0.633	0.156	0.612	0.251	0.127	0.189	0.542411	0.567434	0.15631	0.682447	0.341259	0.747836	0.214485	0.057359	0.175571	-0.161008	-0.0193784	0.0919	0.2688	0.0002	0.1015
J	HJ1	38.5911	4.19667	26.3775	667.279	0.100356	3.44224	24	336	3.3976	108	24.2	61.8	0.573	0.515	0.118	0.829	0.559	0.679	0.513	0.577595	0.533406	0.117965	0.747627	0.504928	0.80428	0.43305	0.267825	0.131231	0.0374579	-0.0296319	0.0734	0.0749	0.0003	0.0214
J	HJ2	34.9692	4.19333	21.419	403.724	0.151763	3.3312	32	516	0.1729	118	17.2	81.4	0.479	0.513	0.072	0.918	0.52	0.7	0.707	0.527799	0.561899	0.072231	0.74423	0.452356	0.6699	0.364271	0.232052	0.175162	-0.00391127	-0.0543698	0.1375	0.2659	0	0.0589
J	HJ3	49.5663	4.32333	24.038	408.24	0.0750222	3.80022	36	520	10.7216	111	15.7	54.9	0.638	0.709	0.114	0.977	0.063	0.431	0.271	0.496659	0.596925	0.11383	0.726619	0.46469	0.836174	0.368082	-0.196329	-0.313275	0.00254048	0.105122	0.0348	0.109	0	0.0025
J	HJ4	36.8213	4.57	30.324	325.615	0.1468	4.69329	47	580	4.7216	148	10.9	121.4	0.676	0.603	0.123	0.957	0.096	0.511	0.258	0.534947	0.550509	0.123433	0.686293	0.47327	0.725168	0.304813	-0.127857	0.285746	-0.0326162	-0.146911	0.122	0.0408	0.0003	0.0161
O	HO1	36.8057	4.73333	27.2826	507.688	0.0213481	2.78791	1	140	2.2453	93	127.1	24.6	0.689	0.536	0.136	0.93	0.114	0.483	0.191	0.574598	0.468107	0.135987	0.677817	0.274724	0.642011	0.145554	-0.0973104	-0.252628	-0.254976	-0.121673	0.0582	0.0722	0	0.0114
O	HO2	31.5431	5.42	24.5044	350.779	0.0135704	2.84584	3	152	0.18	43	14	10.7	0.573	0.483	0.095	0.68	0.349	0.473	0.138	0.566214	0.459	0.094709	0.665027	0.396488	0.63176	0.21748	0.19493	0.138091	-0.11933	-0.0555359	0.0188	0.0105	0	0.0027
O	HO3	23.4893	4.79667	21.7519	315.311	0.0139259	1.80276	1	140	3.8561	54	98.1	9.4	0.694	0.589	0.133	0.982	0.03	0.322	0.977	0.509372	0.494491	0.13259	0.70415	0.433017	0.715114	0.4612	-0.282683	-0.127096	0.0693353	-0.222759	0.0101	0.0166	0	0
O	HO4	29.3576	4.94	24.6585	346.46	0.0157037	2.85637	1	128	4.4289	88	106.5	16.6	0.634	0.7	0.142	0.97	0.071	0.139	0.153	0.490042	0.539447	0.141733	0.724795	0.357731	0.645643	0.174603	-0.235526	-0.12923	-0.172214	-0.0669479	0.0293	0.0506	0	0.0047
R	HR1	38.3697	4.44667	25.9142	331.798	0.0476	2.30456	3	340	3.9712	69	55.5	37.8	0.689	0.524	0.102	0.98	0.083	0.365	0.44	0.537005	0.550936	0.102303	0.660124	0.431376	0.779159	0.414227	-0.173358	-0.0583715	0.0238763	0.100986	0.0902	0.0858	0	0.0021
R	HR2	42.8129	4.34	31.3692	292.131	0.0892444	2.33732	1	292	1.2062	74	94	41.7	0.569	0.635	0.082	0.686	0.251	0.431	0.339	0.52051	0.583403	0.082042	0.719193	0.441211	0.714892	0.492669	0.076424	0.00818836	0.0663453	0.12964	0.134	0.5612	0.0006	0.0227
R	HR3	30.805	4.52333	29.2822	263.107	0.0654667	1.7	2	444	4.1504	41	63.1	14.9	0.77	0.531	0.115	0.888	0.134	0.359	0.833	0.595368	0.535424	0.115432	0.705737	0.390584	0.821029	0.545076	-0.108124	-0.246707	0.0569934	0.250612	0.103	0.1458	0	0
R	HR4	42.2769	4.44	32.2065	471.662	0.0868222	3.39979	2	438	3.4484	53	40.1	30.6	0.665	0.576	0.117	0.819	0.113	0.424	0.207	0.54343	0.529877	0.117452	0.729172	0.56619	0.758427	0.345994	-0.0927331	0.124359	0.0197397	-0.0941821	0.1408	0.0628	0.0004	0

## Sheet: Sheet2
	IUni_U	tree.PC1	PC1
1	0.439351	-0.236608	0.132456					IUni_U	tree.PC1	PC1
2	0.331485	-0.234877	0.235467				1	0.439351	-0.236608	-0.0133259
3	0.497397	-0.162412	0.159087				2	0.331485	-0.234877	-0.0888914
4	0.573783	-0.183712	0.257714				3	0.497397	-0.162412	0.0276029
5	0.408258	-0.0639255	-0.156605				4	0.573783	-0.183712	0.083357
6	0.287454	0.0266609	-0.161223				5	0.408258	-0.0639255	0.00425593
7	0.295643	-0.0901999	0.0901452				6	0.287454	0.0266609	-0.0681199
8	0.214485	-0.0639255	0.057359				7	0.295643	-0.0901999	-0.0534939
9	0.491647	0.119429	-0.0730438				8	0.214485	-0.0639255	-0.161008
10	0.435855	0.128826	0.247757				9	0.491647	0.119429	0.134189
11	0.428388	0.128826	-0.0635407				10	0.435855	0.128826	0.15786
12	0.512418	0.126708	-0.0644209				11	0.428388	0.128826	0.0534068
13	0.43305	0.136132	0.267825				12	0.512418	0.126708	0.134412
14	0.364271	0.176261	0.232052				13	0.43305	0.136132	0.0374579
15	0.368082	0.172447	-0.196329				14	0.364271	0.176261	-0.00391127
16	0.304813	0.173591	-0.127857				15	0.368082	0.172447	0.00254048
17	0.320443	-0.212245	0.101401				16	0.304813	0.173591	-0.0326162
18	0.43575	-0.203837	0.0955682				17	0.320443	-0.212245	-0.0318015
19	0.179757	-0.217746	-0.0811732				18	0.43575	-0.203837	0.0630004
20	0.218358	-0.197077	0.0528422				19	0.179757	-0.217746	-0.199052
21	0.145554	-0.0842902	-0.0973104				20	0.218358	-0.197077	-0.154652
22	0.21748	-0.0638044	0.19493				21	0.145554	-0.0842902	-0.254976
23	0.4612	-0.0796514	-0.282683				22	0.21748	-0.0638044	-0.11933
24	0.174603	-0.103657	-0.235526				23	0.4612	-0.0796514	0.0693353
25	0.521707	0.127429	-0.051197				24	0.174603	-0.103657	-0.172214
26	0.274125	0.0614662	0.157123				25	0.521707	0.127429	0.211491
27	0.430719	0.127429	-0.209435				26	0.274125	0.0614662	-0.0662519
28	0.468873	0.122853	-0.183592				27	0.430719	0.127429	0.139525
29	0.414227	0.116303	-0.173358				28	0.468873	0.122853	0.134256
30	0.492669	0.158155	0.076424				29	0.414227	0.116303	0.0238763
31	0.545076	0.147996	-0.108124				30	0.492669	0.158155	0.0663453
32	0.345994	0.147454	-0.0927331				31	0.545076	0.147996	0.0569934
							32	0.345994	0.147454	0.0197397
