# Supplementary material for: Tropical land use alters functional diversity of soil food webs and leads to monopolization of the detrital energy channel
Source: eLife. 2022 Mar 31;11:e75428. doi: 10.7554/eLife.75428 (PMC9033302; doi:10.7554/eLife.75428)
Supplement: Supplementary file 1. [file elife-75428-supp1.xlsx]

## Sheet: treatment level
Group	System	Metabolism in treatment level	Metabolism Proportion in treatment level
Annelida	F	15.411	0.120456
Araneae	F	7.99775	0.062512
Blattodea	F	12.1047	0.094616
Chilopoda	F	8.66	0.067688
Coleoptera	F	14.8664	0.1162
Collembola	F	7.66113	0.05988
Diplopoda	F	2.56557	0.020056
Diplura	F	3.31175	0.025888
Diptera	F	0.735875	0.005752
Formicidae	F	30.7981	0.24072
Harpacticoida	F	0.041	0.00032
Hemiptera	F	0.919571	0.007184
Hirudinea	F	2.442	0.019088
Hymenoptera	F	0.0314	0.000248
Isopoda	F	1.41729	0.01108
Isoptera	F	5.6665	0.044288
Lepidoptera	F	0.5725	0.004472
Mesostigmata	F	1.611	0.012592
Opiliones	F	0.680333	0.00532
Oribatida	F	1.80913	0.014144
Pauropoda	F	0.292667	0.002288
Prostigmata	F	0.0201667	0.00016
Protura	F	0.0632857	0.000496
Pseudoscorpionida	F	8.08086	0.06316
Psocoptera	F	0.556	0.004344
Schizomida	F	1.3245	0.010352
Symphyla	F	6.24338	0.0488
Thysanoptera	F	0.479571	0.003752
Annelida	J	256.916	0.812096
Araneae	J	2.43038	0.00768
Blattodea	J	9.629	0.03044
Chilopoda	J	3.6885	0.011656
Coleoptera	J	9.81912	0.03104
Collembola	J	3.67925	0.011632
Dermaptera	J	2.839	0.008976
Diplopoda	J	2.48188	0.007848
Diplura	J	4.03388	0.012752
Diptera	J	2.51538	0.007952
Formicidae	J	6.527	0.020632
Harpacticoida	J	0.0835	0.000264
Hemiptera	J	1.2215	0.003864
Hymenoptera	J	0.023	7.2e-05
Isopoda	J	1.0745	0.0034
Isoptera	J	4.48067	0.01416
Lepidoptera	J	0.18775	0.000592
Mesostigmata	J	0.38275	0.001208
Opiliones	J	1.0525	0.003328
Orthoptera	J	0.6185	0.001952
Pauropoda	J	0.150286	0.000472
Prostigmata	J	0.01	3.2e-05
Protura	J	0.0548333	0.000176
Pseudoscorpionida	J	2.83838	0.008968
Psocoptera	J	0.714714	0.002256
Schizomida	J	0.310667	0.000984
Symphyla	J	2.99837	0.00948
Thysanoptera	J	0.51275	0.001624
Annelida	O	164.531	0.804152
Araneae	O	0.694857	0.0034
Blattodea	O	0.559	0.002736
Chilopoda	O	3.21425	0.015712
Coleoptera	O	2.301	0.011248
Collembola	O	6.30387	0.030808
Diplopoda	O	0.978857	0.004784
Diplura	O	1.61825	0.007912
Diptera	O	0.7575	0.003704
Formicidae	O	5.88037	0.028744
Hemiptera	O	1.52025	0.007432
Hymenoptera	O	0.052	0.000256
Isopoda	O	0.554667	0.002712
Isoptera	O	16.215	0.079248
Lepidoptera	O	0.14125	0.000688
Mesostigmata	O	0.477125	0.002328
Oribatida	O	0.962125	0.004704
Orthoptera	O	0.791	0.003864
Pauropoda	O	0.2884	0.001408
Protura	O	0.0456667	0.000224
Pseudoscorpionida	O	0.7072	0.003456
Psocoptera	O	0.343333	0.00168
Symphyla	O	2.28514	0.011168
Thysanoptera	O	0.133375	0.000648
Annelida	R	166.619	0.891024
Araneae	R	3.62012	0.01936
Blattodea	R	0.4035	0.00216
Chilopoda	R	3.09714	0.01656
Coleoptera	R	6.57287	0.035152
Collembola	R	2.32488	0.012432
Dermaptera	R	0.8155	0.00436
Diplopoda	R	0.872625	0.004664
Diplura	R	2.90643	0.015544
Diptera	R	0.660714	0.003536
Formicidae	R	7.713	0.041248
Hemiptera	R	0.508	0.00272
Hirudinea	R	10.3973	0.0556
Hymenoptera	R	0.072	0.000384
Isopoda	R	0.980667	0.005248
Lepidoptera	R	0.576143	0.00308
Mesostigmata	R	0.3815	0.00204
Opiliones	R	0.797	0.004264
Oribatida	R	1.15762	0.006192
Orthoptera	R	0.5185	0.002776
Pauropoda	R	0.126333	0.000672
Prostigmata	R	0.047	0.000248
Protura	R	0.0322	0.000176
Pseudoscorpionida	R	0.6464	0.003456
Psocoptera	R	1.10025	0.00588
Schizomida	R	0.471833	0.00252
Symphyla	R	3.70512	0.019816
Thysanoptera	R	0.608875	0.003256

## Sheet: plots level
ID	GroupCorrected	System	Sum of Metabolism	Metabolism_treatment_level	MetabolismProportion	MetabolismProportion_treatment
HF1	Prostigmata	F	0.002	0.0201667	2e-05	0.00016
HF2	Prostigmata	F	0.002	0.0201667	2.5e-05	0.00016
HF4	Prostigmata	F	0.006	0.0201667	7.1e-05	0.00016
HR2	Hemiptera	R	0.007	0.508	4.3e-05	0.00272
BF4	Prostigmata	F	0.009	0.0201667	9.4e-05	0.00016
BJ4	Prostigmata	J	0.01	0.01	7.5e-05	3.2e-05
BR2	Protura	R	0.01	0.0322	0.000499	0.000176
BF4	Hymenoptera	F	0.011	0.0314	0.000115	0.000248
HF4	Hymenoptera	F	0.011	0.0314	0.000131	0.000248
BR3	Protura	R	0.012	0.0322	6.3e-05	0.000176
HO2	Hymenoptera	O	0.012	0.052	0.000461	0.000256
BR3	Hymenoptera	R	0.016	0.072	8.4e-05	0.000384
HF4	Protura	F	0.016	0.0632857	0.00019	0.000496
BJ2	Protura	J	0.017	0.0548333	3.4e-05	0.000176
BO4	Pauropoda	O	0.018	0.2884	0.000201	0.001408
HJ4	Protura	J	0.018	0.0548333	5.3e-05	0.000176
BO5	Protura	O	0.019	0.0456667	9.5e-05	0.000224
HR4	Hemiptera	R	0.019	0.508	7.6e-05	0.00272
BJ5	Hymenoptera	J	0.02	0.023	0.000483	7.2e-05
BF3	Lepidoptera	F	0.021	0.5725	0.00014	0.004472
BJ5	Pauropoda	J	0.021	0.150286	0.000507	0.000472
HF3	Protura	F	0.021	0.0632857	0.000118	0.000496
BR3	Pauropoda	R	0.022	0.126333	0.000116	0.000672
HJ1	Protura	J	0.022	0.0548333	7.7e-05	0.000176
BF2	Hymenoptera	F	0.023	0.0314	0.000172	0.000248
HJ3	Pauropoda	J	0.023	0.150286	3.2e-05	0.000472
BJ5	Psocoptera	J	0.024	0.714714	0.00058	0.002256
BO4	Protura	O	0.025	0.0456667	0.000279	0.000224
BJ3	Hymenoptera	J	0.026	0.023	7e-05	7.2e-05
HF1	Pauropoda	F	0.026	0.292667	0.000262	0.002288
HR4	Protura	R	0.027	0.0322	0.000108	0.000176
BO3	Pauropoda	O	0.029	0.2884	0.000105	0.001408
BF1	Hymenoptera	F	0.03	0.0314	0.000216	0.000248
HO4	Araneae	O	0.031	0.694857	0.000102	0.0034
HF2	Diptera	F	0.032	0.735875	0.000406	0.005752
BR3	Lepidoptera	R	0.033	0.576143	0.000174	0.00308
BF2	Prostigmata	F	0.035	0.0201667	0.000262	0.00016
HF4	Harpacticoida	F	0.035	0.041	0.000417	0.00032
BO2	Lepidoptera	O	0.037	0.14125	0.000157	0.000688
HF2	Protura	F	0.037	0.0632857	0.000469	0.000496
HR2	Protura	R	0.039	0.0322	0.000239	0.000176
BO5	Hymenoptera	O	0.041	0.052	0.000206	0.000256
HO2	Lepidoptera	O	0.043	0.14125	0.001652	0.000688
BR2	Hymenoptera	R	0.045	0.072	0.002247	0.000384
BF2	Harpacticoida	F	0.047	0.041	0.000351	0.00032
HR2	Prostigmata	R	0.047	0.047	0.000289	0.000248
BJ4	Psocoptera	J	0.049	0.714714	0.000365	0.002256
HR1	Psocoptera	R	0.049	1.10025	0.000155	0.00588
HR1	Pauropoda	R	0.05	0.126333	0.000159	0.000672
BO2	Thysanoptera	O	0.054	0.133375	0.000229	0.000648
HO2	Mesostigmata	O	0.056	0.477125	0.002151	0.002328
BO2	Hymenoptera	O	0.058	0.052	0.000246	0.000256
BR3	Formicidae	R	0.059	7.713	0.000311	0.041248
HF2	Pauropoda	F	0.059	0.292667	0.000748	0.002288
BO4	Hymenoptera	O	0.06	0.052	0.000669	0.000256
BR4	Pseudoscorpionida	R	0.061	0.6464	0.000318	0.003456
BJ4	Protura	J	0.062	0.0548333	0.000462	0.000176
HJ4	Harpacticoida	J	0.065	0.0835	0.000192	0.000264
BJ2	Pauropoda	J	0.066	0.150286	0.000134	0.000472
BF3	Prostigmata	F	0.067	0.0201667	0.000446	0.00016
HR4	Pauropoda	R	0.068	0.126333	0.000273	0.000672
HJ2	Lepidoptera	J	0.071	0.18775	0.000875	0.000592
HJ3	Mesostigmata	J	0.071	0.38275	9.8e-05	0.001208
HR2	Pauropoda	R	0.072	0.126333	0.000442	0.000672
BF3	Thysanoptera	F	0.073	0.479571	0.000486	0.003752
BR4	Protura	R	0.073	0.0322	0.000381	0.000176
HR1	Lepidoptera	R	0.073	0.576143	0.000231	0.00308
BO3	Lepidoptera	O	0.076	0.14125	0.000276	0.000688
BO5	Thysanoptera	O	0.077	0.133375	0.000386	0.000648
HJ4	Pauropoda	J	0.078	0.150286	0.000231	0.000472
BF1	Protura	F	0.079	0.0632857	0.00057	0.000496
BF3	Protura	F	0.081	0.0632857	0.000539	0.000496
HF1	Protura	F	0.081	0.0632857	0.000815	0.000496
BF3	Hymenoptera	F	0.082	0.0314	0.000546	0.000248
BJ5	Protura	J	0.084	0.0548333	0.002029	0.000176
BO3	Thysanoptera	O	0.088	0.133375	0.000319	0.000648
BR4	Hemiptera	R	0.088	0.508	0.000459	0.00272
BO3	Hymenoptera	O	0.089	0.052	0.000323	0.000256
BO4	Mesostigmata	O	0.089	0.477125	0.000993	0.002328
BR2	Hemiptera	R	0.089	0.508	0.004444	0.00272
BJ5	Diplopoda	J	0.09	2.48188	0.002174	0.007848
BO5	Psocoptera	O	0.092	0.343333	0.000462	0.00168
BJ5	Diptera	J	0.093	2.51538	0.002246	0.007952
BO2	Protura	O	0.093	0.0456667	0.000394	0.000224
BJ2	Lepidoptera	J	0.099	0.18775	0.0002	0.000592
BO4	Thysanoptera	O	0.101	0.133375	0.001127	0.000648
HF3	Pauropoda	F	0.101	0.292667	0.000566	0.002288
HJ2	Harpacticoida	J	0.102	0.0835	0.001257	0.000264
BR4	Thysanoptera	R	0.105	0.608875	0.000548	0.003256
HO2	Oribatida	O	0.11	0.962125	0.004226	0.004704
HO3	Mesostigmata	O	0.111	0.477125	0.000421	0.002328
HF2	Mesostigmata	F	0.115	1.611	0.001458	0.012592
HO2	Hemiptera	O	0.125	1.52025	0.004802	0.007432
BJ3	Protura	J	0.126	0.0548333	0.000338	0.000176
BF2	Annelida	F	0.128	15.411	0.000957	0.120456
BF2	Protura	F	0.128	0.0632857	0.000957	0.000496
HO4	Diplopoda	O	0.128	0.978857	0.000422	0.004784
BR2	Diplopoda	R	0.13	0.872625	0.006491	0.004664
HJ3	Hemiptera	J	0.13	1.2215	0.00018	0.003864
HR1	Pseudoscorpionida	R	0.135	0.6464	0.000428	0.003456
HR4	Mesostigmata	R	0.138	0.3815	0.000555	0.00204
BR4	Lepidoptera	R	0.14	0.576143	0.00073	0.00308
BF4	Thysanoptera	F	0.141	0.479571	0.001479	0.003752
BJ5	Annelida	J	0.141	256.916	0.003406	0.812096
HF1	Diplopoda	F	0.144	2.56557	0.001449	0.020056
BJ3	Pauropoda	J	0.146	0.150286	0.000392	0.000472
HO4	Thysanoptera	O	0.147	0.133375	0.000485	0.000648
HR4	Thysanoptera	R	0.147	0.608875	0.000591	0.003256
HF2	Isopoda	F	0.154	1.41729	0.001952	0.01108
HR1	Hymenoptera	R	0.155	0.072	0.000491	0.000384
HO2	Thysanoptera	O	0.157	0.133375	0.006032	0.000648
BR1	Annelida	R	0.158	166.619	0.003769	0.891024
HO3	Thysanoptera	O	0.158	0.133375	0.000599	0.000648
HR2	Diptera	R	0.158	0.660714	0.00097	0.003536
BO4	Diplopoda	O	0.159	0.978857	0.001774	0.004784
BO2	Araneae	O	0.161	0.694857	0.000683	0.0034
BJ5	Mesostigmata	J	0.162	0.38275	0.003913	0.001208
HJ3	Pseudoscorpionida	J	0.162	2.83838	0.000224	0.008968
BR3	Oribatida	R	0.163	1.15762	0.000858	0.006192
BF2	Psocoptera	F	0.171	0.556	0.001279	0.004344
HO1	Mesostigmata	O	0.172	0.477125	0.000981	0.002328
HO4	Mesostigmata	O	0.172	0.477125	0.000568	0.002328
HO2	Pseudoscorpionida	O	0.173	0.7072	0.006646	0.003456
BR3	Isopoda	R	0.176	0.980667	0.000927	0.005248
BR4	Mesostigmata	R	0.178	0.3815	0.000928	0.00204
HJ2	Pauropoda	J	0.183	0.150286	0.002255	0.000472
HR4	Diplura	R	0.183	2.90643	0.000735	0.015544
HR2	Thysanoptera	R	0.185	0.608875	0.001136	0.003256
HJ1	Schizomida	J	0.193	0.310667	0.000672	0.000984
HJ1	Mesostigmata	J	0.194	0.38275	0.000675	0.001208
HF1	Thysanoptera	F	0.197	0.479571	0.001982	0.003752
HF2	Hemiptera	F	0.198	0.919571	0.002509	0.007184
HF4	Diplopoda	F	0.201	2.56557	0.002392	0.020056
BF3	Pauropoda	F	0.209	0.292667	0.001392	0.002288
BJ5	Thysanoptera	J	0.213	0.51275	0.005145	0.001624
BR3	Schizomida	R	0.214	0.471833	0.001127	0.00252
BJ3	Lepidoptera	J	0.216	0.18775	0.00058	0.000592
HF3	Isopoda	F	0.216	1.41729	0.001211	0.01108
HR3	Mesostigmata	R	0.219	0.3815	0.000684	0.00204
HJ2	Thysanoptera	J	0.221	0.51275	0.002723	0.001624
HF3	Psocoptera	F	0.223	0.556	0.00125	0.004344
BF1	Psocoptera	F	0.225	0.556	0.001623	0.004344
HR2	Psocoptera	R	0.225	1.10025	0.001381	0.00588
HR3	Pauropoda	R	0.225	0.126333	0.000703	0.000672
BO3	Diptera	O	0.232	0.7575	0.000841	0.003704
BF2	Thysanoptera	F	0.237	0.479571	0.001772	0.003752
BJ2	Schizomida	J	0.238	0.310667	0.000482	0.000984
BF4	Diplopoda	F	0.246	2.56557	0.00258	0.020056
BR2	Mesostigmata	R	0.246	0.3815	0.012282	0.00204
HF4	Blattodea	F	0.25	12.1047	0.002976	0.094616
HR3	Lepidoptera	R	0.253	0.576143	0.00079	0.00308
HR2	Hirudinea	R	0.257	10.3973	0.001578	0.0556
BR2	Psocoptera	R	0.267	1.10025	0.013331	0.00588
HR1	Thysanoptera	R	0.267	0.608875	0.000847	0.003256
HR4	Oribatida	R	0.267	1.15762	0.001073	0.006192
HR3	Diplura	R	0.284	2.90643	0.000887	0.015544
HO1	Thysanoptera	O	0.285	0.133375	0.001625	0.000648
BR1	Hemiptera	R	0.294	0.508	0.007013	0.00272
HJ2	Hemiptera	J	0.294	1.2215	0.003622	0.003864
HO1	Araneae	O	0.294	0.694857	0.001677	0.0034
HR3	Schizomida	R	0.297	0.471833	0.000928	0.00252
BO4	Oribatida	O	0.301	0.962125	0.003358	0.004704
BR1	Blattodea	R	0.302	0.4035	0.007204	0.00216
HO1	Isopoda	O	0.302	0.554667	0.001722	0.002712
HO1	Pauropoda	O	0.302	0.2884	0.001722	0.001408
HR2	Orthoptera	R	0.303	0.5185	0.00186	0.002776
BR3	Mesostigmata	R	0.307	0.3815	0.001616	0.00204
BR2	Lepidoptera	R	0.308	0.576143	0.015378	0.00308
HO4	Pseudoscorpionida	O	0.308	0.7072	0.001017	0.003456
BO4	Psocoptera	O	0.31	0.343333	0.003458	0.00168
HJ4	Thysanoptera	J	0.31	0.51275	0.000918	0.001624
HJ2	Mesostigmata	J	0.314	0.38275	0.003869	0.001208
BR1	Isoptera	R	0.318	0.318	0.007585	0.001704
HF2	Oribatida	F	0.318	1.80913	0.00403	0.014144
BR4	Pauropoda	R	0.321	0.126333	0.001674	0.000672
HO4	Hemiptera	O	0.323	1.52025	0.001066	0.007432
BO2	Diptera	O	0.324	0.7575	0.001374	0.003704
HO2	Pauropoda	O	0.325	0.2884	0.012486	0.001408
HO3	Isoptera	O	0.325	16.215	0.001232	0.079248
BO2	Oribatida	O	0.326	0.962125	0.001382	0.004704
BR4	Diptera	R	0.326	0.660714	0.0017	0.003536
BR3	Thysanoptera	R	0.331	0.608875	0.001743	0.003256
HF1	Schizomida	F	0.335	1.3245	0.003371	0.010352
HJ3	Symphyla	J	0.34	2.99837	0.000471	0.00948
BR4	Schizomida	R	0.342	0.471833	0.001783	0.00252
HJ3	Thysanoptera	J	0.347	0.51275	0.000481	0.001624
BO5	Hemiptera	O	0.356	1.52025	0.001787	0.007432
BF1	Pauropoda	F	0.364	0.292667	0.002626	0.002288
HJ1	Lepidoptera	J	0.365	0.18775	0.00127	0.000592
BF3	Diptera	F	0.371	0.735875	0.00247	0.005752
BR2	Diptera	R	0.371	0.660714	0.018523	0.003536
HO3	Araneae	O	0.376	0.694857	0.001425	0.0034
BO4	Diptera	O	0.382	0.7575	0.004261	0.003704
BJ3	Diptera	J	0.387	2.51538	0.001039	0.007952
BO3	Mesostigmata	O	0.395	0.477125	0.001432	0.002328
HJ4	Symphyla	J	0.403	2.99837	0.001193	0.00948
HR2	Schizomida	R	0.403	0.471833	0.002474	0.00252
HJ1	Thysanoptera	J	0.406	0.51275	0.001413	0.001624
BO4	Lepidoptera	O	0.409	0.14125	0.004563	0.000688
BO4	Formicidae	O	0.41	5.88037	0.004574	0.028744
HF4	Opiliones	F	0.417	0.680333	0.004963	0.00532
HF3	Thysanoptera	F	0.421	0.479571	0.002361	0.003752
HO2	Diplura	O	0.421	1.61825	0.016174	0.007912
HO4	Isopoda	O	0.422	0.554667	0.001393	0.002712
BF4	Lepidoptera	F	0.423	0.5725	0.004436	0.004472
HF4	Psocoptera	F	0.429	0.556	0.005106	0.004344
BR4	Diplopoda	R	0.432	0.872625	0.002253	0.004664
BJ2	Orthoptera	J	0.439	0.6185	0.000888	0.001952
BJ5	Isopoda	J	0.439	1.0745	0.010604	0.0034
HR3	Oribatida	R	0.454	1.15762	0.001418	0.006192
HR4	Diplopoda	R	0.455	0.872625	0.001828	0.004664
BJ5	Hemiptera	J	0.458	1.2215	0.011063	0.003864
BO3	Hemiptera	O	0.461	1.52025	0.001671	0.007432
HJ2	Psocoptera	J	0.461	0.714714	0.00568	0.002256
HO2	Diptera	O	0.461	0.7575	0.017711	0.003704
HJ2	Oribatida	J	0.479	1.12763	0.005901	0.003568
BR3	Diplopoda	R	0.489	0.872625	0.002575	0.004664
BR1	Thysanoptera	R	0.49	0.608875	0.011688	0.003256
BO5	Isopoda	O	0.491	0.554667	0.002464	0.002712
HF3	Diptera	F	0.492	0.735875	0.002759	0.005752
BJ3	Schizomida	J	0.501	0.310667	0.001346	0.000984
HJ2	Isopoda	J	0.502	1.0745	0.006185	0.0034
BO2	Diplopoda	O	0.503	0.978857	0.002132	0.004784
BF4	Isopoda	F	0.504	1.41729	0.005285	0.01108
HR3	Blattodea	R	0.505	0.4035	0.001577	0.00216
HF1	Hemiptera	F	0.515	0.919571	0.005182	0.007184
HF2	Schizomida	F	0.52	1.3245	0.00659	0.010352
HF4	Diptera	F	0.522	0.735875	0.006213	0.005752
BO3	Isopoda	O	0.535	0.554667	0.00194	0.002712
HJ1	Pauropoda	J	0.535	0.150286	0.001862	0.000472
BJ3	Mesostigmata	J	0.539	0.38275	0.001448	0.001208
HO2	Diplopoda	O	0.54	0.978857	0.020746	0.004784
HJ3	Diptera	J	0.55	2.51538	0.000762	0.007952
BO2	Mesostigmata	O	0.559	0.477125	0.00237	0.002328
BO3	Blattodea	O	0.559	0.559	0.002027	0.002736
BR2	Collembola	R	0.565	2.32488	0.028209	0.012432
BF2	Lepidoptera	F	0.574	0.5725	0.004292	0.004472
BJ4	Mesostigmata	J	0.577	0.38275	0.004302	0.001208
BO2	Isopoda	O	0.582	0.554667	0.002467	0.002712
BO4	Araneae	O	0.589	0.694857	0.006571	0.0034
BJ2	Mesostigmata	J	0.597	0.38275	0.001208	0.001208
HR4	Lepidoptera	R	0.598	0.576143	0.002403	0.00308
HO3	Hemiptera	O	0.599	1.52025	0.002271	0.007432
HR2	Dermaptera	R	0.605	0.8155	0.003714	0.00436
BJ4	Thysanoptera	J	0.607	0.51275	0.004526	0.001624
HJ4	Mesostigmata	J	0.608	0.38275	0.001801	0.001208
BJ5	Chilopoda	J	0.613	3.6885	0.014807	0.011656
HR4	Psocoptera	R	0.619	1.10025	0.002487	0.00588
BF4	Diplura	F	0.624	3.31175	0.006544	0.025888
HF2	Thysanoptera	F	0.625	0.479571	0.007921	0.003752
HO2	Psocoptera	O	0.628	0.343333	0.024127	0.00168
HR2	Mesostigmata	R	0.63	0.3815	0.003867	0.00204
BJ2	Diptera	J	0.637	2.51538	0.001289	0.007952
BJ3	Psocoptera	J	0.639	0.714714	0.001716	0.002256
BJ2	Opiliones	J	0.64	1.0525	0.001295	0.003328
HO1	Oribatida	O	0.646	0.962125	0.003684	0.004704
BR1	Mesostigmata	R	0.649	0.3815	0.015481	0.00204
HO3	Coleoptera	O	0.657	2.301	0.002491	0.011248
BR1	Pseudoscorpionida	R	0.658	0.6464	0.015695	0.003456
BR1	Psocoptera	R	0.658	1.10025	0.015695	0.00588
BR3	Coleoptera	R	0.665	6.57287	0.003501	0.035152
BR2	Oribatida	R	0.666	1.15762	0.033252	0.006192
HJ3	Psocoptera	J	0.666	0.714714	0.000922	0.002256
BJ3	Hemiptera	J	0.671	1.2215	0.001802	0.003864
BR1	Schizomida	R	0.672	0.471833	0.016029	0.00252
BJ2	Hemiptera	J	0.679	1.2215	0.001374	0.003864
HO2	Formicidae	O	0.68	5.88037	0.026125	0.028744
HR1	Mesostigmata	R	0.685	0.3815	0.002172	0.00204
HO1	Diptera	O	0.692	0.7575	0.003946	0.003704
BR2	Araneae	R	0.702	3.62012	0.035049	0.01936
HF3	Hemiptera	F	0.715	0.919571	0.004009	0.007184
BJ3	Thysanoptera	J	0.717	0.51275	0.001926	0.001624
BO5	Coleoptera	O	0.718	2.301	0.003604	0.011248
BR4	Orthoptera	R	0.734	0.5185	0.003828	0.002776
HO1	Pseudoscorpionida	O	0.742	0.7072	0.004231	0.003456
BR3	Diptera	R	0.743	0.660714	0.003912	0.003536
BR2	Symphyla	R	0.75	3.70512	0.037446	0.019816
BO5	Pseudoscorpionida	O	0.757	0.7072	0.003799	0.003456
HO3	Oribatida	O	0.757	0.962125	0.00287	0.004704
BR4	Chilopoda	R	0.758	3.09714	0.003953	0.01656
BO2	Pauropoda	O	0.768	0.2884	0.003256	0.001408
HJ2	Isoptera	J	0.768	4.48067	0.009462	0.01416
BO4	Hemiptera	O	0.771	1.52025	0.008601	0.007432
BR3	Psocoptera	R	0.772	1.10025	0.004065	0.00588
HO1	Diplura	O	0.776	1.61825	0.004425	0.007912
HO4	Symphyla	O	0.777	2.28514	0.002565	0.011168
BF1	Diptera	F	0.779	0.735875	0.005621	0.005752
HJ1	Symphyla	J	0.784	2.99837	0.002729	0.00948
BO4	Orthoptera	O	0.791	0.791	0.008824	0.003864
HR2	Opiliones	R	0.797	0.797	0.004893	0.004264
BJ3	Orthoptera	J	0.798	0.6185	0.002143	0.001952
BF4	Opiliones	F	0.8	0.680333	0.008389	0.00532
BF1	Hemiptera	F	0.805	0.919571	0.005808	0.007184
HR1	Oribatida	R	0.814	1.15762	0.002581	0.006192
HO4	Oribatida	O	0.818	0.962125	0.0027	0.004704
HF4	Mesostigmata	F	0.822	1.611	0.009784	0.012592
BF3	Opiliones	F	0.824	0.680333	0.005487	0.00532
HJ3	Oribatida	J	0.826	1.12763	0.001144	0.003568
BJ4	Diplopoda	J	0.846	2.48188	0.006308	0.007848
BF3	Hemiptera	F	0.853	0.919571	0.00568	0.007184
BR4	Oribatida	R	0.863	1.15762	0.0045	0.006192
HF1	Diptera	F	0.881	0.735875	0.008864	0.005752
BF1	Orthoptera	F	0.883	2.33667	0.006371	0.018264
HJ3	Araneae	J	0.897	2.43038	0.001242	0.00768
HR1	Schizomida	R	0.903	0.471833	0.002863	0.00252
BR3	Pseudoscorpionida	R	0.904	0.6464	0.00476	0.003456
HO3	Diptera	O	0.91	0.7575	0.00345	0.003704
HR1	Diptera	R	0.933	0.660714	0.002958	0.003536
HR3	Diptera	R	0.945	0.660714	0.002951	0.003536
HR2	Diplopoda	R	0.958	0.872625	0.005881	0.004664
BJ2	Isopoda	J	0.968	1.0745	0.001959	0.0034
BF4	Annelida	F	0.978	15.411	0.010256	0.120456
BF2	Hemiptera	F	0.996	0.919571	0.007448	0.007184
HO2	Isopoda	O	0.996	0.554667	0.038265	0.002712
BF2	Pauropoda	F	0.997	0.292667	0.007455	0.002288
HF1	Isopoda	F	1.006	1.41729	0.010122	0.01108
HR3	Dermaptera	R	1.026	0.8155	0.003204	0.00436
BJ4	Diptera	J	1.034	2.51538	0.00771	0.007952
HJ4	Pseudoscorpionida	J	1.047	2.83838	0.003101	0.008968
BR1	Isopoda	R	1.054	0.980667	0.025141	0.005248
HO3	Collembola	O	1.057	6.30387	0.004007	0.030808
HJ1	Araneae	J	1.058	2.43038	0.003682	0.00768
HF3	Chilopoda	F	1.064	8.66	0.005966	0.067688
BF1	Isopoda	F	1.065	1.41729	0.007684	0.01108
HO3	Formicidae	O	1.079	5.88037	0.00409	0.028744
BF2	Mesostigmata	F	1.091	1.611	0.008158	0.012592
BF4	Diptera	F	1.091	0.735875	0.011441	0.005752
HF3	Oribatida	F	1.092	1.80913	0.006123	0.014144
BO5	Diptera	O	1.1	0.7575	0.005521	0.003704
HR2	Oribatida	R	1.103	1.15762	0.006771	0.006192
HJ2	Diplura	J	1.12	4.03388	0.013799	0.012752
BJ2	Oribatida	J	1.121	1.12763	0.002268	0.003568
BR1	Diptera	R	1.149	0.660714	0.027407	0.003536
HJ4	Psocoptera	J	1.152	0.714714	0.003412	0.002256
BJ5	Oribatida	J	1.181	1.12763	0.028527	0.003568
HR4	Araneae	R	1.197	3.62012	0.00481	0.01936
HO3	Diplopoda	O	1.212	0.978857	0.004595	0.004784
HF3	Mesostigmata	F	1.216	1.611	0.006819	0.012592
BF1	Mesostigmata	F	1.219	1.611	0.008796	0.012592
HO2	Coleoptera	O	1.219	2.301	0.046832	0.011248
BJ4	Oribatida	J	1.226	1.12763	0.009141	0.003568
BJ5	Blattodea	J	1.231	9.629	0.029734	0.03044
HF4	Oribatida	F	1.232	1.80913	0.014664	0.014144
HF1	Mesostigmata	F	1.234	1.611	0.012416	0.012592
HJ4	Oribatida	J	1.241	1.12763	0.003675	0.003568
HO1	Hemiptera	O	1.246	1.52025	0.007105	0.007432
HO2	Symphyla	O	1.267	2.28514	0.048676	0.011168
BF1	Lepidoptera	F	1.272	0.5725	0.009178	0.004472
BJ2	Thysanoptera	J	1.281	0.51275	0.002592	0.001624
BJ4	Chilopoda	J	1.306	3.6885	0.009738	0.011656
BO2	Diplura	O	1.308	1.61825	0.005545	0.007912
BO2	Symphyla	O	1.314	2.28514	0.00557	0.011168
BF4	Orthoptera	F	1.317	2.33667	0.013811	0.018264
HJ4	Isoptera	J	1.341	4.48067	0.003971	0.01416
BJ3	Oribatida	J	1.357	1.12763	0.003645	0.003568
HR1	Diplopoda	R	1.373	0.872625	0.004353	0.004664
BF1	Schizomida	F	1.379	1.3245	0.00995	0.010352
HJ1	Pseudoscorpionida	J	1.389	2.83838	0.004834	0.008968
BJ4	Isopoda	J	1.43	1.0745	0.010662	0.0034
BF2	Schizomida	F	1.446	1.3245	0.010813	0.010352
BF1	Oribatida	F	1.448	1.80913	0.010448	0.014144
HR1	Araneae	R	1.457	3.62012	0.00462	0.01936
HJ2	Diptera	J	1.461	2.51538	0.018	0.007952
BJ3	Isopoda	J	1.464	1.0745	0.003932	0.0034
HJ2	Opiliones	J	1.465	1.0525	0.018049	0.003328
BJ5	Formicidae	J	1.471	6.527	0.035531	0.020632
HR2	Pseudoscorpionida	R	1.474	0.6464	0.009049	0.003456
BO2	Formicidae	O	1.483	5.88037	0.006287	0.028744
BR4	Collembola	R	1.498	2.32488	0.007812	0.012432
BO5	Araneae	O	1.519	0.694857	0.007624	0.0034
HR3	Hemiptera	R	1.522	0.508	0.004753	0.00272
BR3	Diplura	R	1.537	2.90643	0.008092	0.015544
HR1	Hemiptera	R	1.537	0.508	0.004873	0.00272
BO3	Oribatida	O	1.545	0.962125	0.005601	0.004704
BO3	Diplopoda	O	1.552	0.978857	0.005626	0.004784
BO3	Pseudoscorpionida	O	1.556	0.7072	0.005641	0.003456
HJ3	Collembola	J	1.566	3.67925	0.002169	0.011632
HR3	Diplopoda	R	1.569	0.872625	0.0049	0.004664
BR1	Diplopoda	R	1.575	0.872625	0.037569	0.004664
HR3	Thysanoptera	R	1.577	0.608875	0.004925	0.003256
HJ1	Oribatida	J	1.59	1.12763	0.005534	0.003568
HF2	Diplura	F	1.617	3.31175	0.020494	0.025888
HJ1	Isopoda	J	1.644	1.0745	0.005722	0.0034
BF1	Thysanoptera	F	1.663	0.479571	0.011999	0.003752
BR2	Diplura	R	1.674	2.90643	0.083579	0.015544
BO4	Chilopoda	O	1.688	3.21425	0.018831	0.015712
BR4	Diplura	R	1.692	2.90643	0.008823	0.015544
HR2	Isopoda	R	1.712	0.980667	0.01051	0.005248
BF2	Diptera	F	1.719	0.735875	0.012854	0.005752
BF4	Psocoptera	F	1.732	0.556	0.018163	0.004344
HF3	Schizomida	F	1.764	1.3245	0.009892	0.010352
BR2	Thysanoptera	R	1.769	0.608875	0.088322	0.003256
HJ4	Chilopoda	J	1.783	3.6885	0.00528	0.011656
BJ2	Diplopoda	J	1.787	2.48188	0.003616	0.007848
HF3	Diplura	F	1.796	3.31175	0.010071	0.025888
BR1	Diplura	R	1.806	2.90643	0.043079	0.015544
HR4	Collembola	R	1.807	2.32488	0.007261	0.012432
HO1	Dermaptera	O	1.83	1.83	0.010436	0.008944
HO3	Symphyla	O	1.88	2.28514	0.007127	0.011168
HJ2	Diplopoda	J	1.888	2.48188	0.023261	0.007848
BO3	Araneae	O	1.894	0.694857	0.006866	0.0034
HO4	Coleoptera	O	1.902	2.301	0.006278	0.011248
HJ4	Diplura	J	1.946	4.03388	0.005763	0.012752
HF2	Araneae	F	1.95	7.99775	0.024714	0.062512
BF2	Isoptera	F	1.958	5.6665	0.014641	0.044288
HO4	Diptera	O	1.959	0.7575	0.006466	0.003704
BR4	Formicidae	R	1.987	7.713	0.010362	0.041248
HO4	Collembola	O	1.996	6.30387	0.006588	0.030808
BJ3	Chilopoda	J	1.998	3.6885	0.005367	0.011656
HJ1	Psocoptera	J	2.012	0.714714	0.007002	0.002256
BJ5	Araneae	J	2.016	2.43038	0.048696	0.00768
HF3	Pseudoscorpionida	F	2.031	8.08086	0.011389	0.06316
BR1	Formicidae	R	2.033	7.713	0.048494	0.041248
BR4	Symphyla	R	2.055	3.70512	0.010716	0.019816
BJ4	Araneae	J	2.096	2.43038	0.015628	0.00768
BR2	Formicidae	R	2.11	7.713	0.105347	0.041248
BF3	Annelida	F	2.121	15.411	0.014123	0.120456
BJ3	Araneae	J	2.137	2.43038	0.00574	0.00768
HO2	Chilopoda	O	2.14	3.21425	0.082216	0.015712
BF1	Diplura	F	2.145	3.31175	0.015477	0.025888
BJ4	Symphyla	J	2.174	2.99837	0.016209	0.00948
BF2	Oribatida	F	2.204	1.80913	0.01648	0.014144
BR4	Psocoptera	R	2.23	1.10025	0.011629	0.00588
HJ4	Collembola	J	2.245	3.67925	0.006649	0.011632
HO1	Chilopoda	O	2.254	3.21425	0.012854	0.015712
HJ3	Coleoptera	J	2.259	9.81912	0.003129	0.03104
BO5	Mesostigmata	O	2.263	0.477125	0.011358	0.002328
HF1	Oribatida	F	2.285	1.80913	0.022991	0.014144
BF3	Oribatida	F	2.313	1.80913	0.015402	0.014144
BJ2	Chilopoda	J	2.343	3.6885	0.004741	0.011656
BF4	Hemiptera	F	2.355	0.919571	0.024696	0.007184
BJ5	Collembola	J	2.365	3.67925	0.057126	0.011632
BO2	Chilopoda	O	2.372	3.21425	0.010056	0.015712
HJ3	Diplura	J	2.411	4.03388	0.003339	0.012752
HR4	Chilopoda	R	2.425	3.09714	0.009744	0.01656
BF3	Mesostigmata	F	2.429	1.611	0.016174	0.012592
BF2	Hirudinea	F	2.442	2.442	0.01826	0.019088
BR1	Araneae	R	2.459	3.62012	0.058655	0.01936
HR2	Collembola	R	2.469	2.32488	0.015157	0.012432
BR3	Collembola	R	2.473	2.32488	0.01302	0.012432
BJ3	Diplopoda	J	2.481	2.48188	0.006664	0.007848
HF2	Collembola	F	2.491	7.66113	0.031571	0.05988
HF4	Schizomida	F	2.503	1.3245	0.029792	0.010352
HJ4	Diplopoda	J	2.511	2.48188	0.007436	0.007848
HJ4	Diptera	J	2.582	2.51538	0.007647	0.007952
BR1	Lepidoptera	R	2.628	0.576143	0.062686	0.00308
HJ4	Formicidae	J	2.649	6.527	0.007845	0.020632
BR4	Hirudinea	R	2.687	10.3973	0.014012	0.0556
BO5	Diplopoda	O	2.758	0.978857	0.013843	0.004784
BJ5	Symphyla	J	2.81	2.99837	0.067874	0.00948
HJ3	Diplopoda	J	2.811	2.48188	0.003893	0.007848
HJ1	Dermaptera	J	2.839	2.839	0.00988	0.008976
BO4	Coleoptera	O	2.88	2.301	0.032128	0.011248
BR4	Araneae	R	2.915	3.62012	0.015201	0.01936
BR1	Collembola	R	2.933	2.32488	0.069962	0.012432
HO1	Symphyla	O	2.981	2.28514	0.017	0.011168
BR1	Chilopoda	R	3.019	3.09714	0.072013	0.01656
BF2	Isopoda	F	3.081	1.41729	0.023038	0.01108
HR1	Collembola	R	3.148	2.32488	0.009982	0.012432
BO5	Symphyla	O	3.156	2.28514	0.01584	0.011168
HR1	Chilopoda	R	3.167	3.09714	0.010042	0.01656
BR3	Symphyla	R	3.173	3.70512	0.016706	0.019816
BO5	Oribatida	O	3.194	0.962125	0.016031	0.004704
HJ2	Symphyla	J	3.204	2.99837	0.039474	0.00948
HO4	Formicidae	O	3.283	5.88037	0.010836	0.028744
HR1	Symphyla	R	3.297	3.70512	0.010454	0.019816
HF1	Diplura	F	3.324	3.31175	0.033445	0.025888
HO4	Chilopoda	O	3.327	3.21425	0.010982	0.015712
BF3	Diplopoda	F	3.338	2.56557	0.022227	0.020056
BO3	Coleoptera	O	3.362	2.301	0.012188	0.011248
BF1	Diplopoda	F	3.417	2.56557	0.024655	0.020056
HJ4	Araneae	J	3.417	2.43038	0.010119	0.00768
BJ2	Pseudoscorpionida	J	3.418	2.83838	0.006916	0.008968
HR3	Chilopoda	R	3.441	3.09714	0.010746	0.01656
BJ5	Pseudoscorpionida	J	3.446	2.83838	0.083237	0.008968
BJ2	Formicidae	J	3.469	6.527	0.00702	0.020632
BJ2	Araneae	J	3.506	2.43038	0.007094	0.00768
BF4	Symphyla	F	3.515	6.24338	0.036861	0.0488
BF2	Diplopoda	F	3.544	2.56557	0.0265	0.020056
BF4	Oribatida	F	3.581	1.80913	0.037553	0.014144
HR3	Collembola	R	3.706	2.32488	0.011574	0.012432
BF2	Diplura	F	3.732	3.31175	0.027906	0.025888
HO1	Coleoptera	O	3.774	2.301	0.021522	0.011248
BJ2	Diplura	J	3.784	4.03388	0.007657	0.012752
HJ2	Pseudoscorpionida	J	3.819	2.83838	0.047051	0.008968
HR2	Chilopoda	R	3.828	3.09714	0.0235	0.01656
BF3	Isopoda	F	3.895	1.41729	0.025936	0.01108
BO2	Coleoptera	O	3.896	2.301	0.016516	0.011248
HF4	Annelida	F	3.902	15.411	0.046444	0.120456
BR4	Coleoptera	R	3.903	6.57287	0.020353	0.035152
BJ2	Collembola	J	3.915	3.67925	0.007922	0.011632
HR4	Symphyla	R	3.962	3.70512	0.015921	0.019816
BO5	Diplura	O	3.968	1.61825	0.019916	0.007912
BR3	Araneae	R	3.973	3.62012	0.020918	0.01936
BF2	Collembola	F	3.977	7.66113	0.029738	0.05988
HR3	Psocoptera	R	3.982	1.10025	0.012436	0.00588
HR4	Formicidae	R	4.072	7.713	0.016363	0.041248
BJ3	Collembola	J	4.12	3.67925	0.011066	0.011632
HF3	Symphyla	F	4.224	6.24338	0.023686	0.0488
BJ5	Diplura	J	4.273	4.03388	0.103213	0.012752
HJ2	Araneae	J	4.316	2.43038	0.053174	0.00768
BO5	Chilopoda	O	4.421	3.21425	0.022189	0.015712
BJ3	Pseudoscorpionida	J	4.45	2.83838	0.011953	0.008968
HR2	Symphyla	R	4.453	3.70512	0.027336	0.019816
HO3	Chilopoda	O	4.462	3.21425	0.016915	0.015712
BJ3	Diplura	J	4.47	4.03388	0.012006	0.012752
HJ1	Collembola	J	4.478	3.67925	0.015584	0.011632
BF3	Symphyla	F	4.571	6.24338	0.030438	0.0488
BO3	Symphyla	O	4.621	2.28514	0.016752	0.011168
BJ2	Symphyla	J	4.651	2.99837	0.009411	0.00948
BO4	Collembola	O	4.678	6.30387	0.052186	0.030808
HO1	Formicidae	O	4.682	5.88037	0.0267	0.028744
HF2	Formicidae	F	4.721	30.7981	0.059834	0.24072
HJ1	Coleoptera	J	4.761	9.81912	0.016569	0.03104
BF4	Mesostigmata	F	4.762	1.611	0.049938	0.012592
HF4	Orthoptera	F	4.81	2.33667	0.057252	0.018264
HJ1	Formicidae	J	4.86	6.527	0.016914	0.020632
BO5	Formicidae	O	4.908	5.88037	0.024634	0.028744
BR1	Oribatida	R	4.931	1.15762	0.11762	0.006192
BJ4	Pseudoscorpionida	J	4.976	2.83838	0.037101	0.008968
HO2	Collembola	O	4.998	6.30387	0.192017	0.030808
BJ4	Collembola	J	5.015	3.67925	0.037392	0.011632
BR3	Chilopoda	R	5.042	3.09714	0.026546	0.01656
BO3	Chilopoda	O	5.05	3.21425	0.018308	0.015712
HJ1	Hemiptera	J	5.097	1.2215	0.017739	0.003864
BF1	Pseudoscorpionida	F	5.129	8.08086	0.037008	0.06316
HR3	Symphyla	R	5.136	3.70512	0.016039	0.019816
BF4	Chilopoda	F	5.171	8.66	0.054227	0.067688
BF1	Symphyla	F	5.222	6.24338	0.037679	0.0488
HR1	Formicidae	R	5.567	7.713	0.017652	0.041248
HF2	Symphyla	F	5.597	6.24338	0.070936	0.0488
HJ1	Chilopoda	J	5.68	3.6885	0.019768	0.011656
HJ2	Collembola	J	5.73	3.67925	0.070595	0.011632
HR1	Coleoptera	R	5.855	6.57287	0.018565	0.035152
HF4	Coleoptera	F	5.962	14.8664	0.070964	0.1162
BJ4	Diplura	J	6.107	4.03388	0.045534	0.012752
BF2	Symphyla	F	6.121	6.24338	0.04577	0.0488
BF3	Araneae	F	6.152	7.99775	0.040965	0.062512
HJ3	Chilopoda	J	6.204	3.6885	0.008593	0.011656
HF4	Diplura	F	6.348	3.31175	0.075558	0.025888
BF1	Araneae	F	6.445	7.99775	0.046504	0.062512
BF2	Chilopoda	F	6.481	8.66	0.048462	0.067688
HF1	Collembola	F	6.531	7.66113	0.065712	0.05988
BF2	Pseudoscorpionida	F	6.548	8.08086	0.048963	0.06316
HF4	Pseudoscorpionida	F	6.584	8.08086	0.078367	0.06316
HR2	Araneae	R	6.631	3.62012	0.040707	0.01936
HR3	Coleoptera	R	6.682	6.57287	0.020868	0.035152
HF2	Coleoptera	F	6.734	14.8664	0.085346	0.1162
HF3	Collembola	F	6.752	7.66113	0.037862	0.05988
HF4	Araneae	F	6.807	7.99775	0.081021	0.062512
BR1	Symphyla	R	6.815	3.70512	0.16256	0.019816
BO2	Collembola	O	6.863	6.30387	0.029094	0.030808
BF3	Diplura	F	6.908	3.31175	0.045999	0.025888
HF3	Diplopoda	F	7.069	2.56557	0.03964	0.020056
HJ3	Formicidae	J	7.071	6.527	0.009794	0.020632
HF4	Collembola	F	7.093	7.66113	0.084425	0.05988
BJ3	Formicidae	J	7.299	6.527	0.019605	0.020632
BR1	Coleoptera	R	7.322	6.57287	0.174654	0.035152
HJ1	Diplopoda	J	7.441	2.48188	0.025896	0.007848
BF1	Collembola	F	7.527	7.66113	0.054311	0.05988
BF4	Araneae	F	7.658	7.99775	0.080308	0.062512
HJ2	Blattodea	J	7.792	9.629	0.096	0.03044
HJ4	Coleoptera	J	7.917	9.81912	0.023446	0.03104
BJ4	Formicidae	J	8.144	6.527	0.060722	0.020632
HJ1	Diplura	J	8.16	4.03388	0.028399	0.012752
HF3	Araneae	F	8.271	7.99775	0.04638	0.062512
BO2	Hemiptera	O	8.281	1.52025	0.035106	0.007432
HF4	Chilopoda	F	8.282	8.66	0.098578	0.067688
HO1	Collembola	O	8.696	6.30387	0.04959	0.030808
HR2	Coleoptera	R	8.696	6.57287	0.053384	0.035152
HF1	Pseudoscorpionida	F	8.84	8.08086	0.088944	0.06316
BJ5	Coleoptera	J	8.916	9.81912	0.215362	0.03104
HJ2	Coleoptera	J	8.924	9.81912	0.109946	0.03104
BF2	Araneae	F	8.951	7.99775	0.066931	0.062512
HF1	Annelida	F	9.109	15.411	0.091651	0.120456
HR4	Coleoptera	R	9.133	6.57287	0.036699	0.035152
BF4	Coleoptera	F	9.352	14.8664	0.098073	0.1162
BF3	Isoptera	F	9.375	5.6665	0.062427	0.044288
HR3	Formicidae	R	9.463	7.713	0.029552	0.041248
HJ2	Chilopoda	J	9.581	3.6885	0.118041	0.011656
BJ3	Symphyla	J	9.621	2.99837	0.025842	0.00948
HR3	Araneae	R	9.627	3.62012	0.030065	0.01936
HF1	Chilopoda	F	9.96	8.66	0.100213	0.067688
BF4	Collembola	F	10.257	7.66113	0.107563	0.05988
BJ3	Coleoptera	J	10.304	9.81912	0.027676	0.03104
BR2	Coleoptera	R	10.327	6.57287	0.515602	0.035152
HF4	Symphyla	F	10.341	6.24338	0.123085	0.0488
HF1	Symphyla	F	10.356	6.24338	0.104198	0.0488
BO3	Collembola	O	10.512	6.30387	0.038109	0.030808
BF3	Coleoptera	F	10.575	14.8664	0.070417	0.1162
BF4	Blattodea	F	10.654	12.1047	0.111726	0.094616
BF3	Chilopoda	F	10.795	8.66	0.071882	0.067688
HJ2	Annelida	J	11.219	256.916	0.138221	0.812096
BJ5	Isoptera	J	11.333	4.48067	0.273744	0.01416
HF1	Coleoptera	F	11.508	14.8664	0.115789	0.1162
BO5	Collembola	O	11.631	6.30387	0.058377	0.030808
HO2	Annelida	O	11.678	164.531	0.448653	0.804152
BF1	Chilopoda	F	11.973	8.66	0.086391	0.067688
BF1	Blattodea	F	12.087	12.1047	0.087213	0.094616
BF1	Coleoptera	F	12.796	14.8664	0.092329	0.1162
HR2	Diplura	R	13.169	2.90643	0.080843	0.015544
HJ1	Diptera	J	13.379	2.51538	0.046562	0.007952
BF3	Pseudoscorpionida	F	13.504	8.08086	0.089921	0.06316
BF4	Pseudoscorpionida	F	13.93	8.08086	0.146081	0.06316
HF3	Coleoptera	F	15.195	14.8664	0.085207	0.1162
HF1	Formicidae	F	15.306	30.7981	0.154002	0.24072
BJ2	Coleoptera	J	15.401	9.81912	0.031164	0.03104
HF2	Chilopoda	F	15.554	8.66	0.197131	0.067688
BF4	Formicidae	F	16.247	30.7981	0.170379	0.24072
BF3	Collembola	F	16.661	7.66113	0.110943	0.05988
HJ2	Formicidae	J	17.253	6.527	0.212562	0.020632
HF4	Formicidae	F	17.442	30.7981	0.207606	0.24072
HF1	Araneae	F	17.748	7.99775	0.178573	0.062512
BJ2	Blattodea	J	19.864	9.629	0.040195	0.03044
BJ4	Coleoptera	J	20.071	9.81912	0.149651	0.03104
BF3	Blattodea	F	25.428	12.1047	0.169321	0.094616
HR1	Hirudinea	R	28.248	10.3973	0.089567	0.0556
BF3	Formicidae	F	29.53	30.7981	0.196636	0.24072
BF2	Formicidae	F	30.294	30.7981	0.226524	0.24072
BO3	Formicidae	O	30.518	5.88037	0.110637	0.028744
BO3	Isoptera	O	32.105	16.215	0.11639	0.079248
HR2	Formicidae	R	36.413	7.713	0.223535	0.041248
HF2	Annelida	F	38.178	15.411	0.483866	0.120456
BF2	Coleoptera	F	46.809	14.8664	0.350016	0.1162
HF3	Annelida	F	53.461	15.411	0.299787	0.120456
BF1	Formicidae	F	60.639	30.7981	0.437539	0.24072
HF3	Formicidae	F	72.206	30.7981	0.404901	0.24072
BO4	Annelida	O	75.98	164.531	0.847603	0.804152
HR2	Annelida	R	78.262	166.619	0.480442	0.891024
BJ4	Annelida	J	78.389	256.916	0.584473	0.812096
HO1	Annelida	O	145.684	164.531	0.83078	0.804152
BO5	Annelida	O	157.77	164.531	0.791863	0.804152
BR4	Annelida	R	168.373	166.619	0.878036	0.891024
BR3	Annelida	R	168.83	166.619	0.888888	0.891024
BO3	Annelida	O	180.661	164.531	0.654949	0.804152
BO2	Annelida	O	206.905	164.531	0.877136	0.804152
HJ1	Annelida	J	220.45	256.916	0.767218	0.812096
HR4	Annelida	R	223.744	166.619	0.899072	0.891024
HO3	Annelida	O	250.201	164.531	0.948507	0.804152
HR1	Annelida	R	257.67	166.619	0.817007	0.891024
HR3	Annelida	R	269.297	166.619	0.841001	0.891024
HO4	Annelida	O	287.367	164.531	0.948531	0.804152
HJ4	Annelida	J	306.356	256.916	0.907267	0.812096
BJ3	Annelida	J	317.836	256.916	0.853702	0.812096
BJ2	Annelida	J	425.273	256.916	0.86054	0.812096
HJ3	Annelida	J	695.665	256.916	0.963526	0.812096
