# Supplementary figures and images for: Tropical land use alters functional diversity of soil food webs and leads to monopolization of the detrital energy channel
Source: eLife journal article supplement (doi:10.7554/elife.75428), 2022-03-30

# Metabolism proportion

F

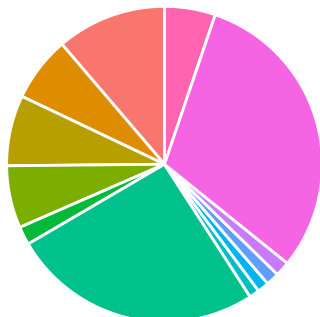

J

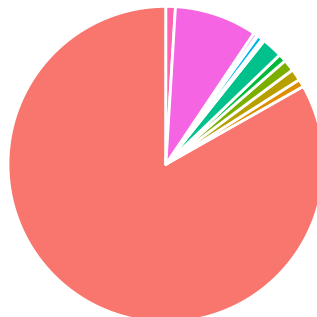

R

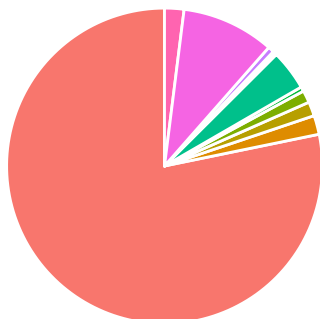

O

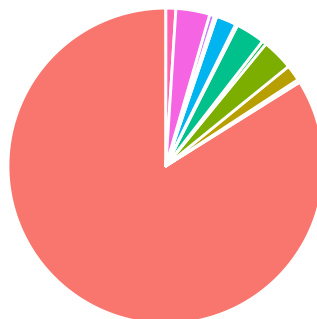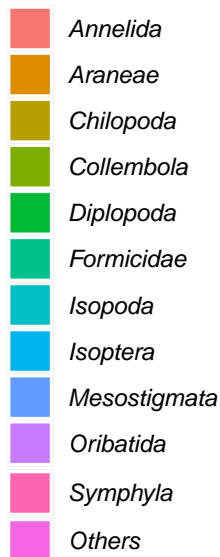

Metabolism

Supplement: supp [file elife_poa_e75428_Figure_1_figure_supplement_1.pdf › elife_poa_e75428_Figure_1_figure_supplement_1.pdf]

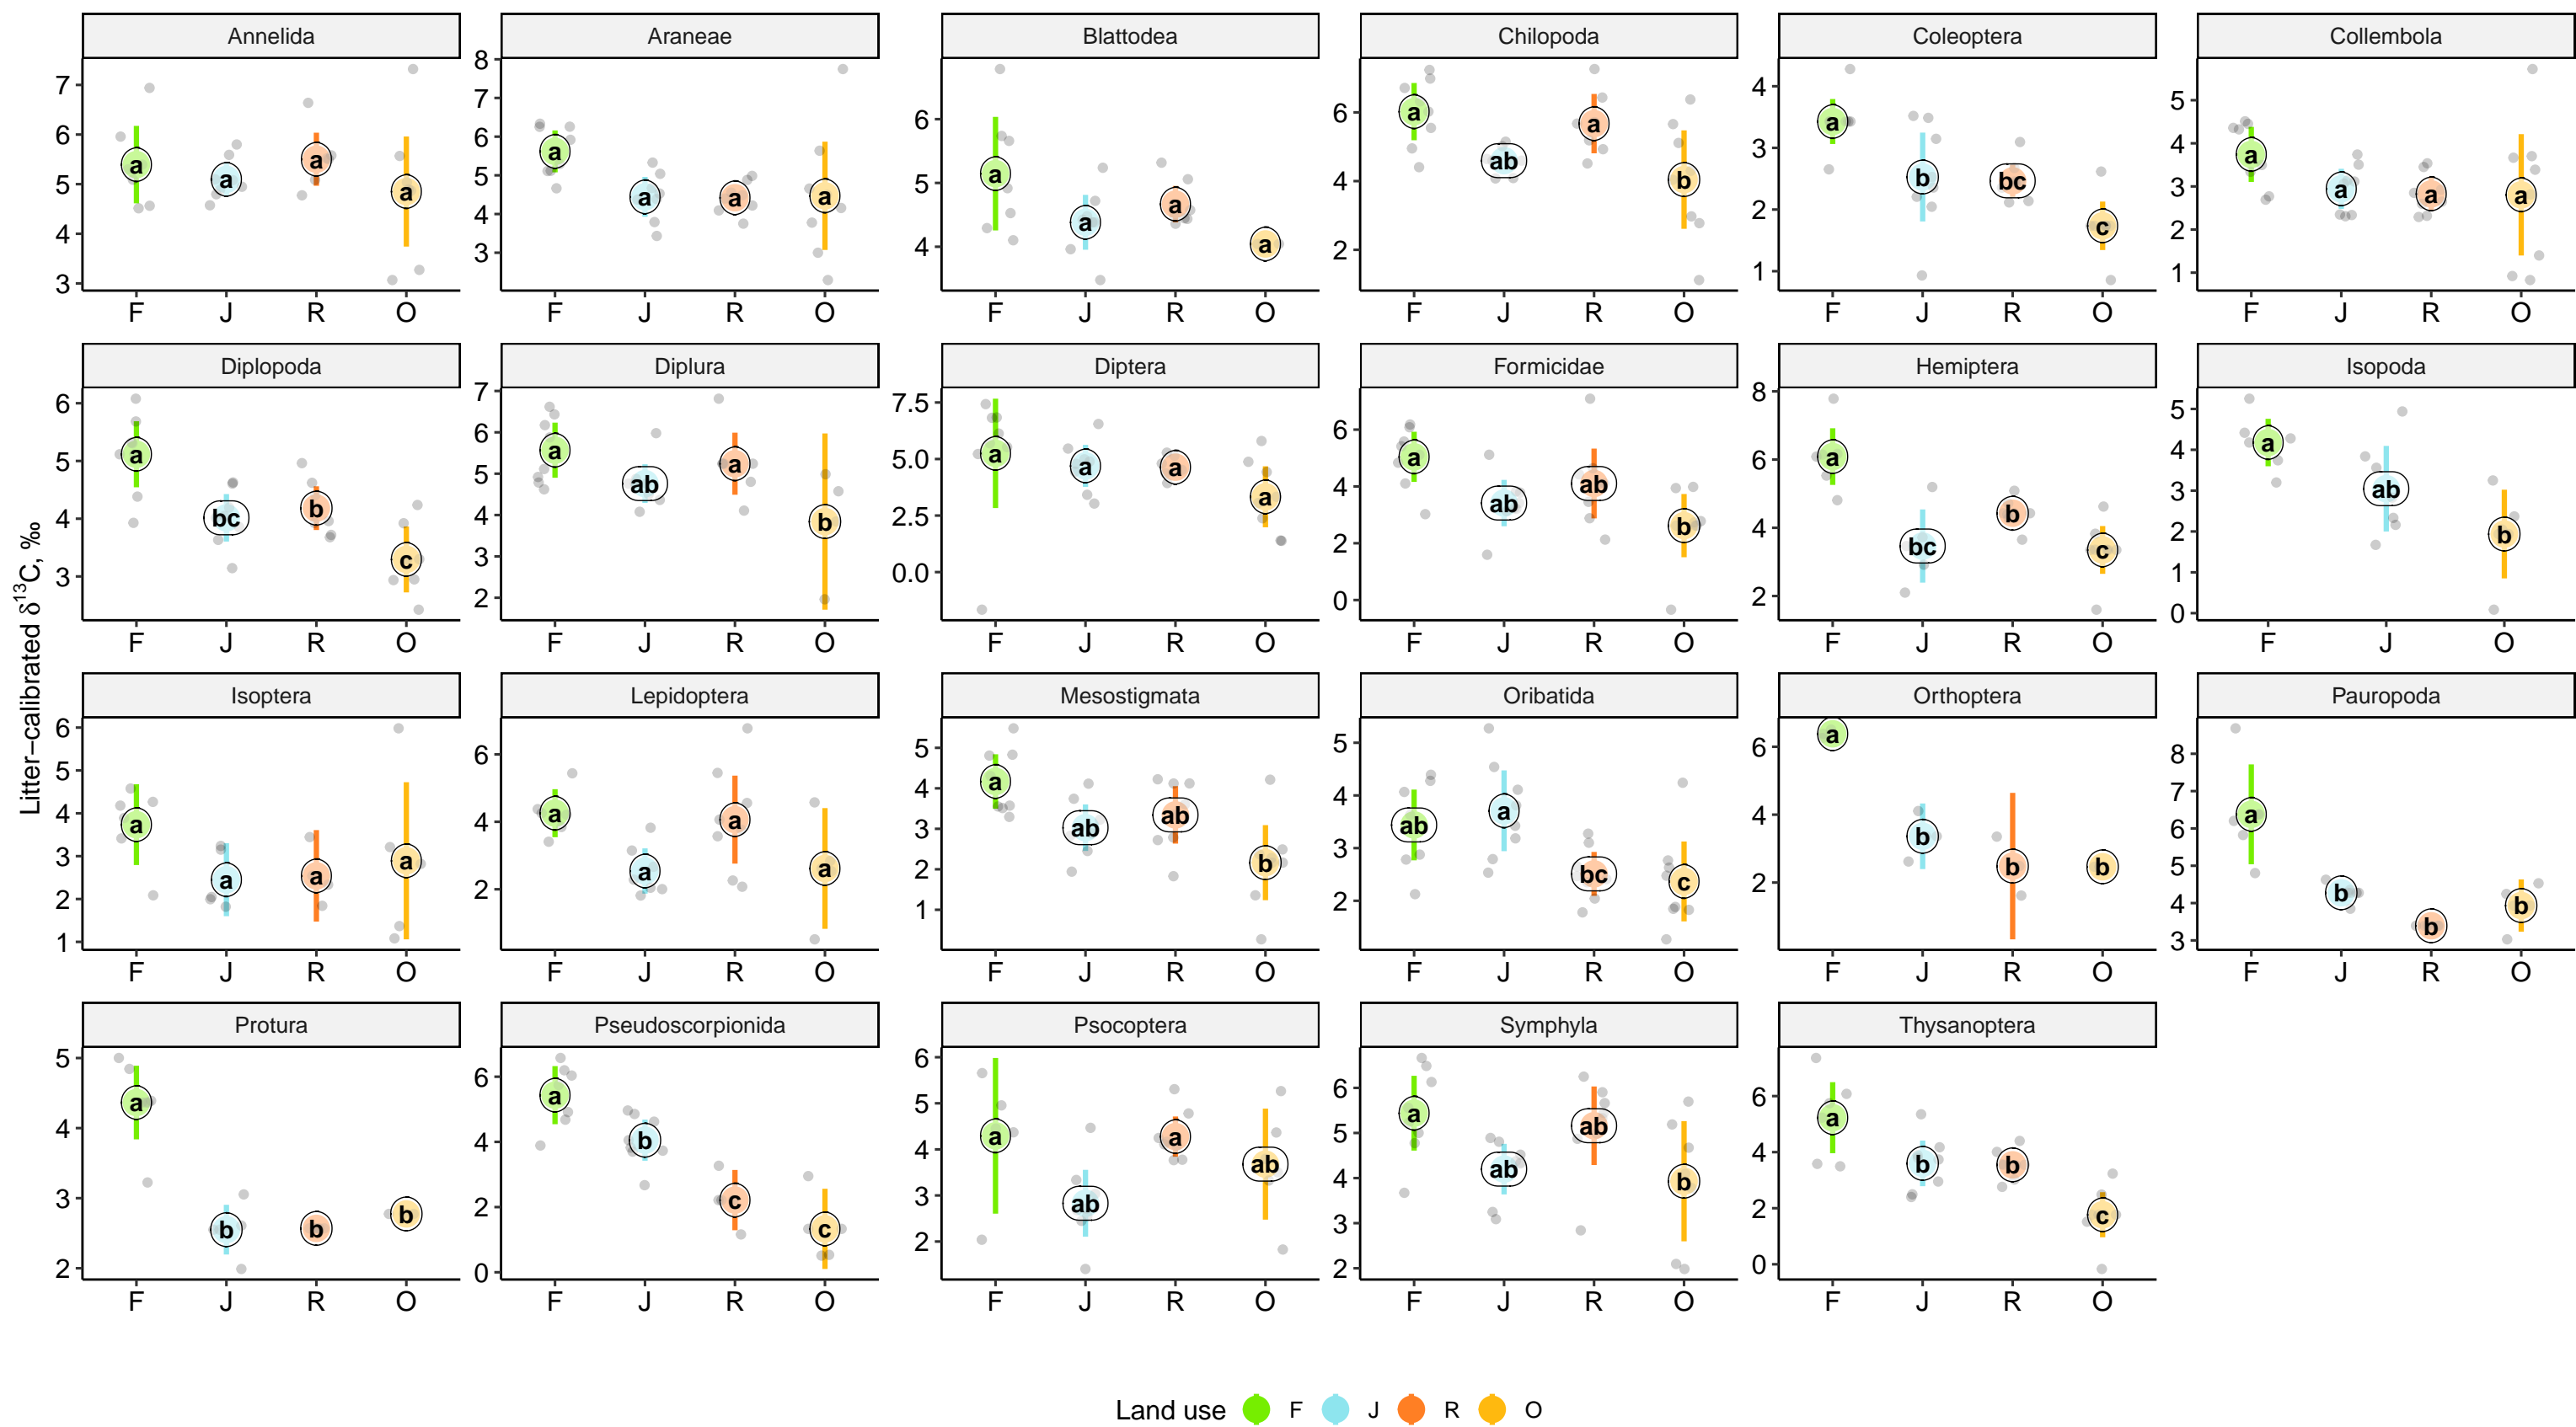

Supplement: supp [file elife_poa_e75428_Figure_2_figure_supplement_1.pdf › elife_poa_e75428_Figure_2_figure_supplement_1.pdf]

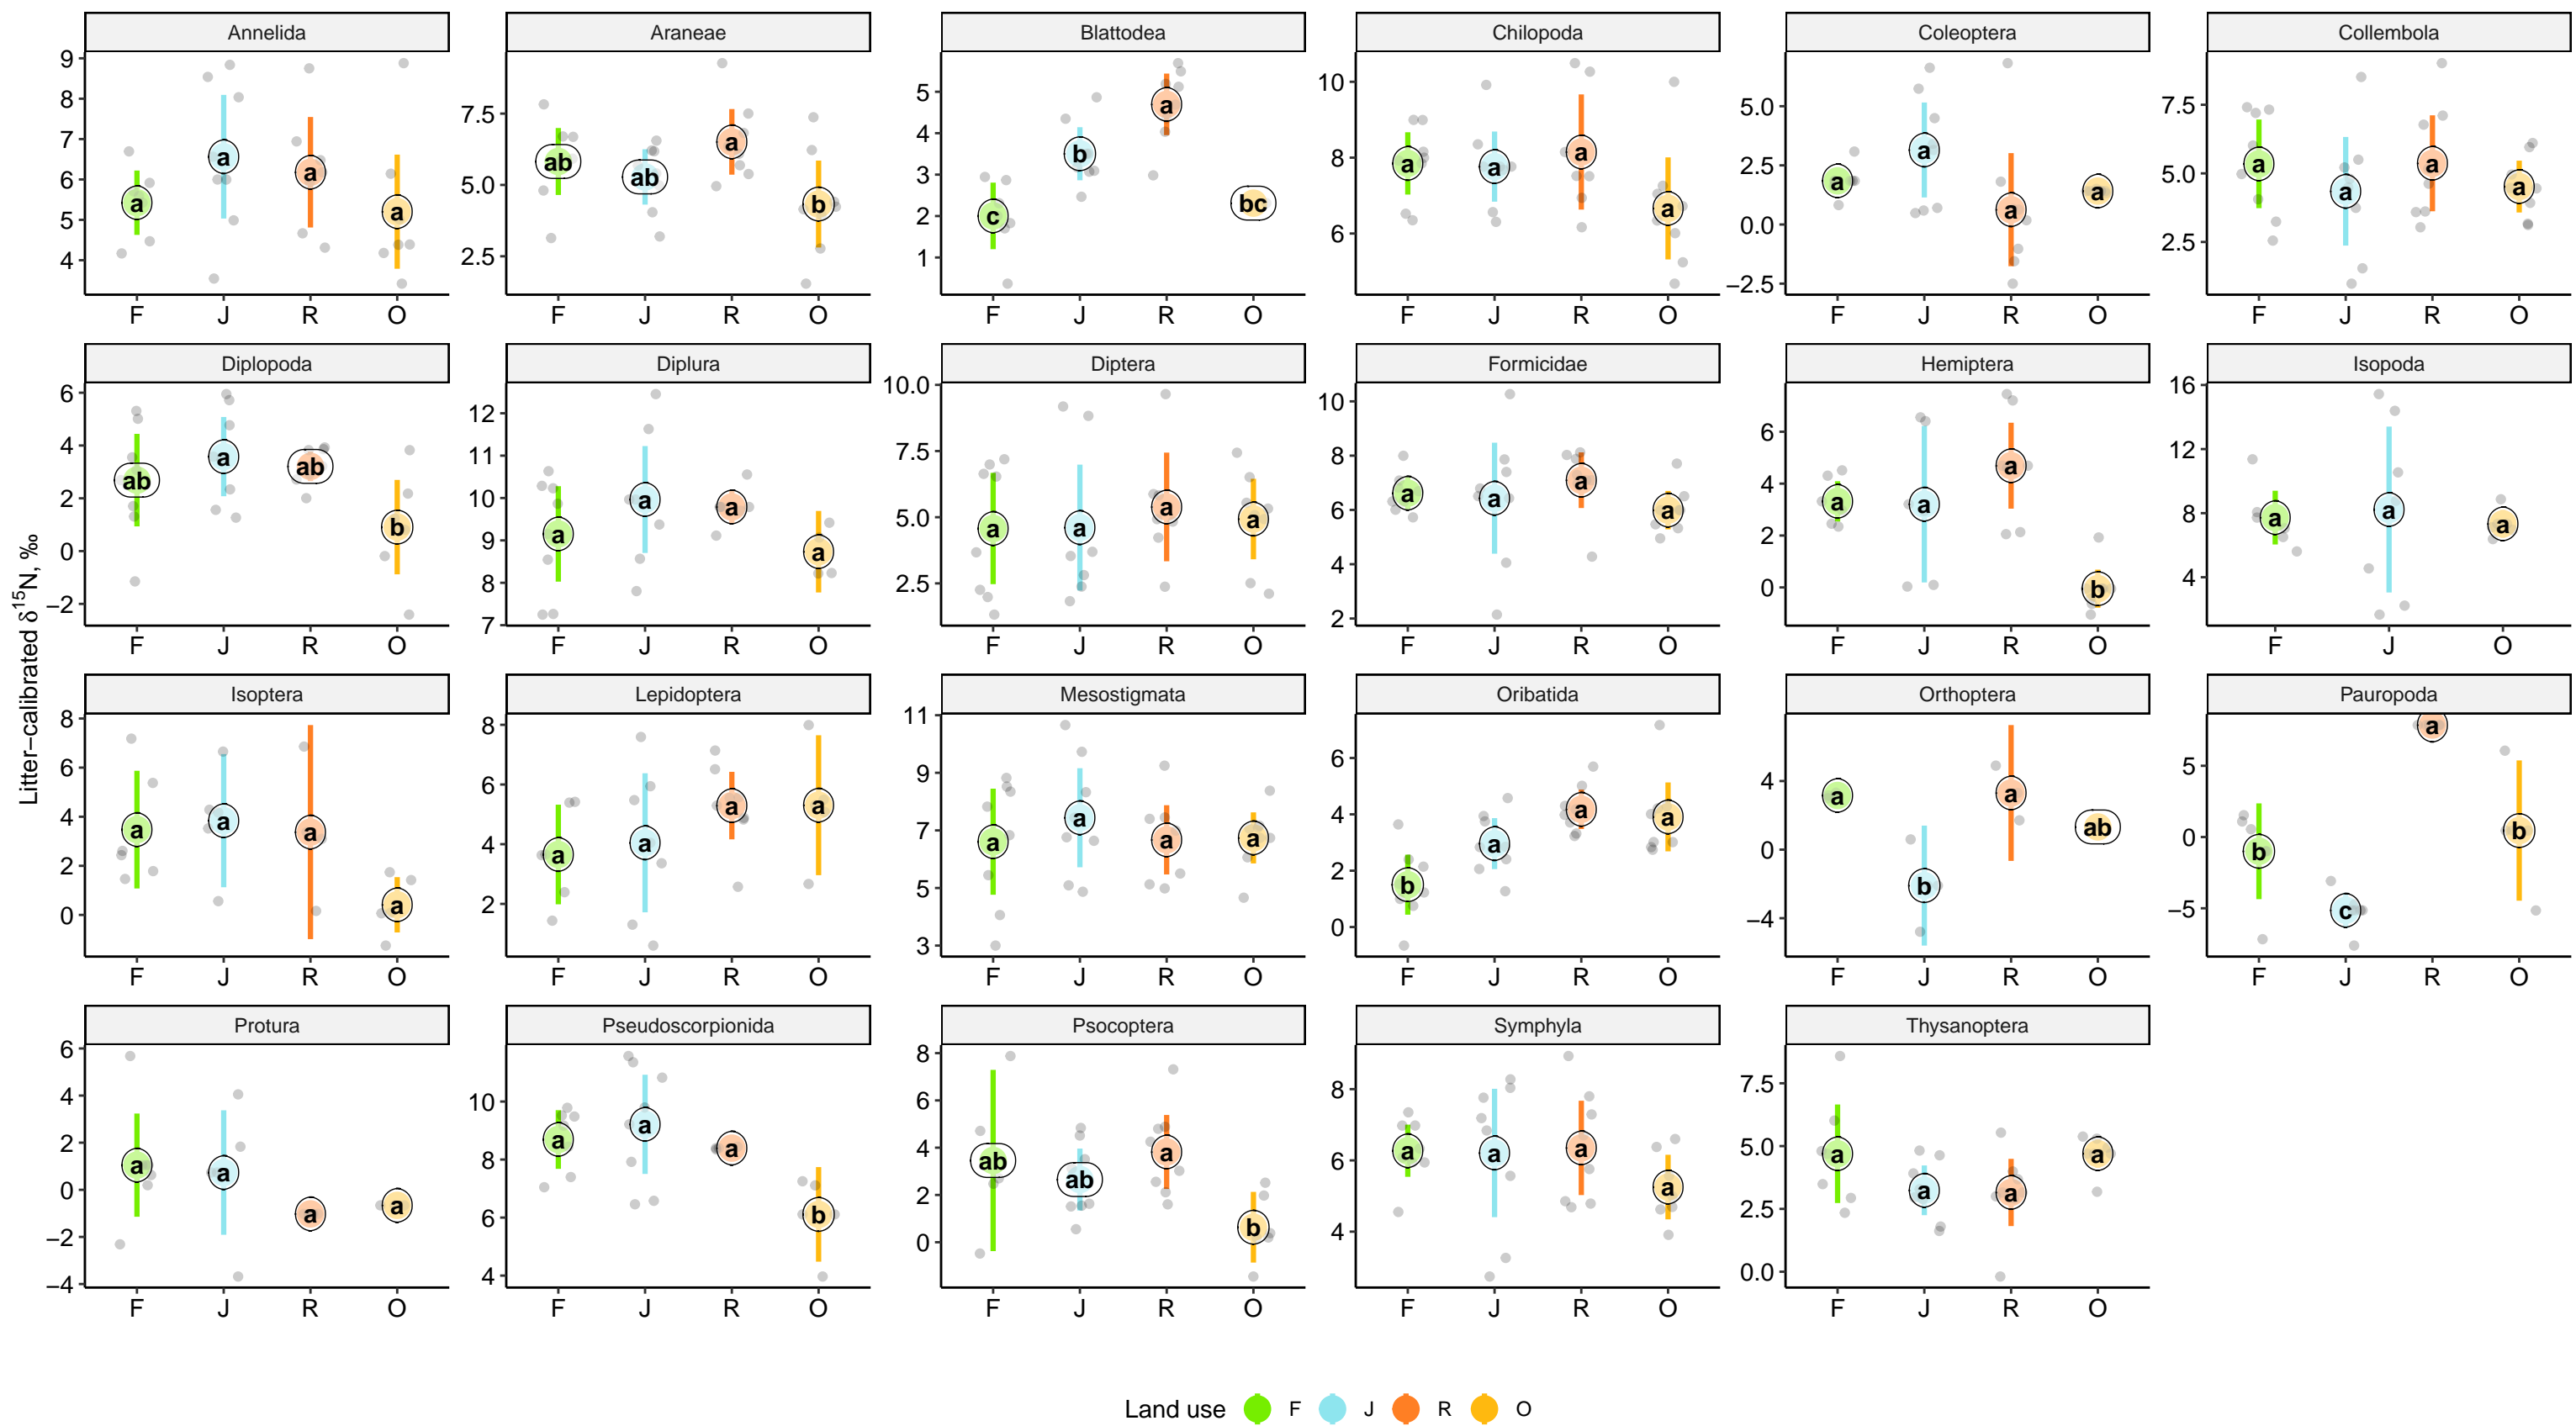

Supplement: supp [file elife_poa_e75428_Figure_2_figure_supplement_2.pdf › elife_poa_e75428_Figure_2_figure_supplement_2.pdf]
